# Supplementary material for: A Concise Diastereoselective Total Synthesis of α-Ambrinol
Source: MDPI journal article supplement (doi:10.3390/md21040230), 2023-04-01
Supplement: s1 [file s1]

## Supporting Information

### A concise diastereoselective total synthesis of $\alpha$ -ambrinol

Josefa L. López-Martínez<sup>1</sup>, Irene Torres-García<sup>1</sup>, Irene Moreno-Gutiérrez<sup>1</sup>, Pascual Oña Burgos<sup>2</sup>, Antonio Rosales-Martínez<sup>3</sup>, Manuel Muñoz-Dorado<sup>1</sup>, Miriam Álvarez-Corral<sup>1\*</sup>, Ignacio Rodríguez-García<sup>1\*</sup>.

- 1 Organic Chemistry, University of Almería, CIAIMBITAL. E04120 Almería, Spain; pepaloma91@hotmail.com (J.L.L.-M.); irene.tg.94@gmail.com (I.T.-G.); irenemorenogtr@gmail.com (I.M.-G.); mdorado@ual.es (M.M.-D.); malvarez@ual.es (M.A.-C.); irodrigu@ual.es (I.R.-G.)
- 2 Instituto de Tecnología Química, Universitat Politècnica de València-Consejo Superior de Investigaciones Científicas (UPV-CSIC), 46022 Valencia, Spain; pasoabur@itq.upv.es
- 3 Department of Chemical Engineering, Escuela Politécnica Superior, University of Sevilla, 41011 Sevilla, Spain; arosales@us.es

\* Correspondence: [irodrigu@ual.es](mailto:irodrigu@ual.es).

### NMR AND IR SPECTRA

|                                                                                                         |    |
|---------------------------------------------------------------------------------------------------------|----|
| <sup>1</sup> H NMR, DEPT 135, <sup>13</sup> C NMR and IR of <b>12</b> .....                             | 1  |
| <sup>1</sup> H NMR, DEPT 135, <sup>13</sup> C NMR, HSQC, HMBC, COSY and IR of <b>cis-21</b> .....       | 4  |
| <sup>1</sup> H NMR, DEPT 135, <sup>13</sup> C NMR, HSQC, HMBC, COSY, NOESY 1D and IR of <b>23</b> ..... | 11 |
| <sup>1</sup> H NMR, DEPT 135, <sup>13</sup> C NMR, HSQC and IR of <b>20</b> .....                       | 18 |
| <sup>1</sup> H NMR, DEPT 135, <sup>13</sup> C NMR, HSQC, HMBC, COSY, NOESY 1D and IR of <b>6</b> .....  | 22 |
| <sup>1</sup> H NMR, DEPT 135, <sup>13</sup> C NMR, HSQC, HMBC, COSY, NOESY 1D and IR of <b>24</b> ..... | 30 |
| <sup>1</sup> H NMR of <b>25</b> .....                                                                   | 38 |
| <sup>1</sup> H NMR, DEPT 135, <sup>13</sup> C NMR and IR of <b>22</b> .....                             | 39 |
| <sup>1</sup> H NMR, DEPT 135, <sup>13</sup> C NMR, HSQC, HMBC, COSY and IR of <b>26</b> .....           | 42 |

**$^1\text{H}$  NMR, DEPT 135,  $^{13}\text{C}$  NMR and IR of 12**

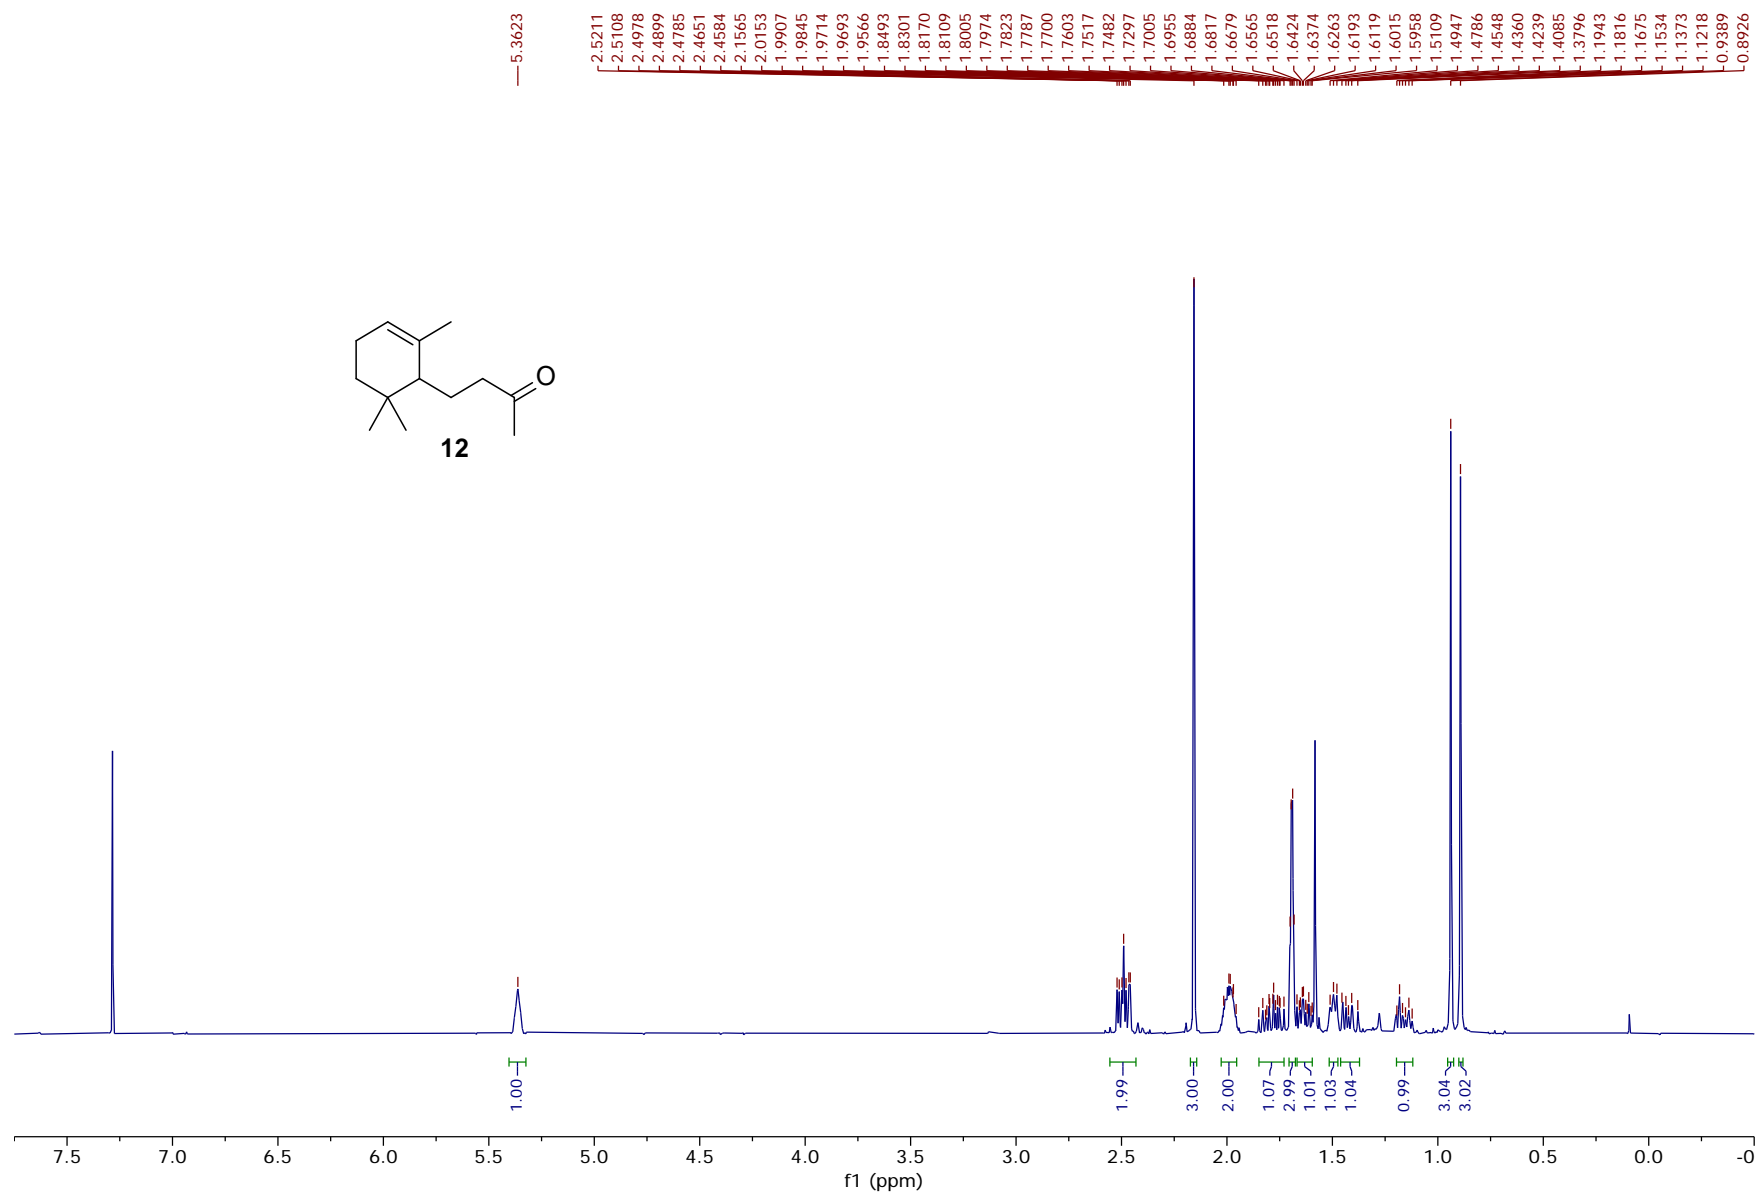

Figure S1

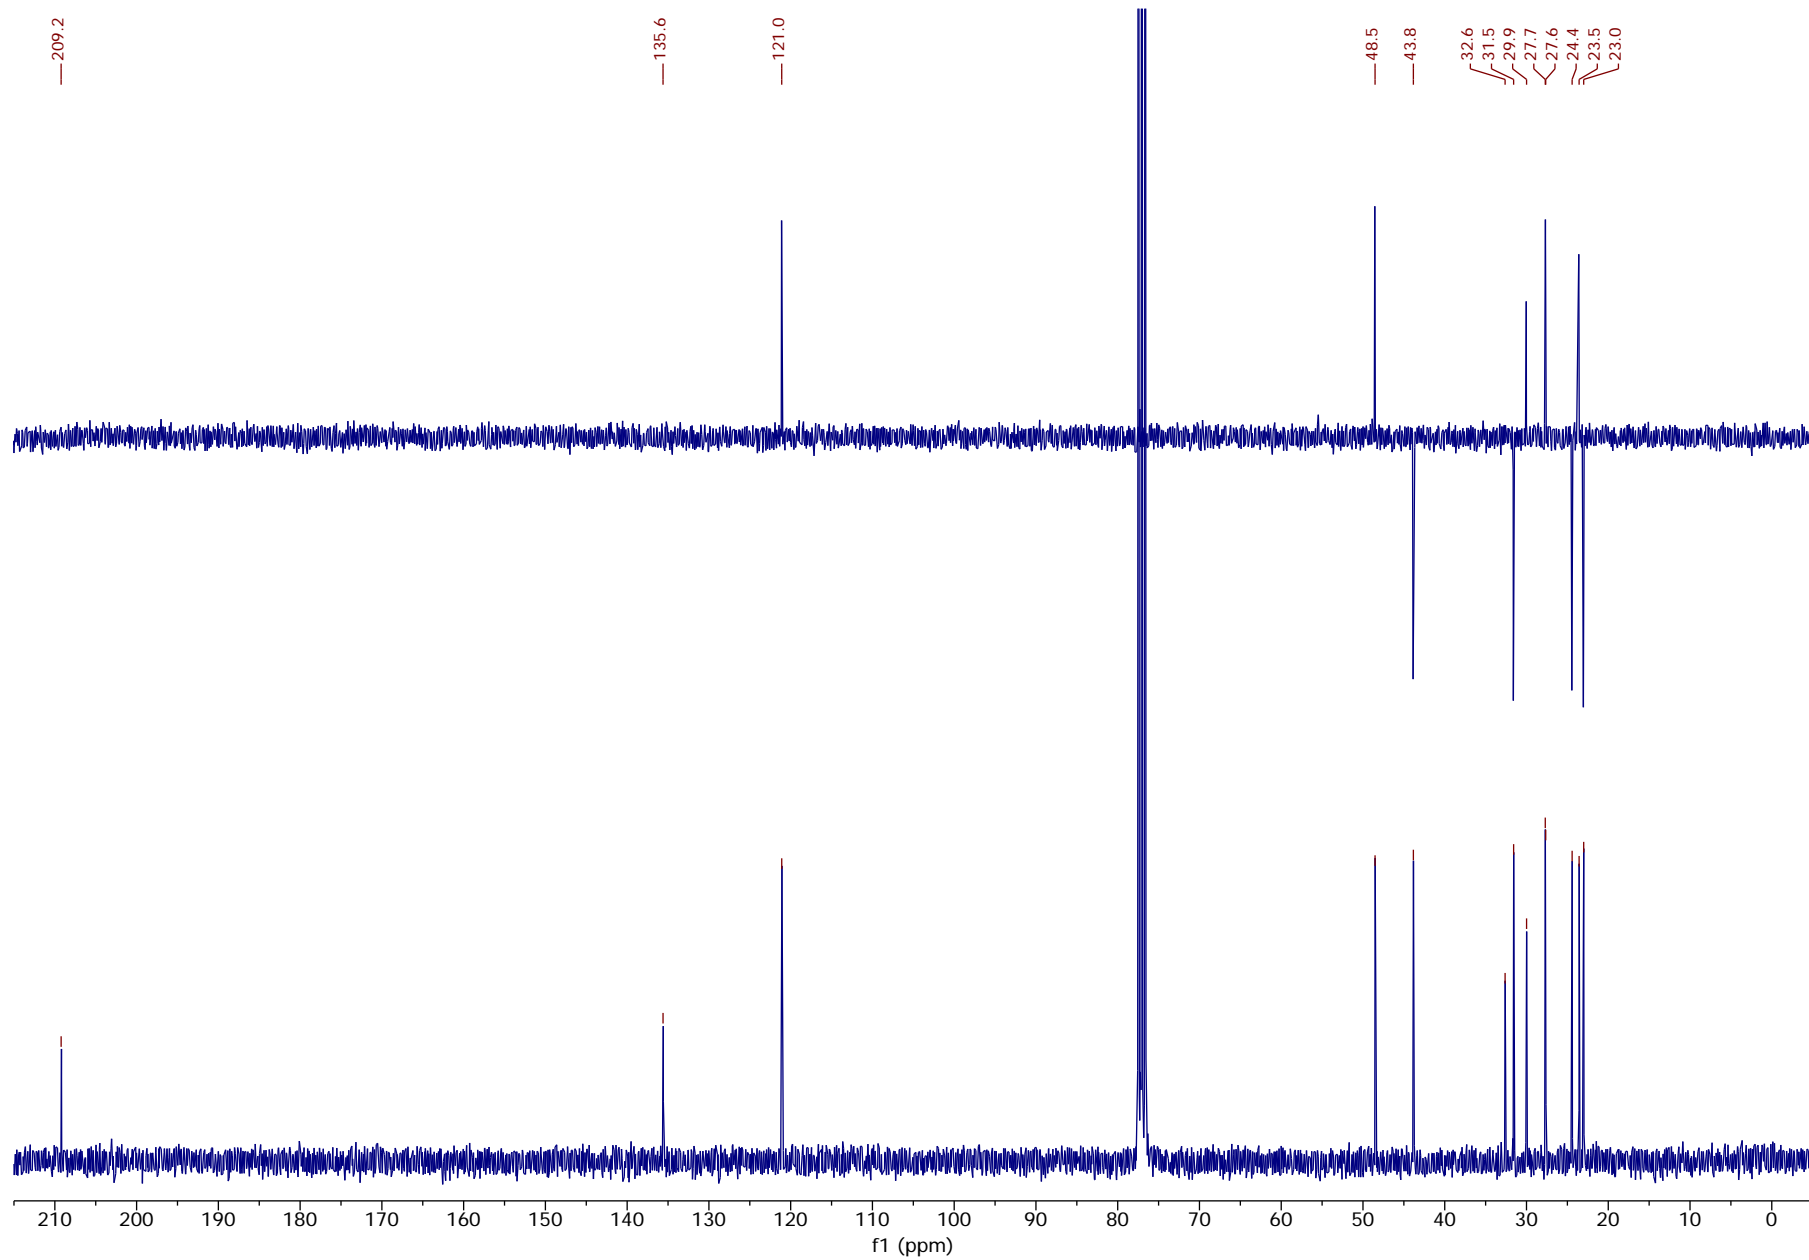

Figure S2

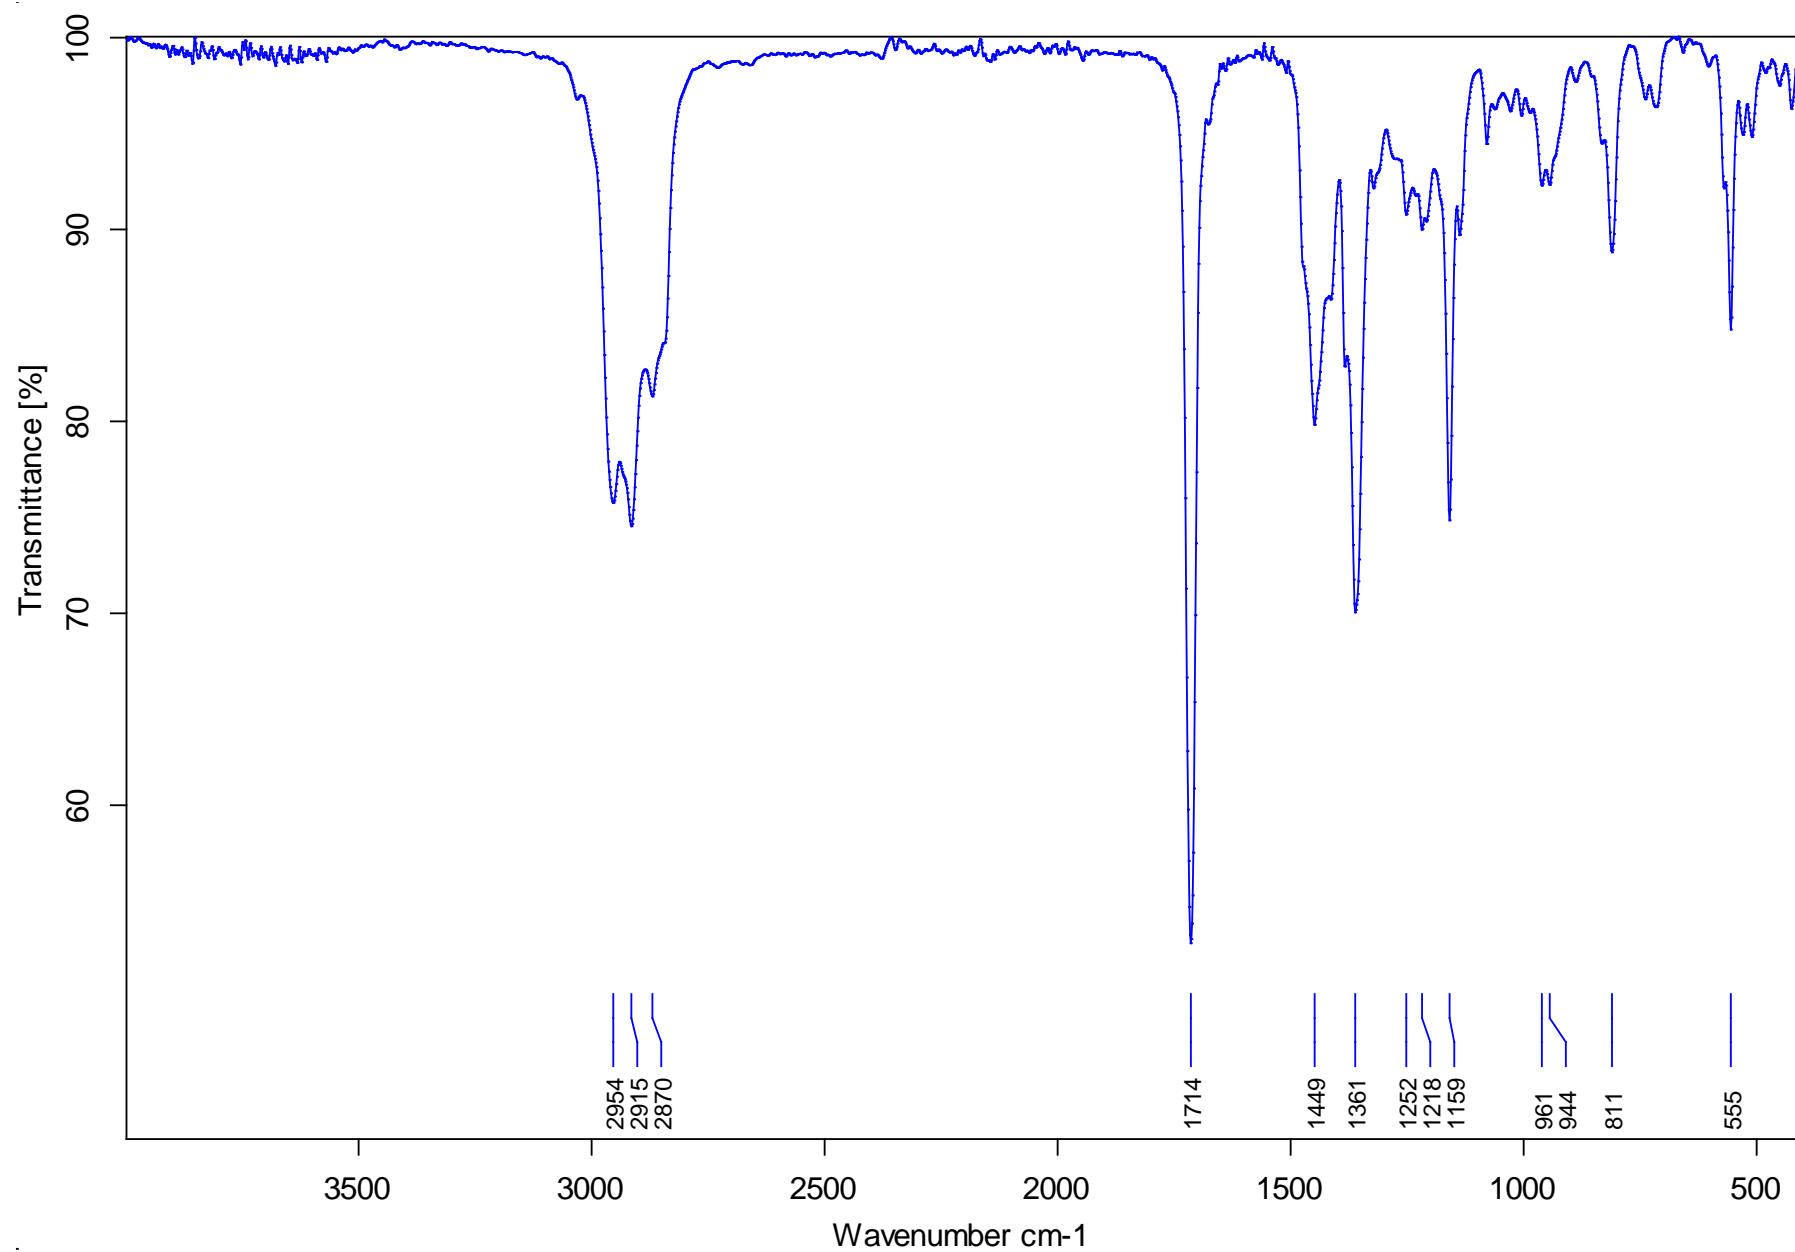

Figure S3

**$^1\text{H}$  NMR, DEPT 135,  $^{13}\text{C}$  NMR, HSQC, HMBC, COSY and IR of *cis*-21**

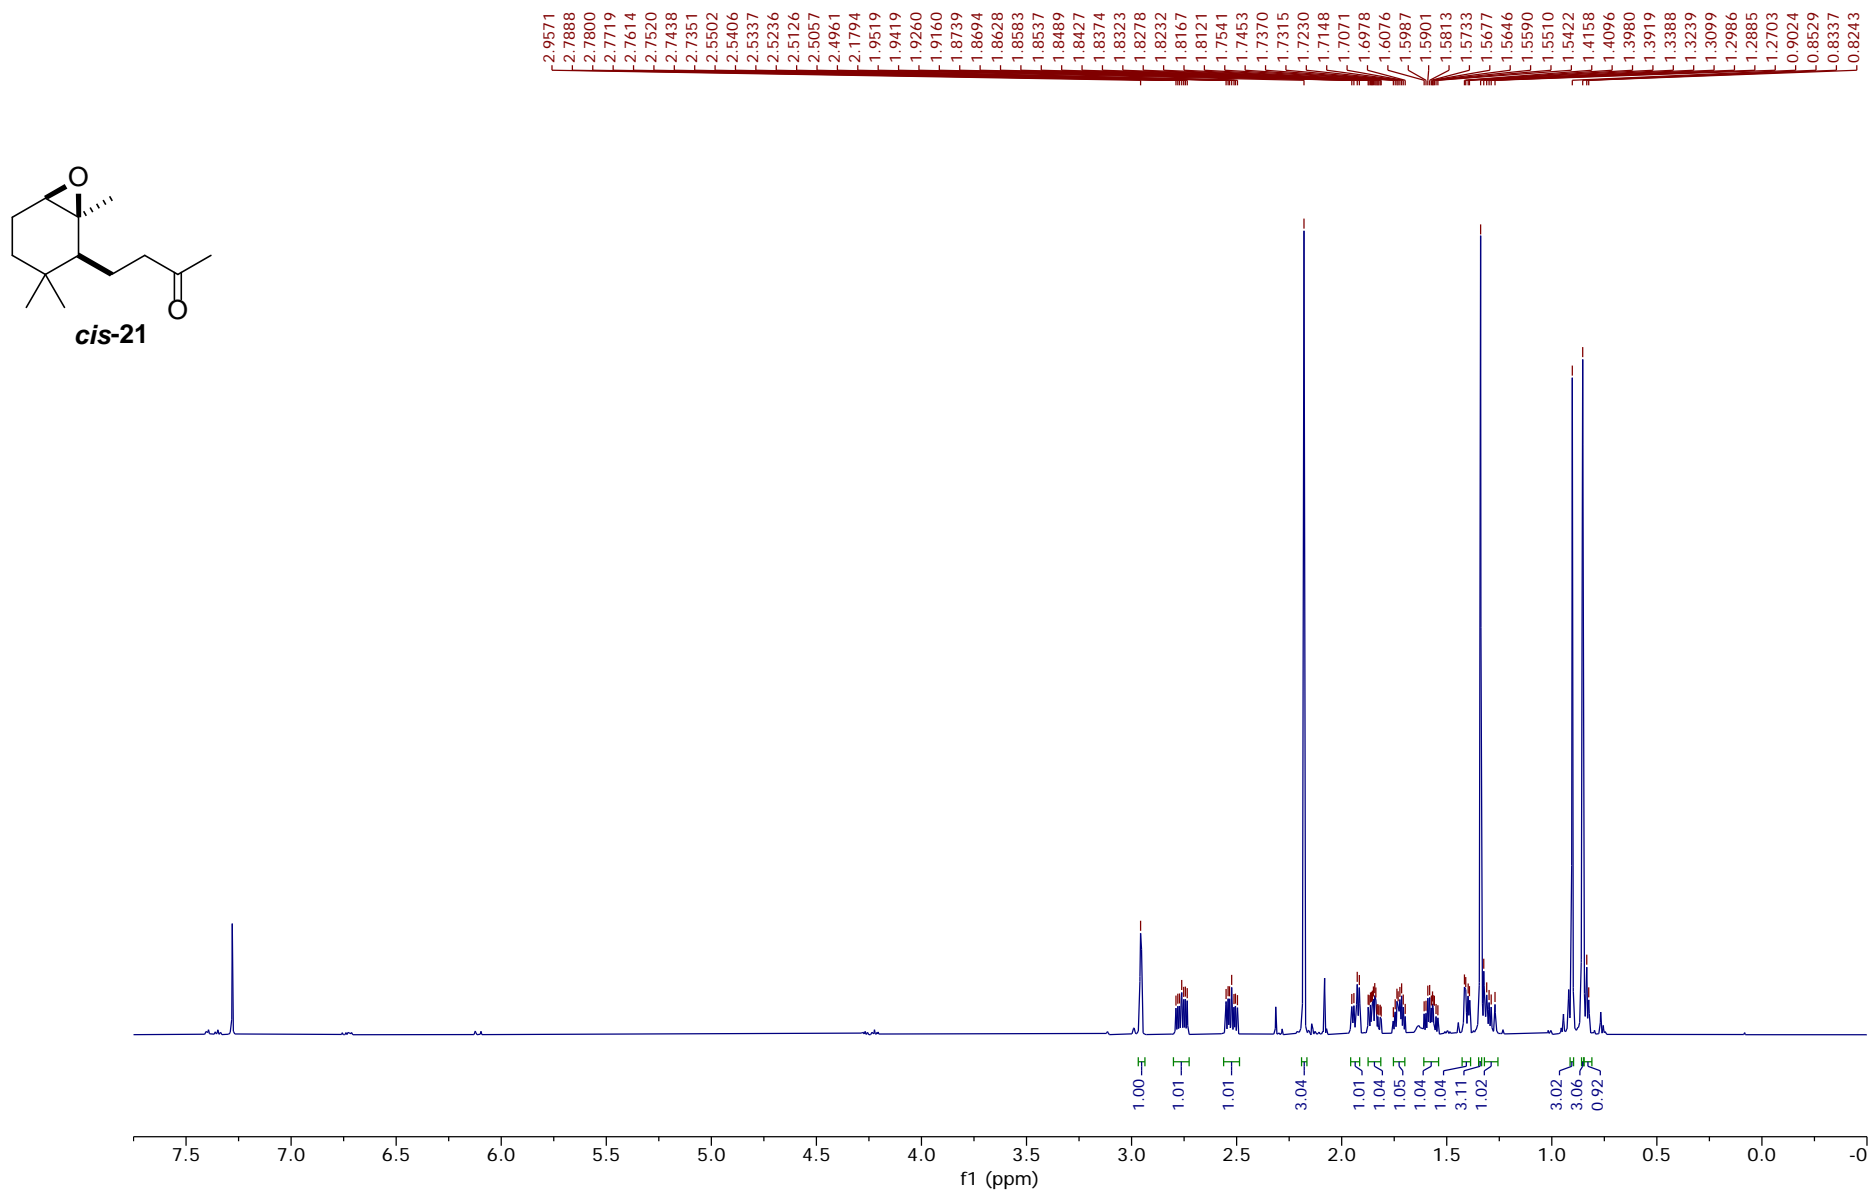

Figure S4

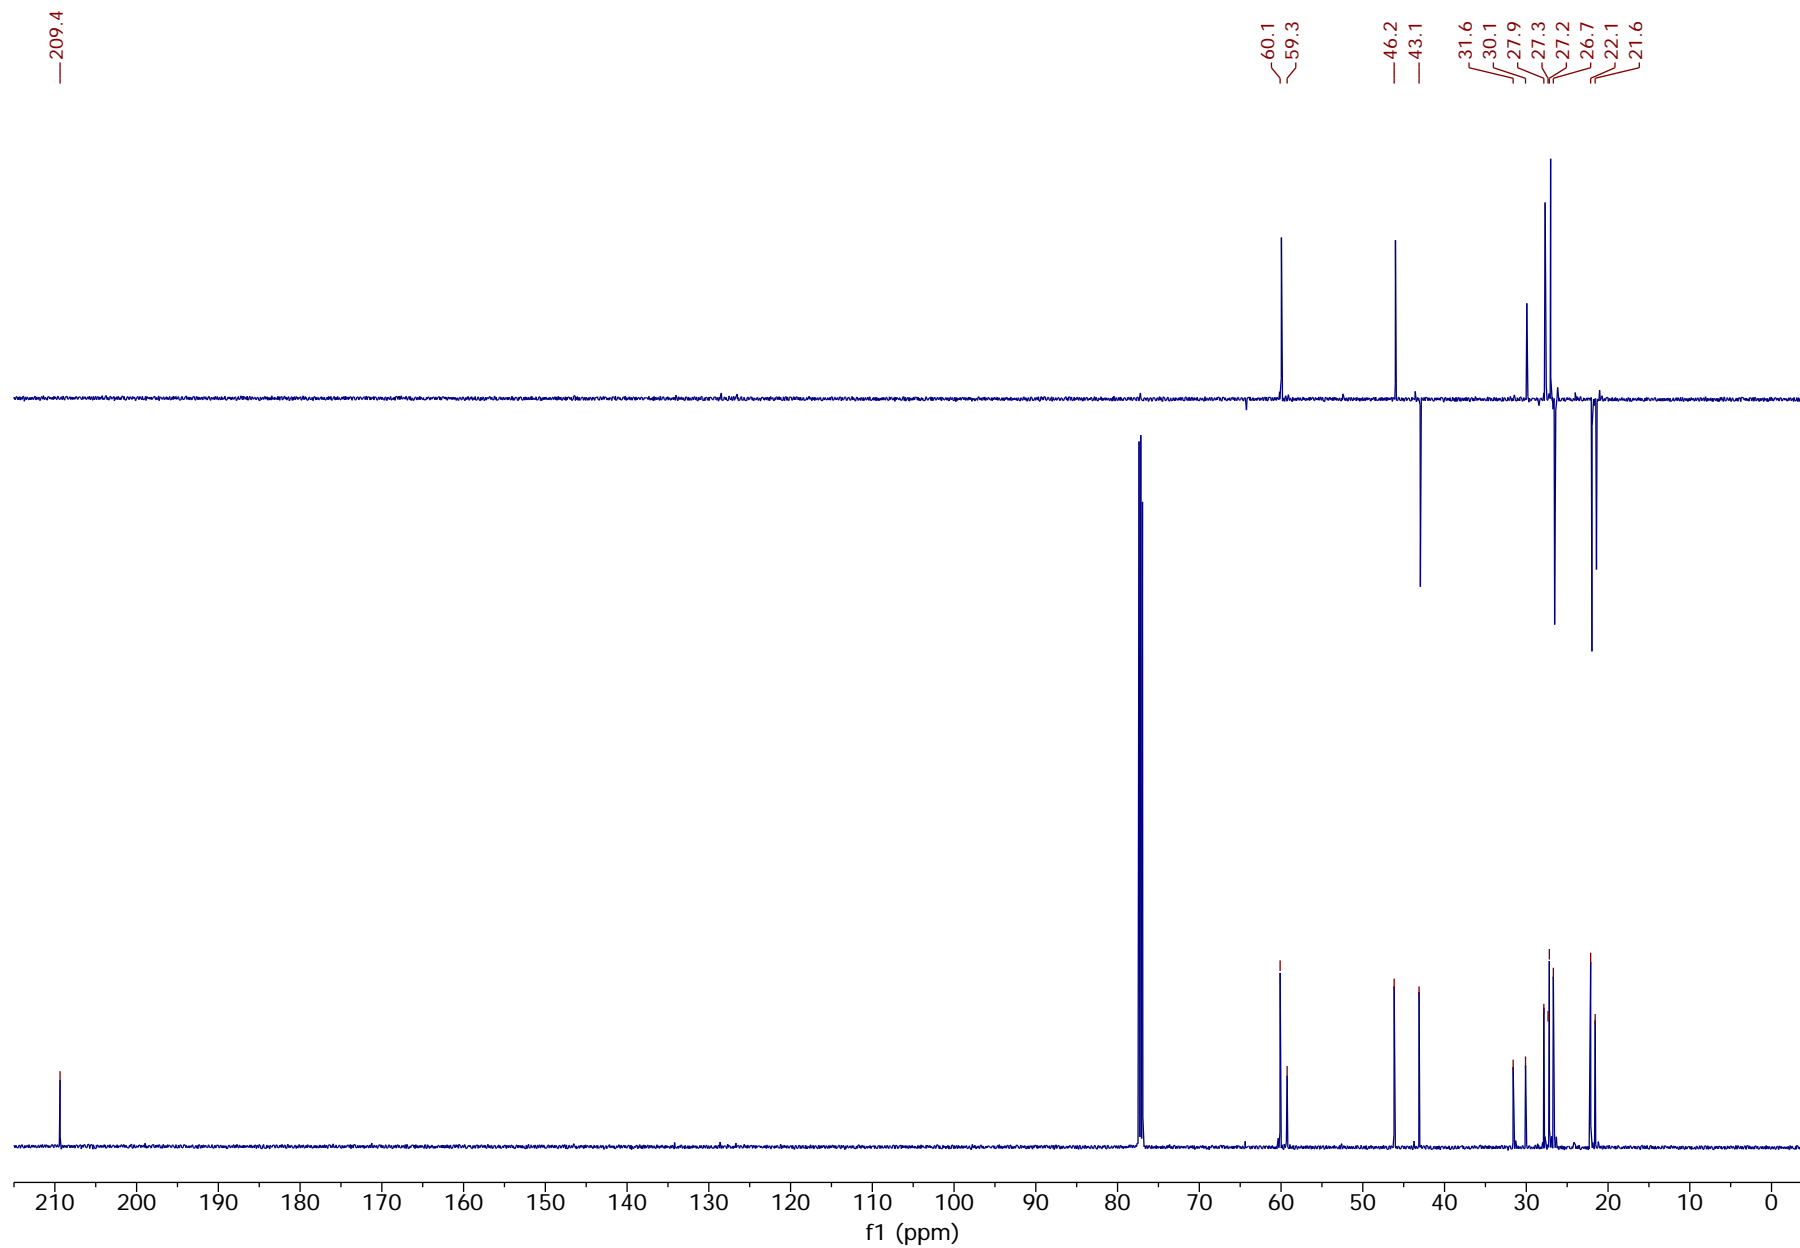

Figure S5

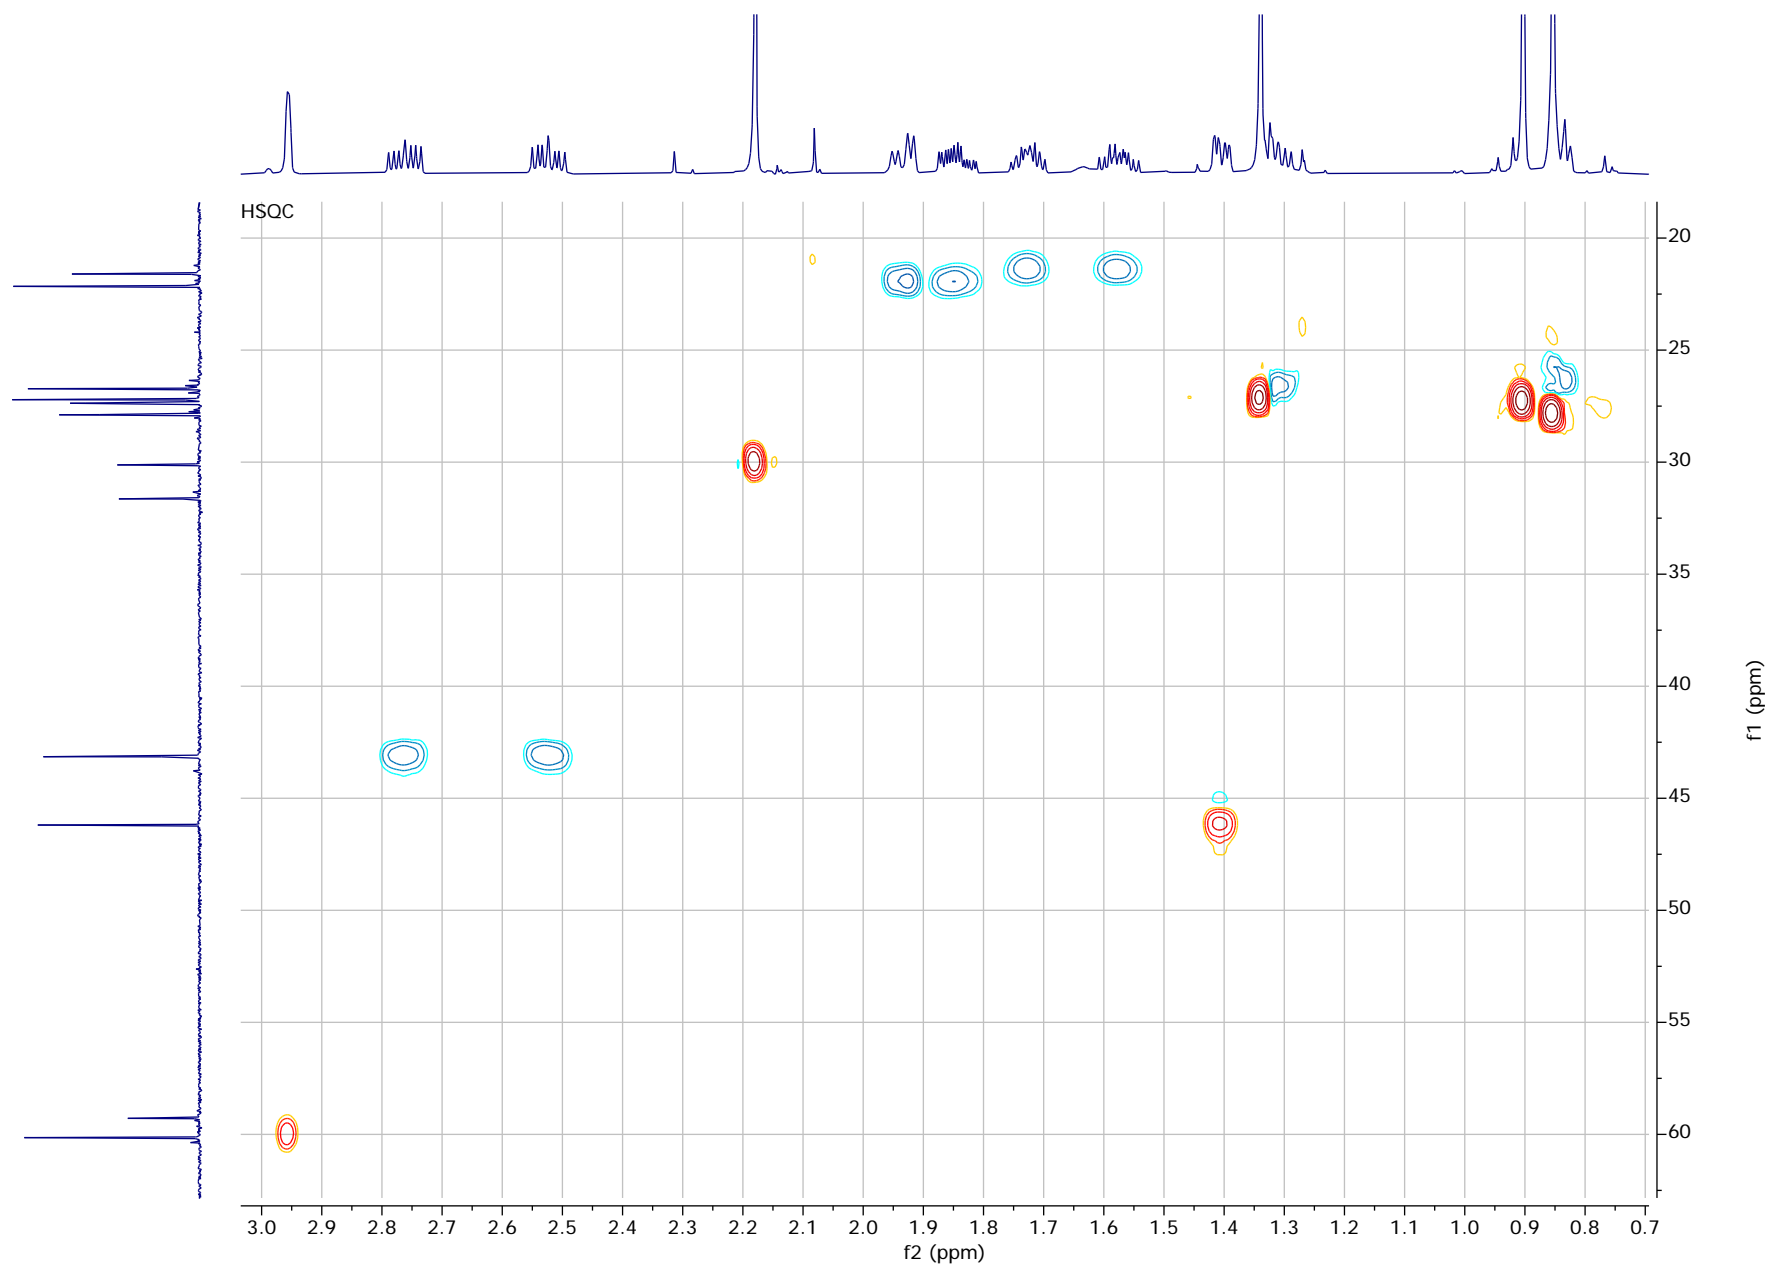

Figure S6

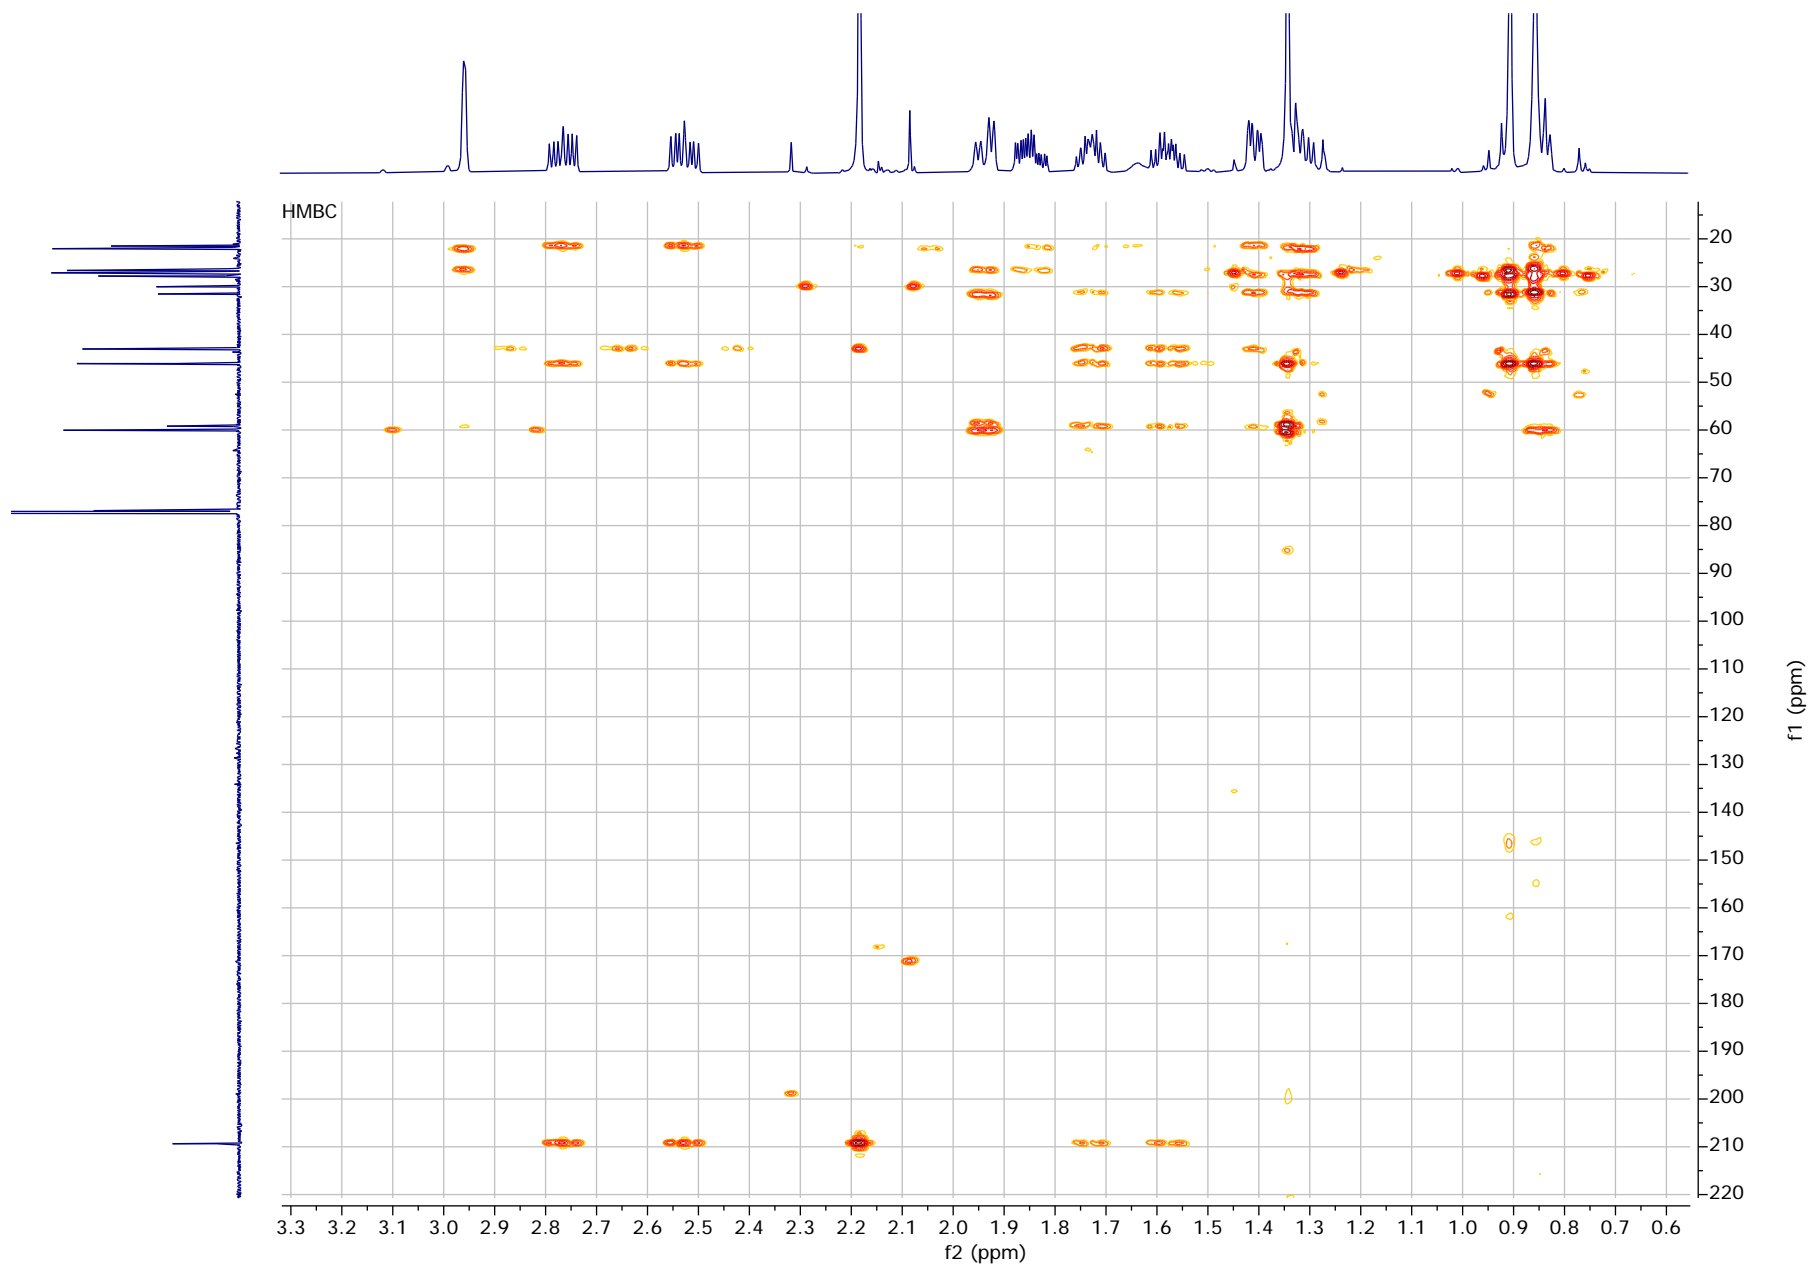

Figure S7



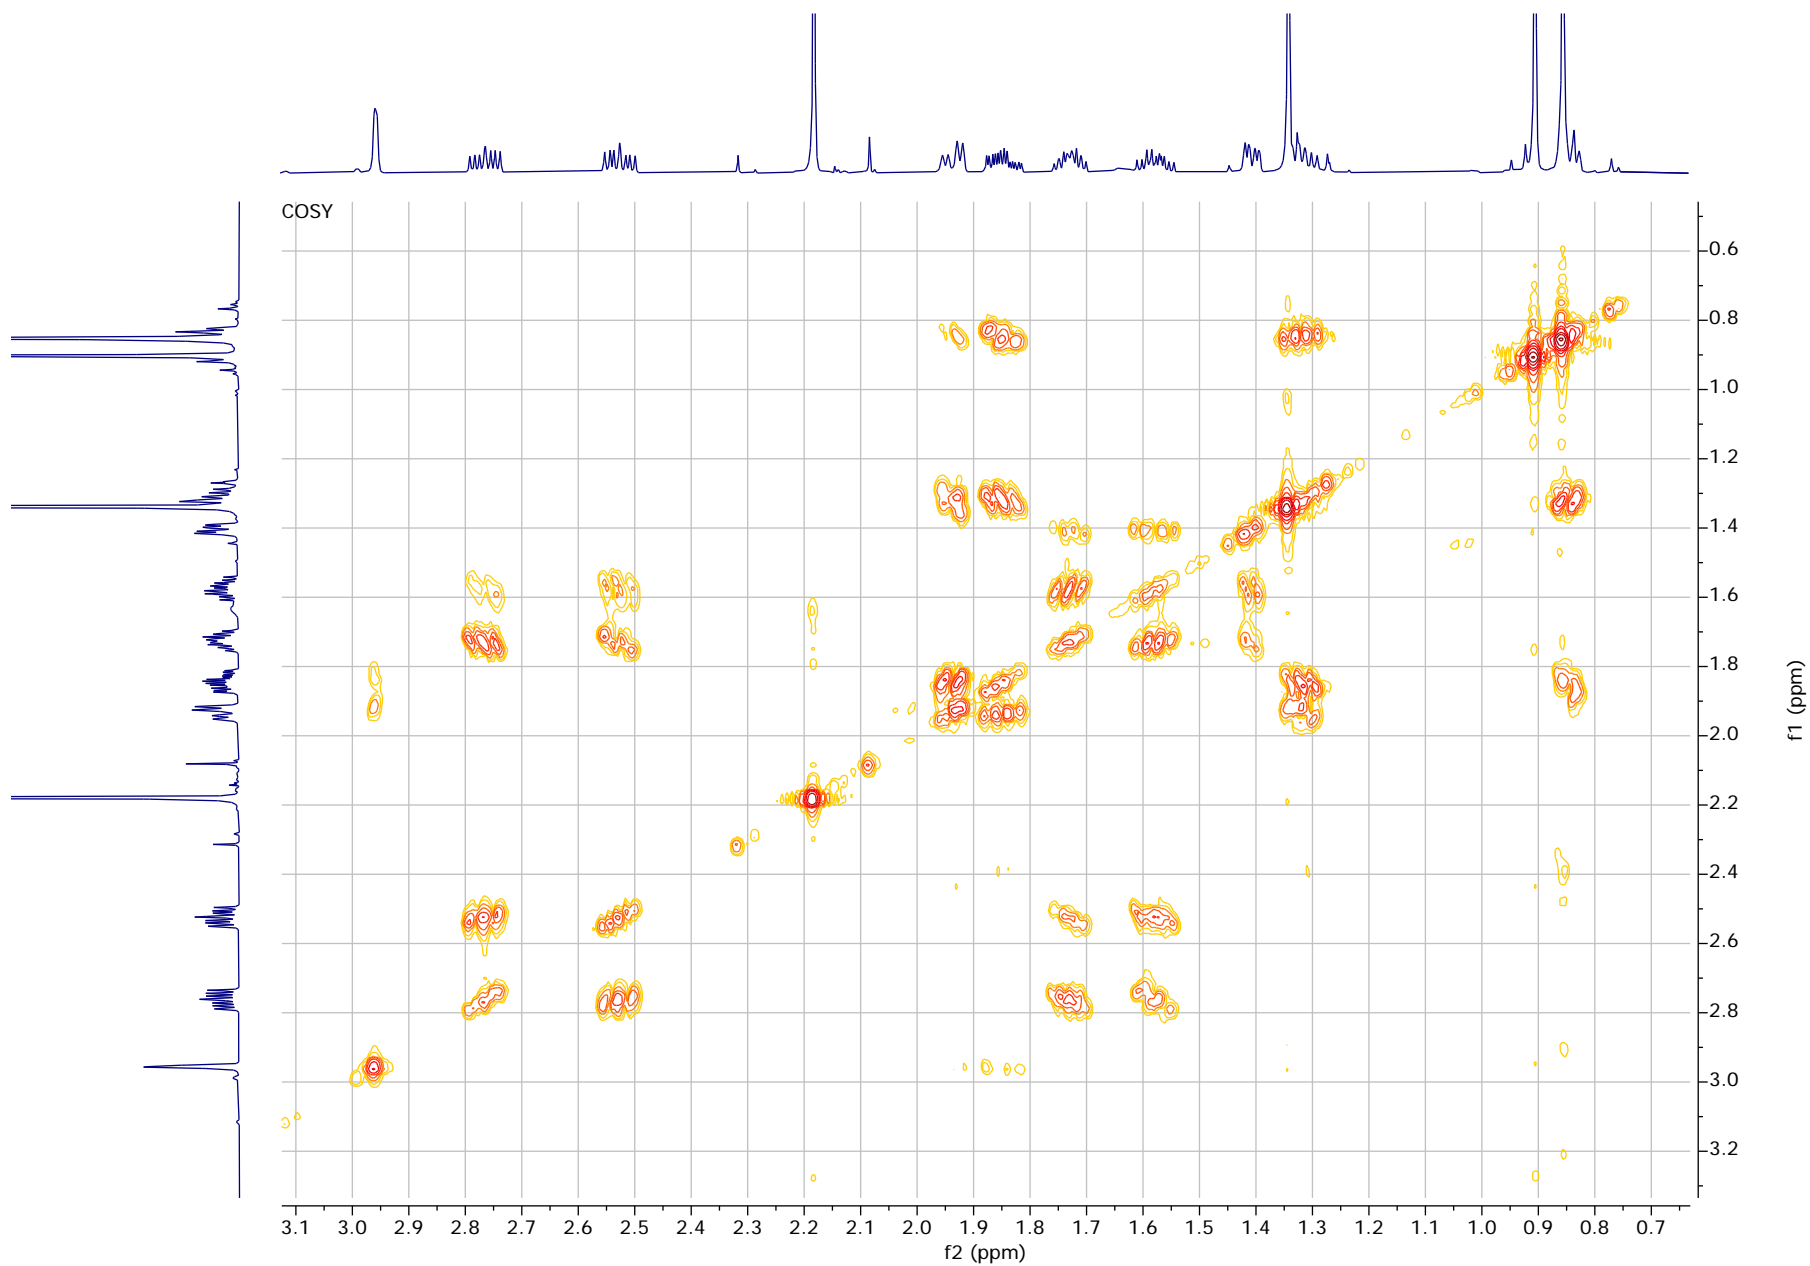

Figure S8

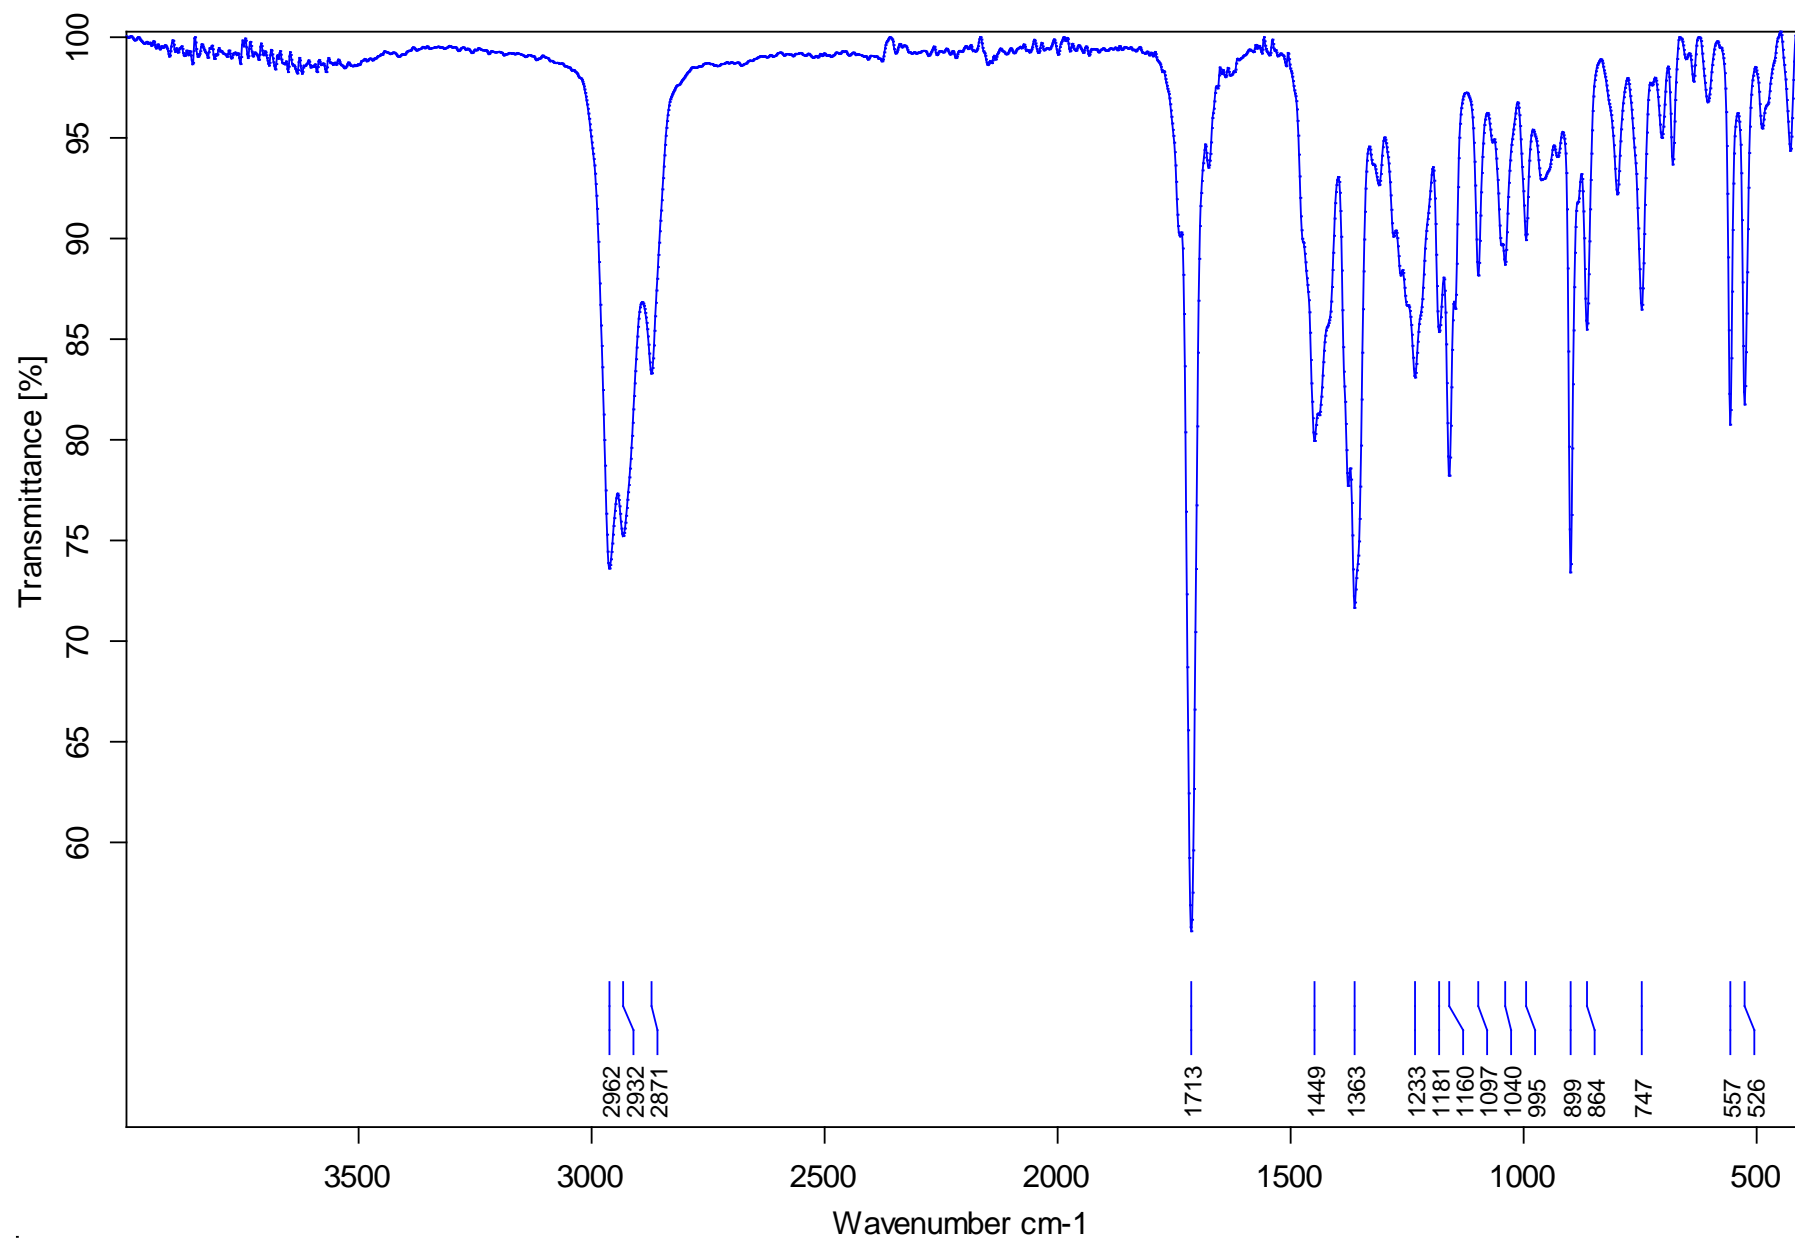

Figure S9

$^1\text{H}$  NMR of a 6.67:1 mixture of *cis*-**21** and *trans*-**21** (reaction crude ratio)

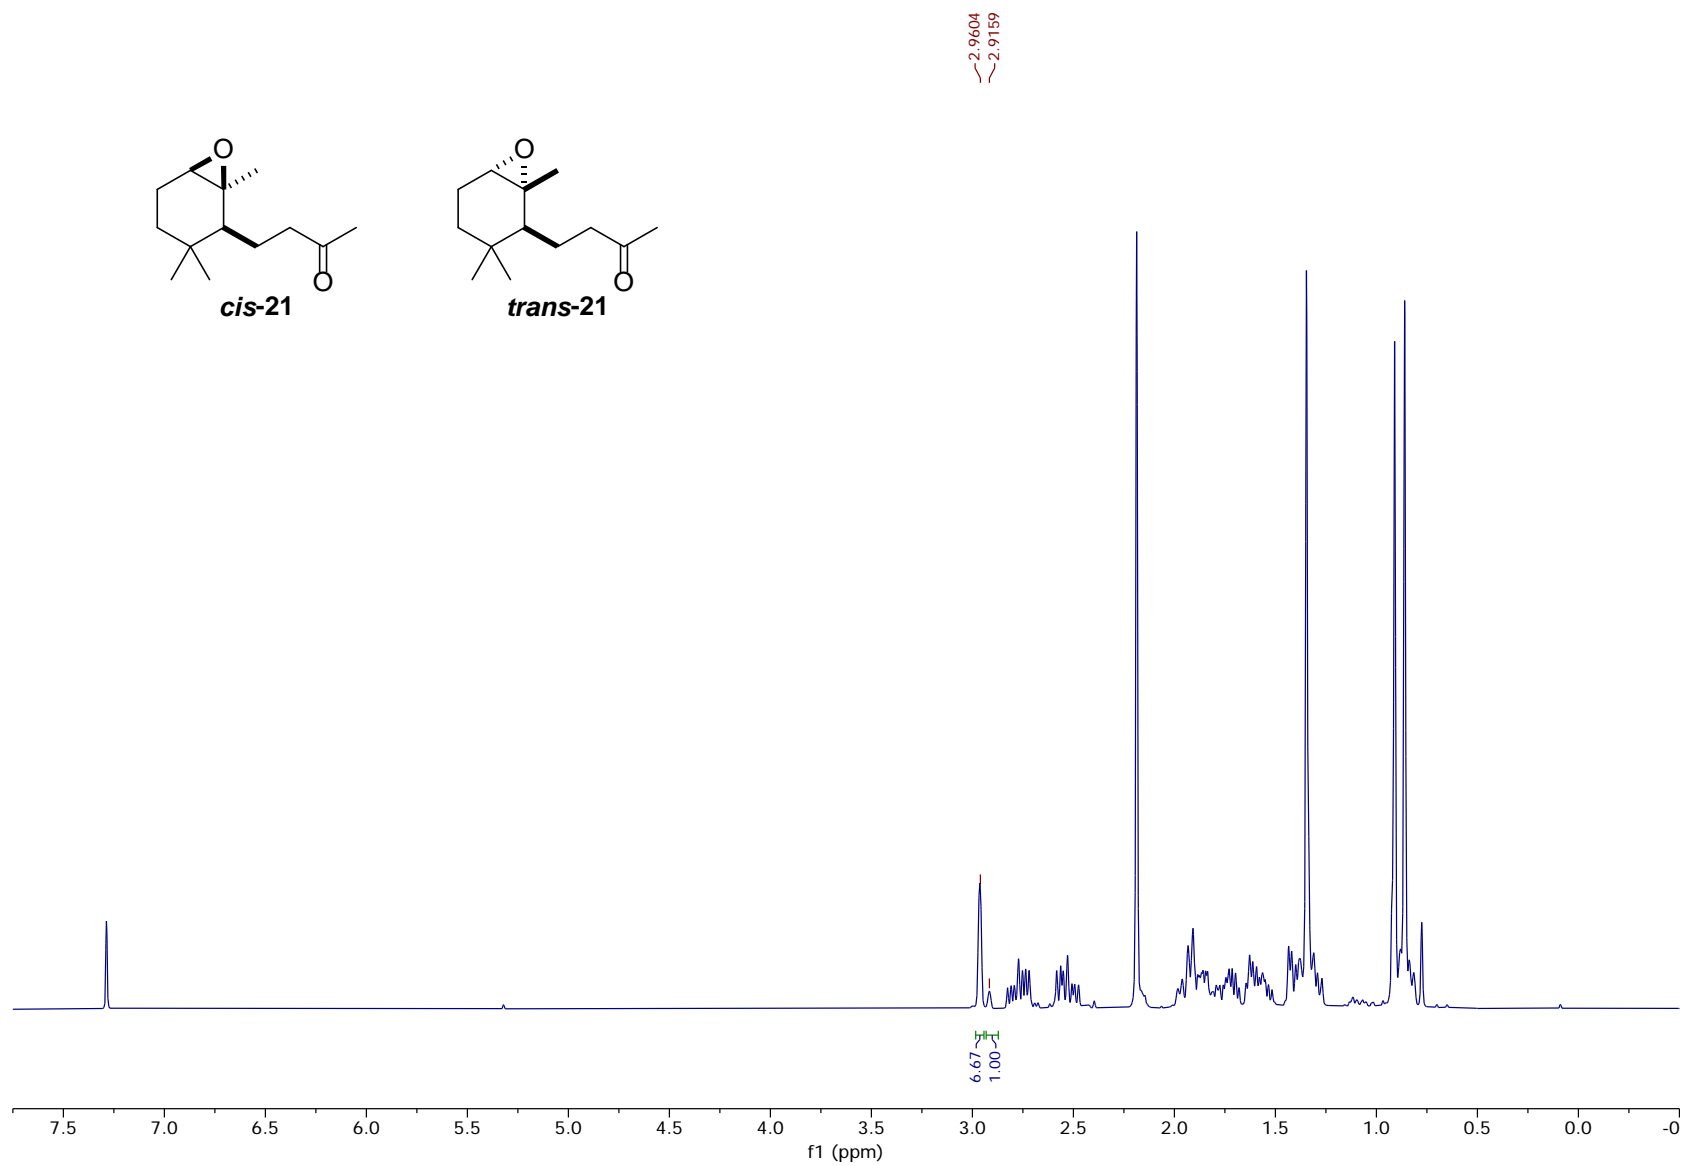

Figure S10

**$^1\text{H}$  NMR, DEPT 135,  $^{13}\text{C}$  NMR, HSQC, HMBC, COSY, NOESY 1D and IR of 23**

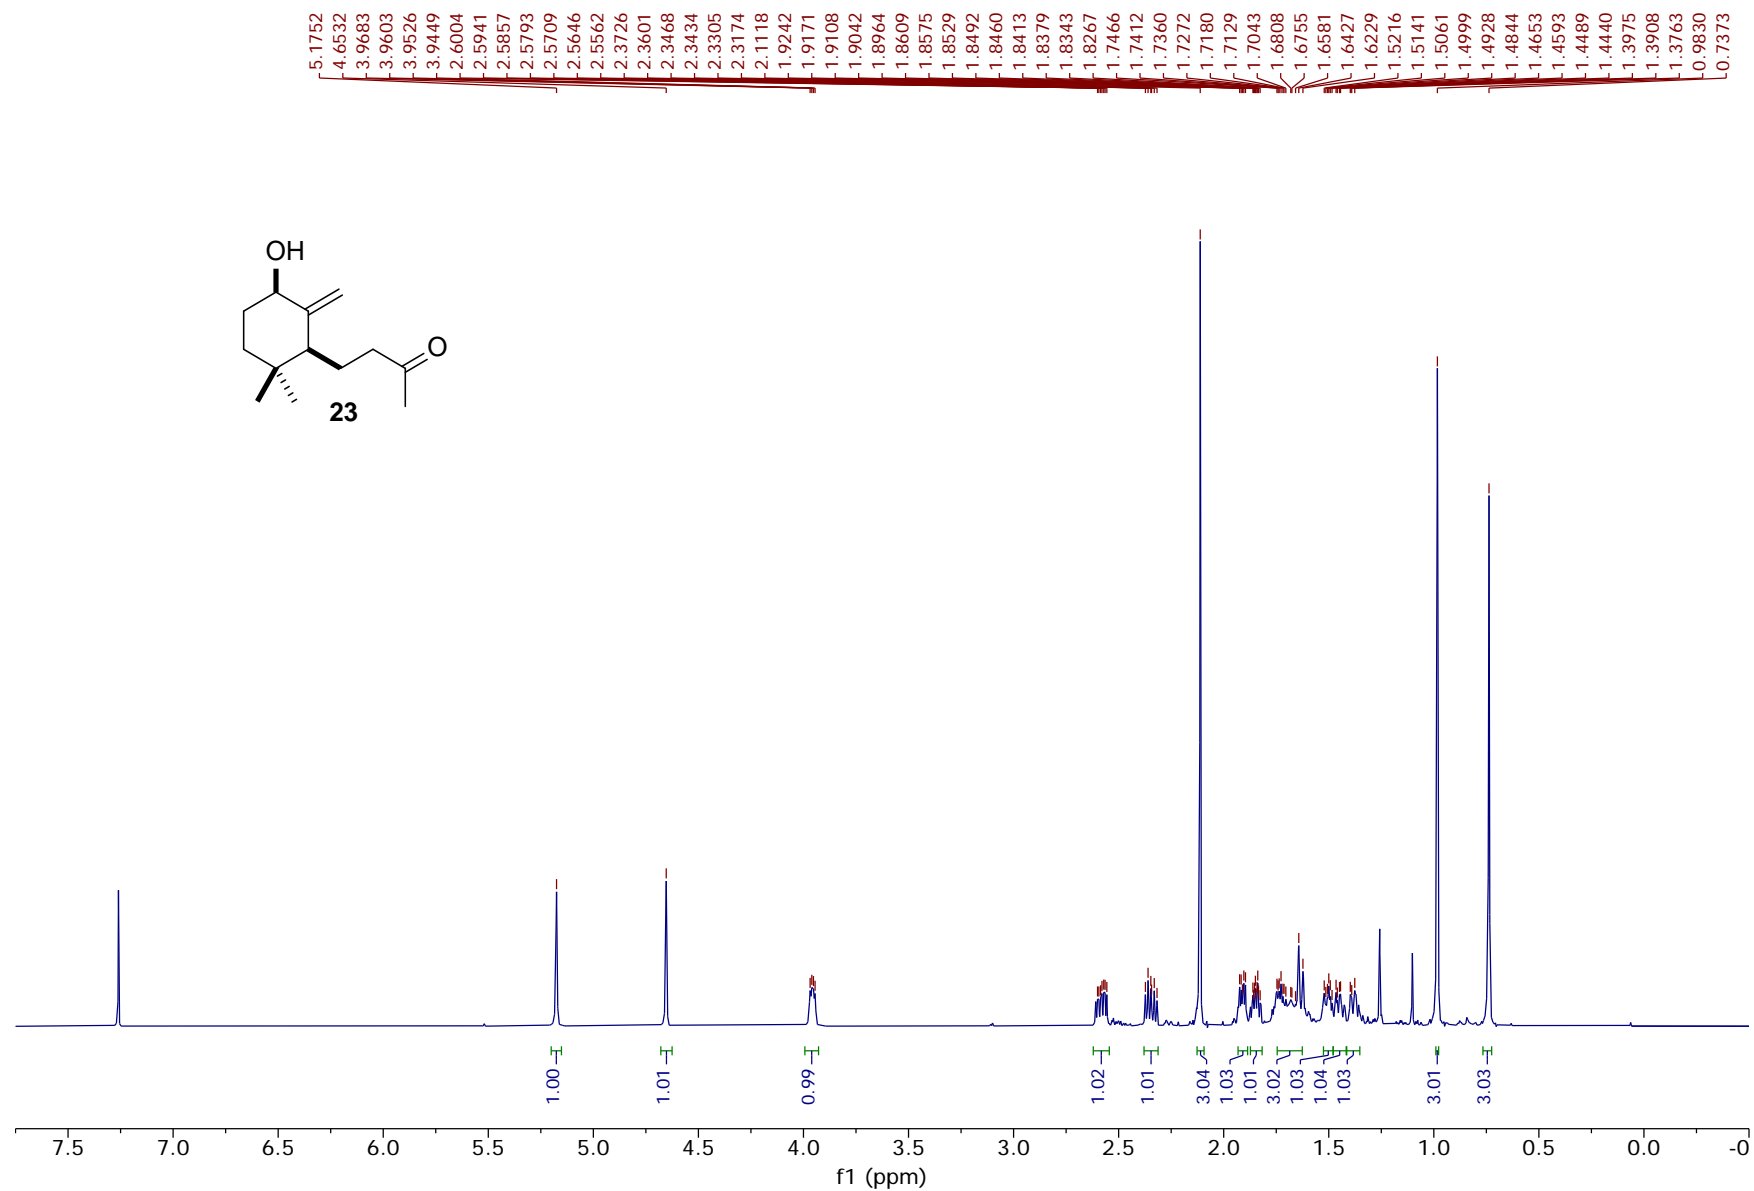

Figure S11

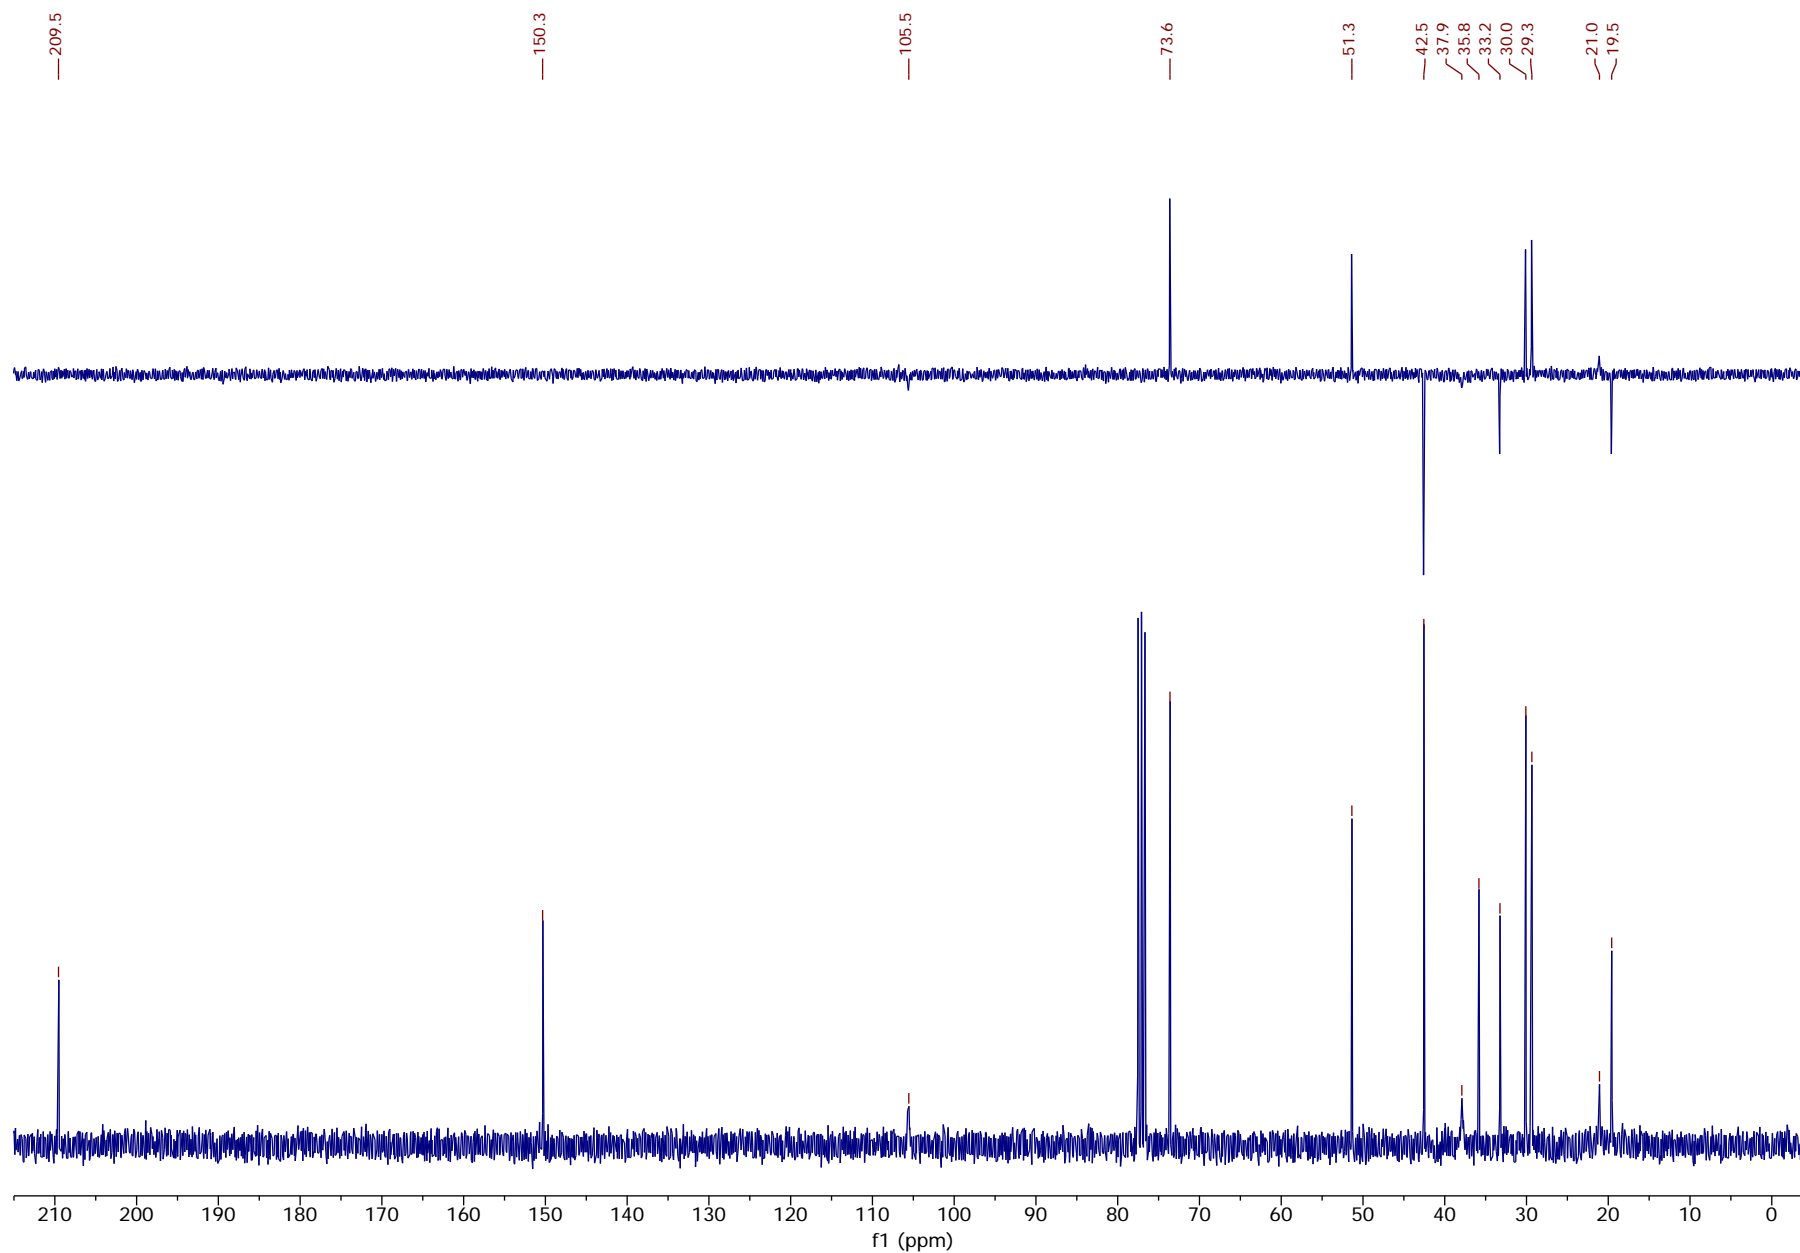

Figure S12

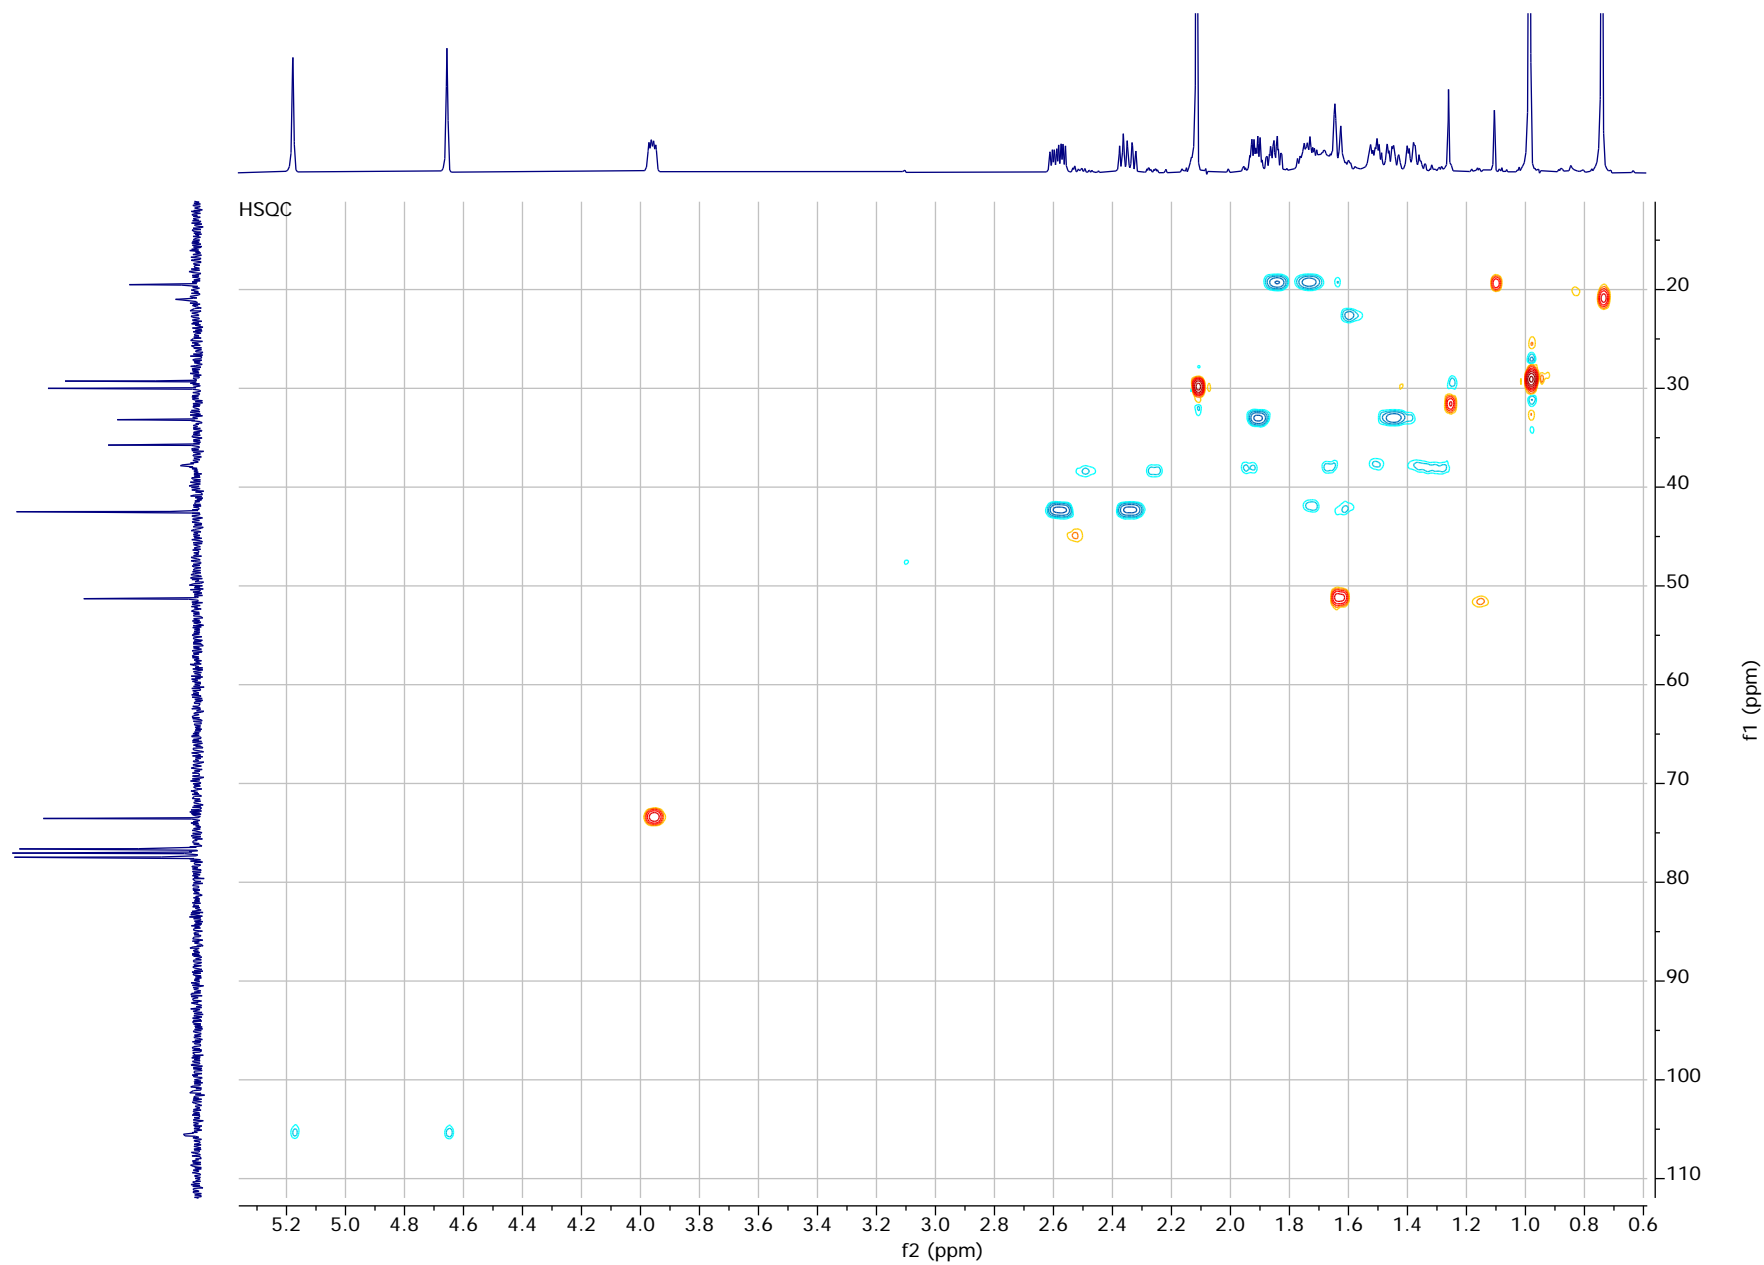

Figure S13

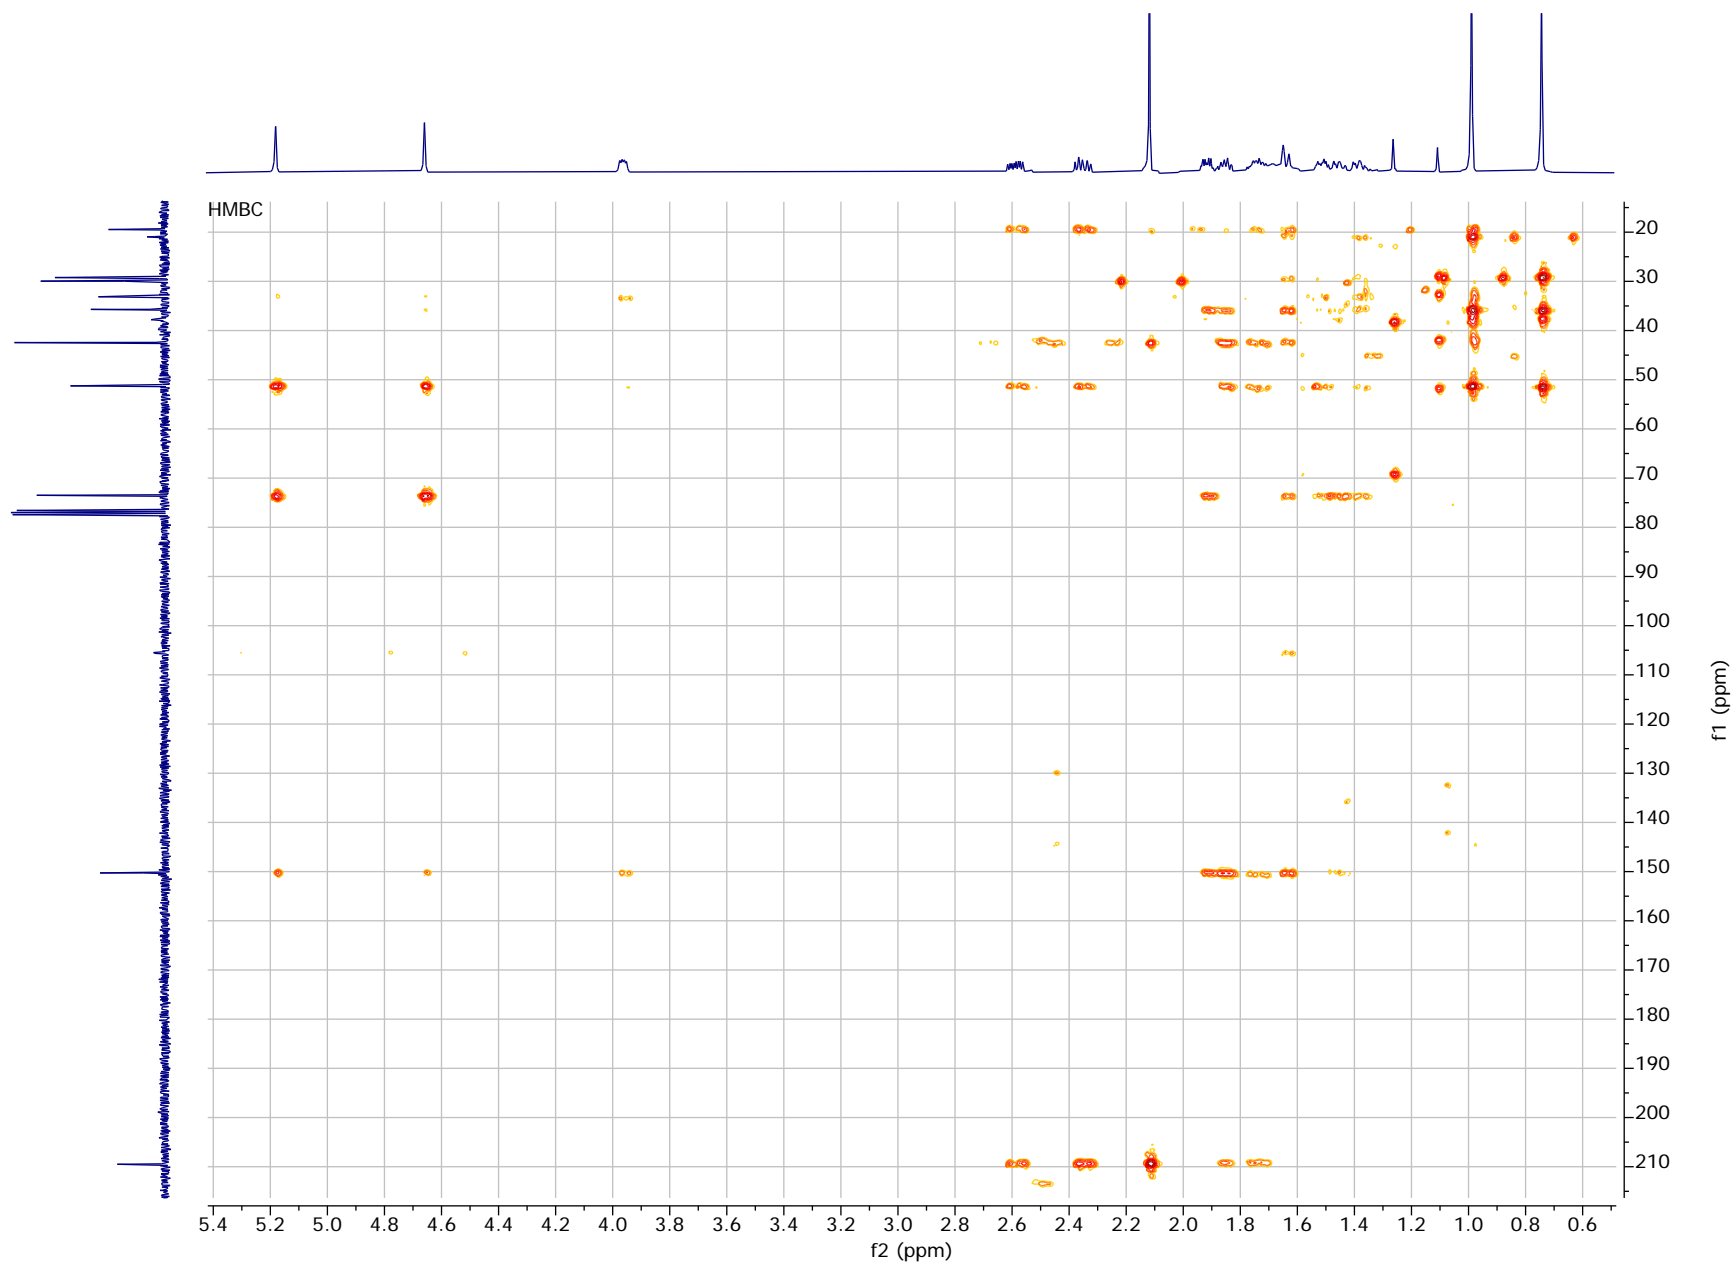

Figure S14

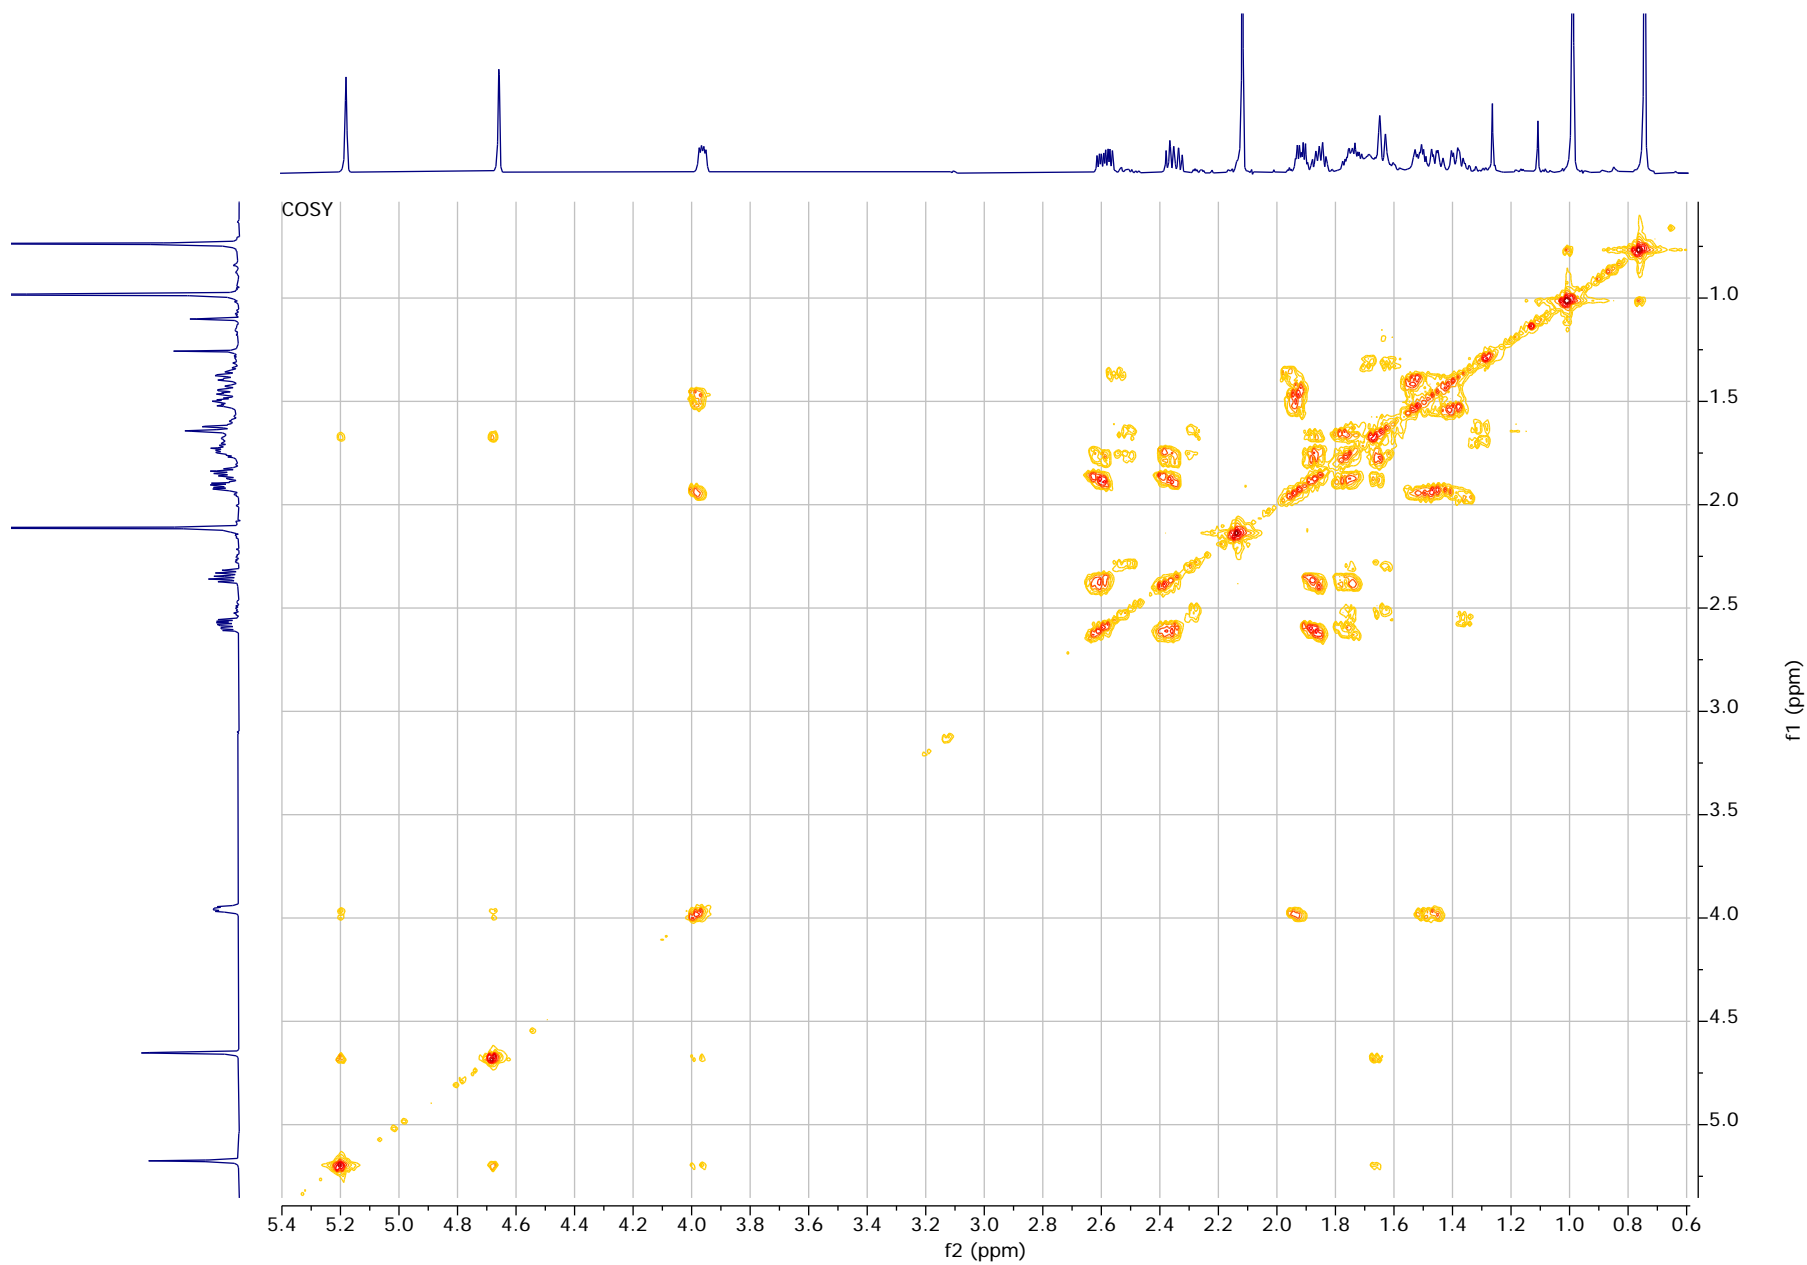

Figure S15



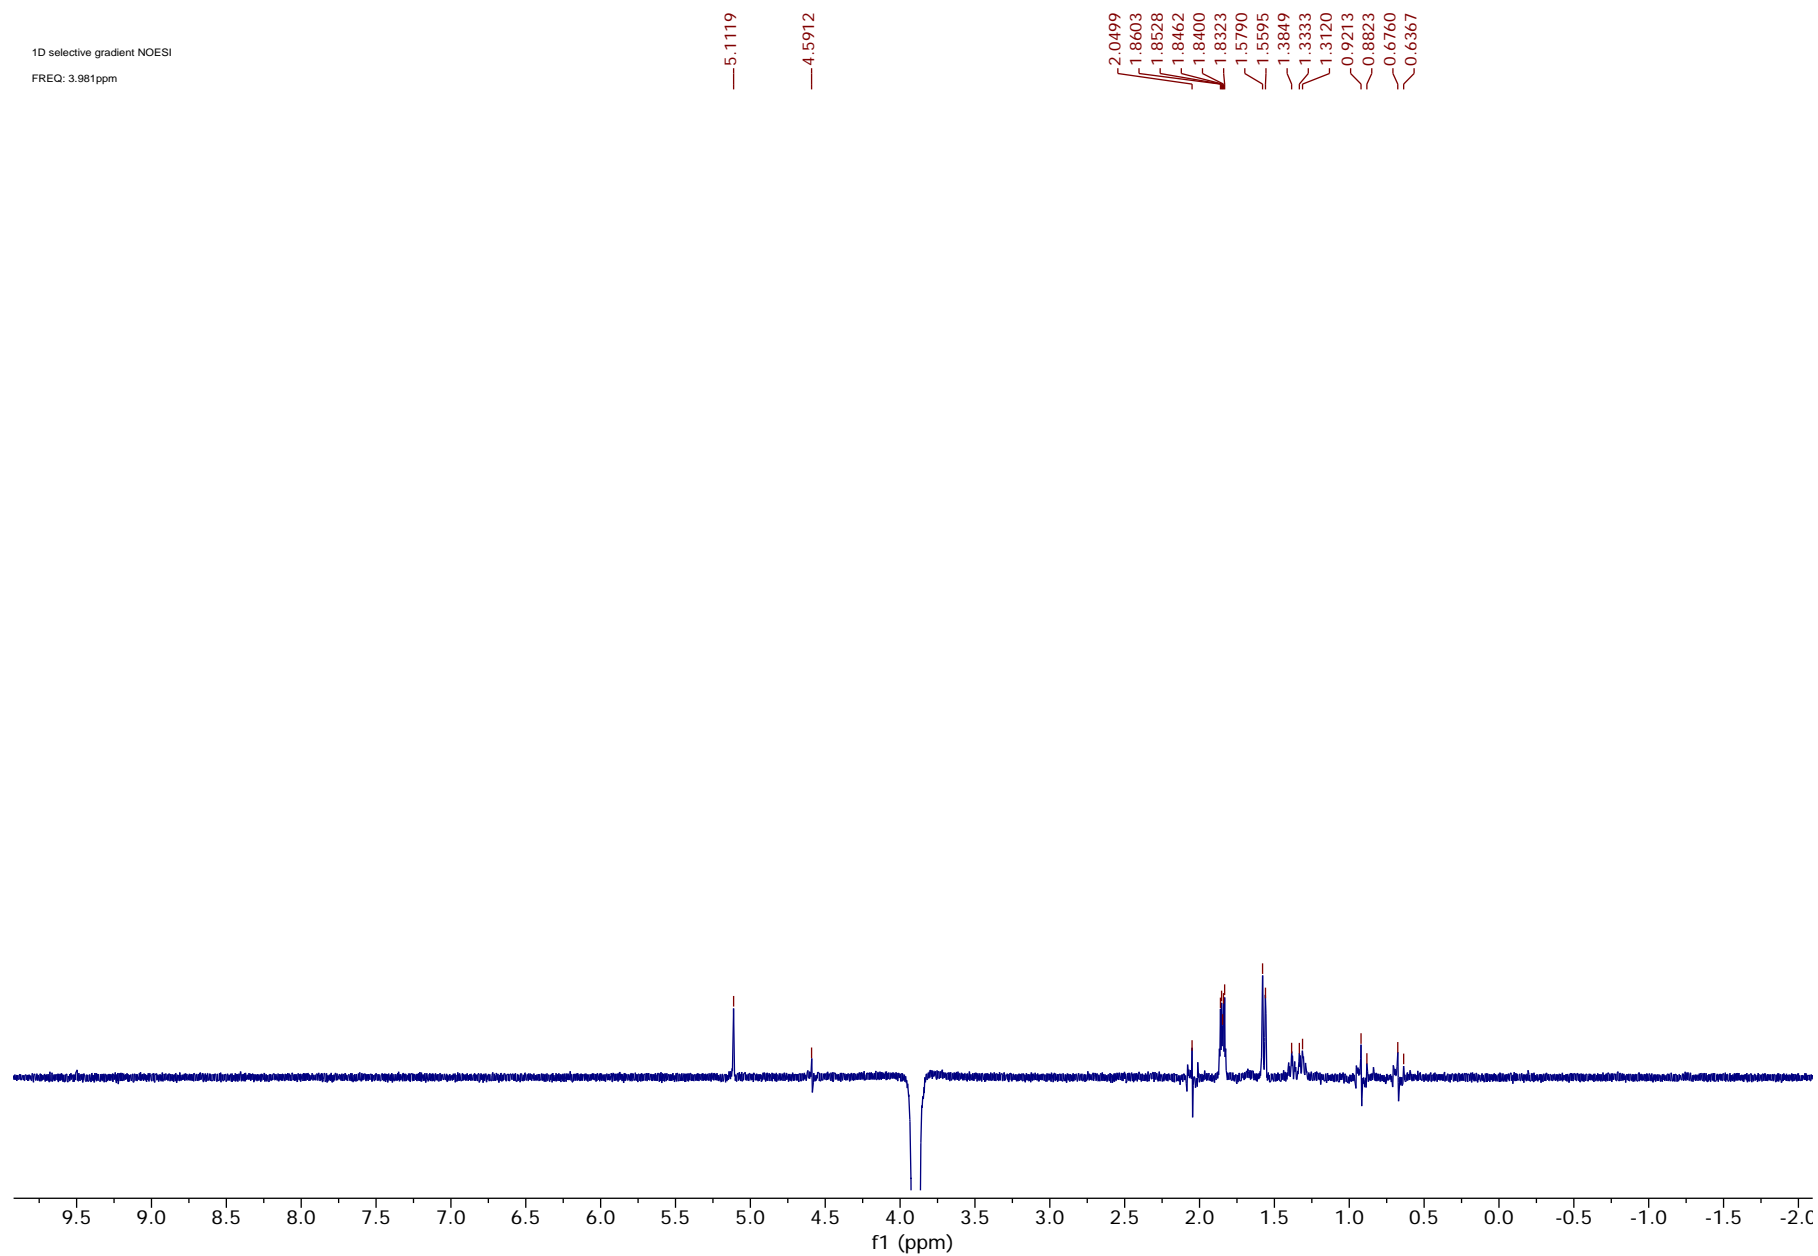

Figure S16

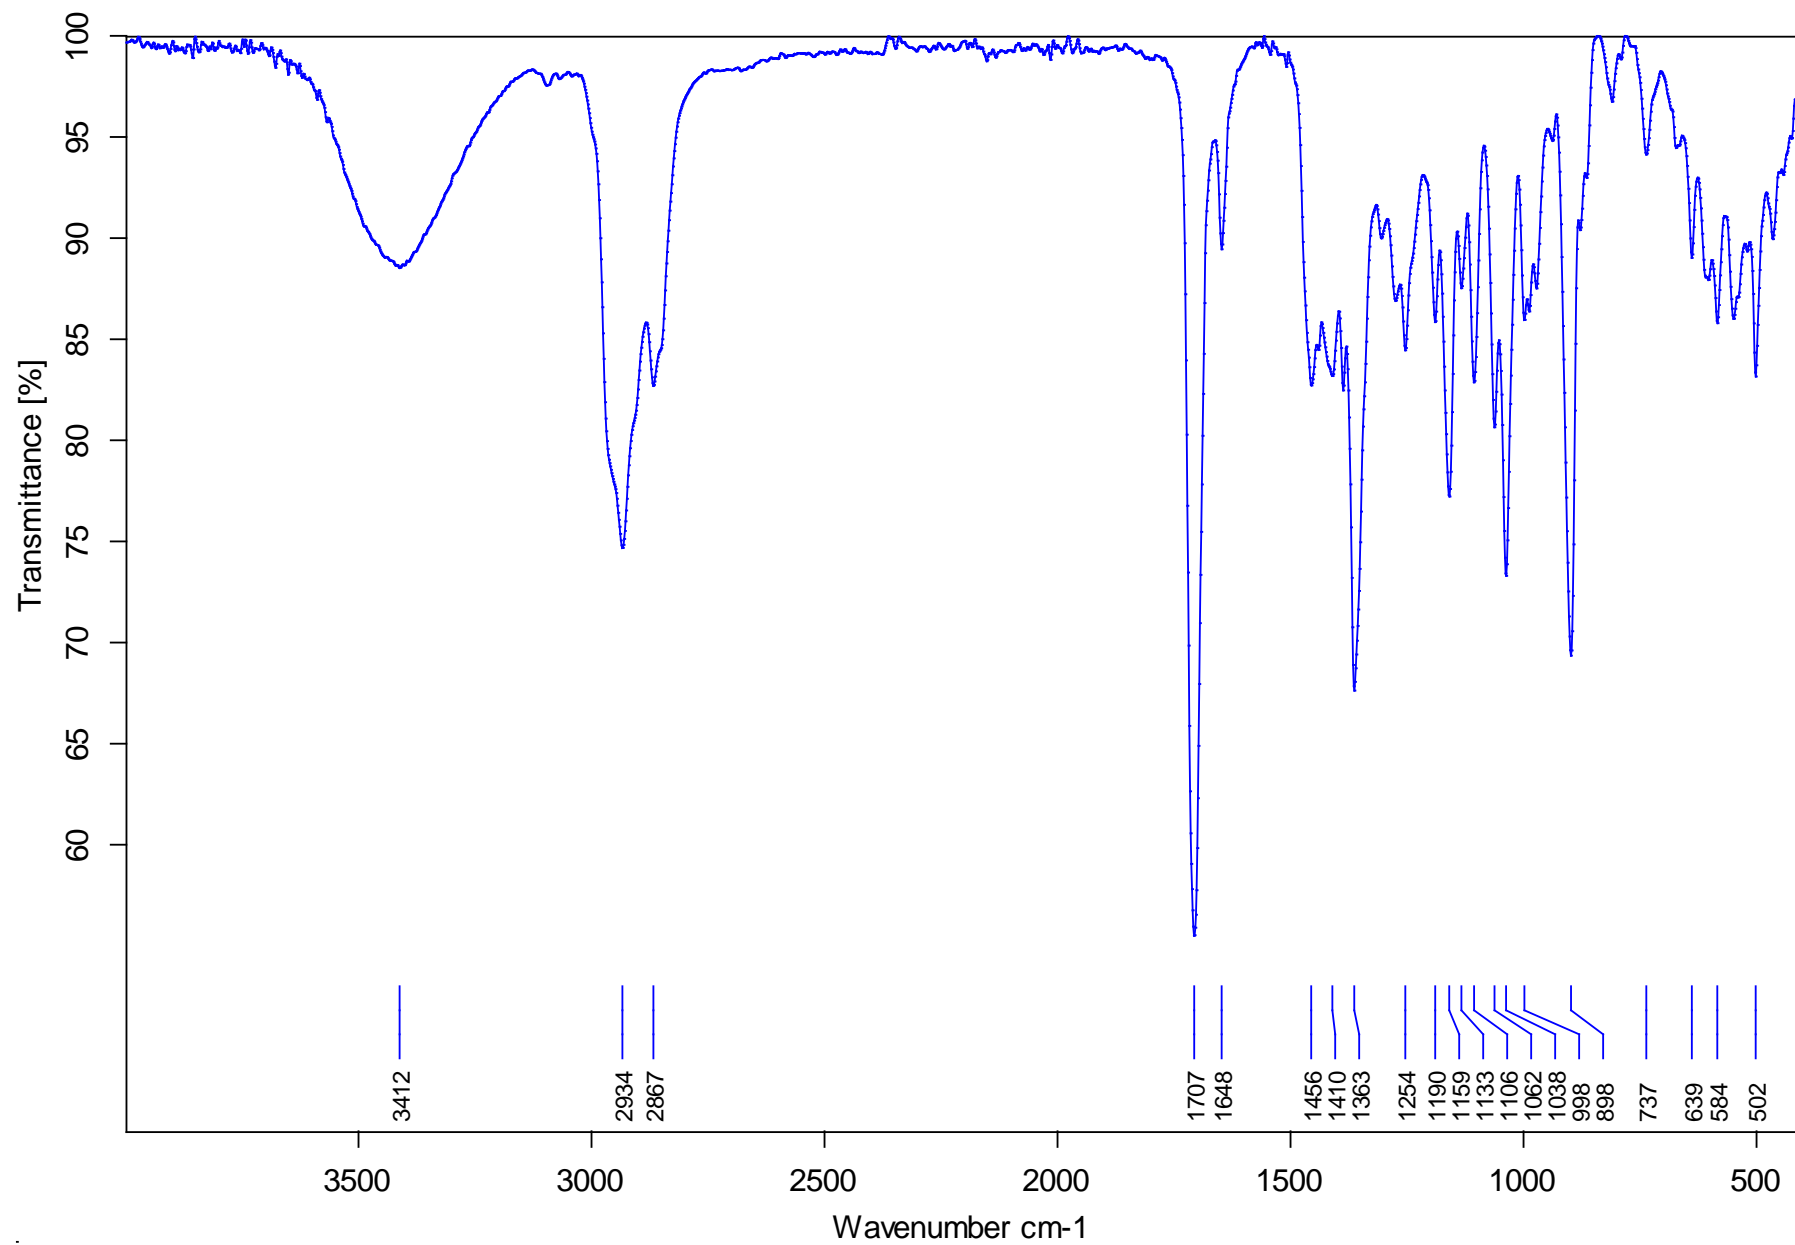

Figure S17

**$^1\text{H}$  NMR, DEPT 135,  $^{13}\text{C}$  NMR, HSQC and IR of 20**

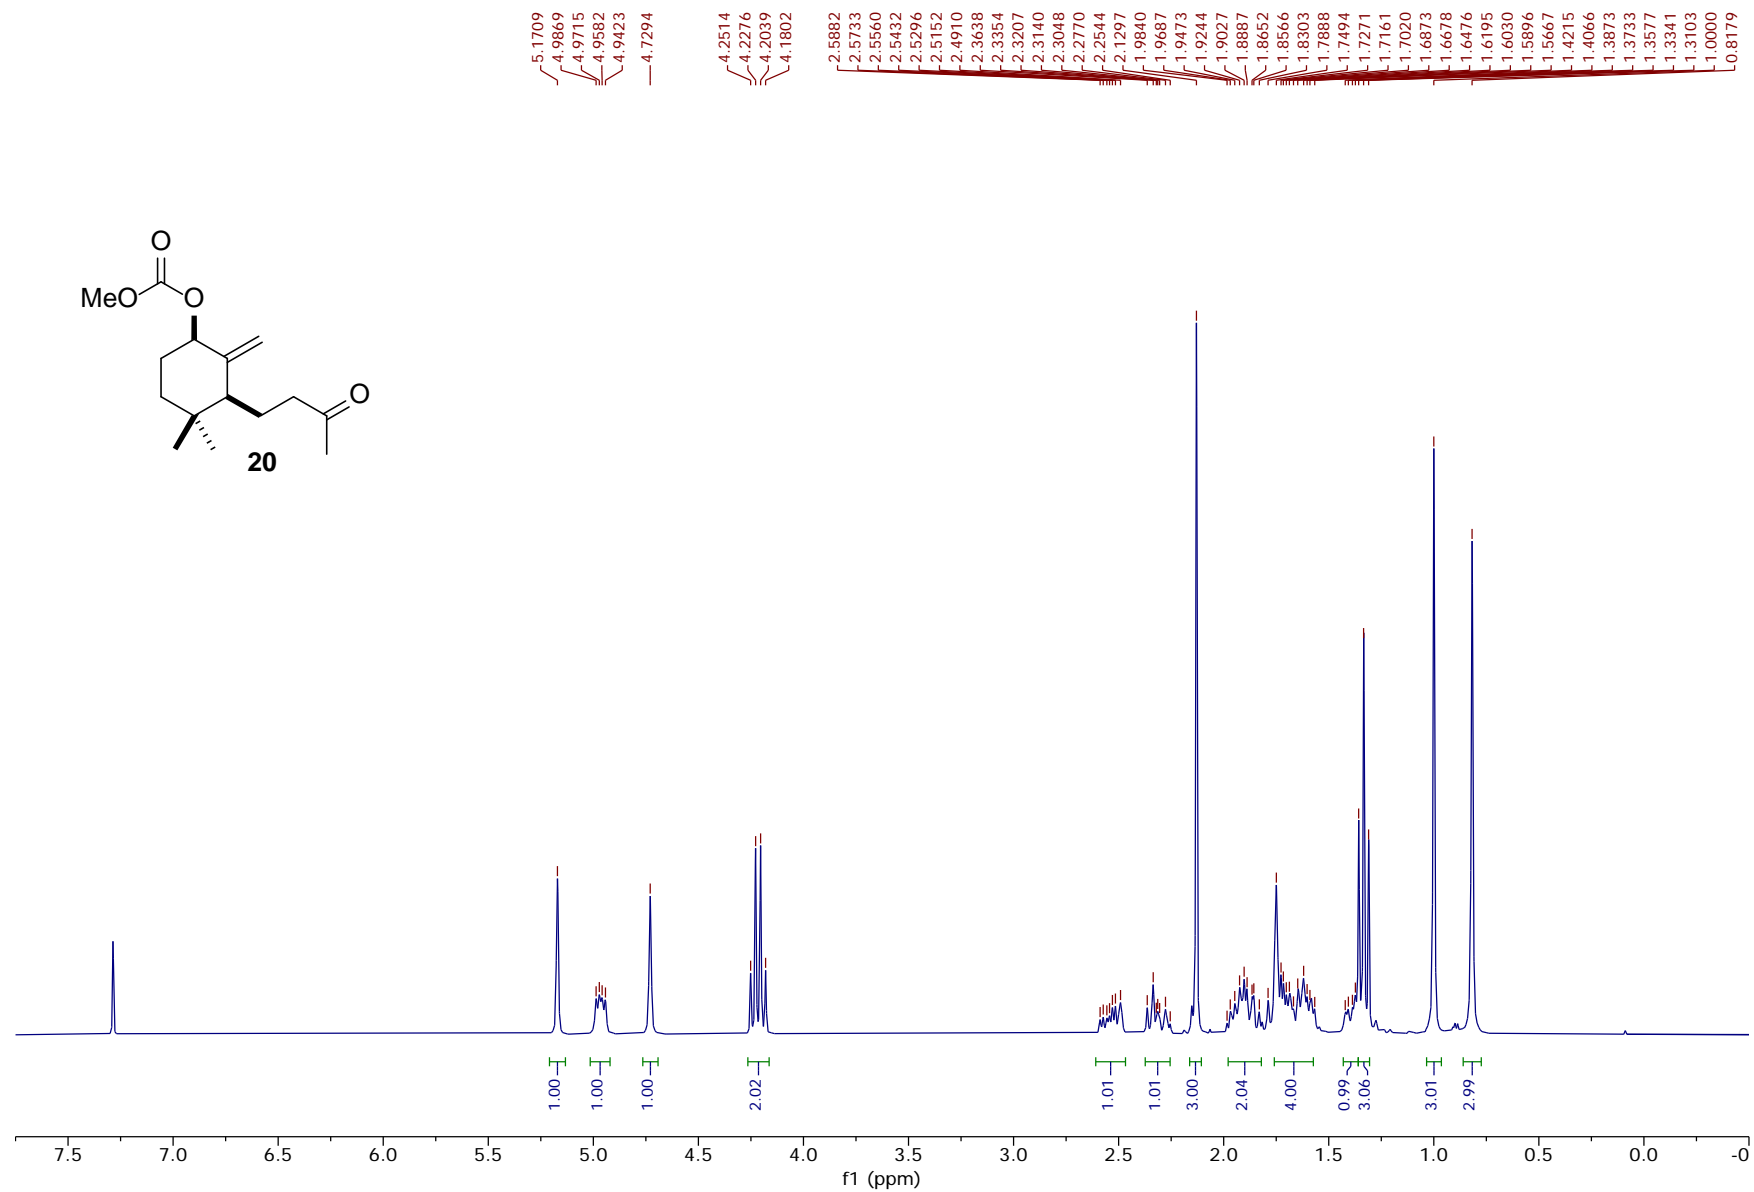

Figure S18

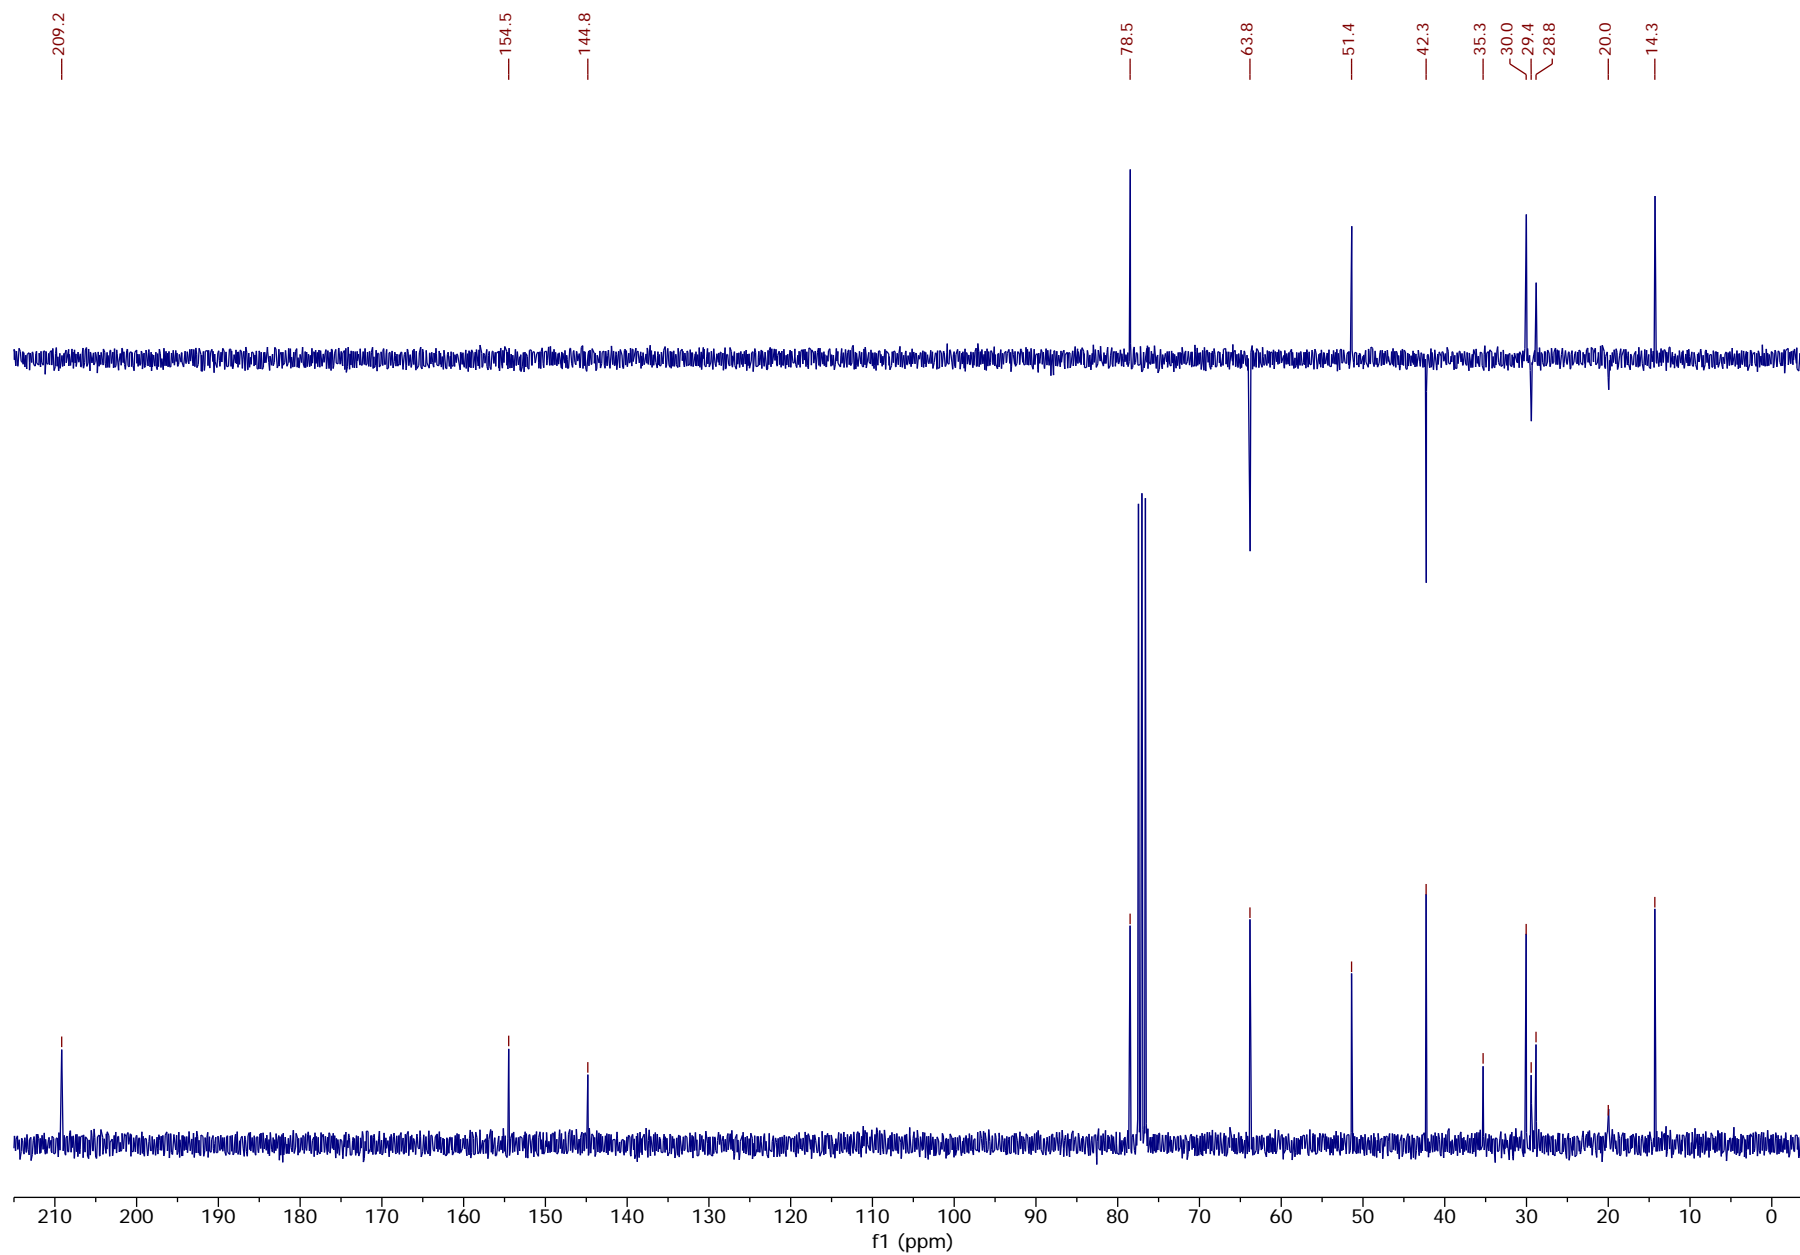

Figure S19

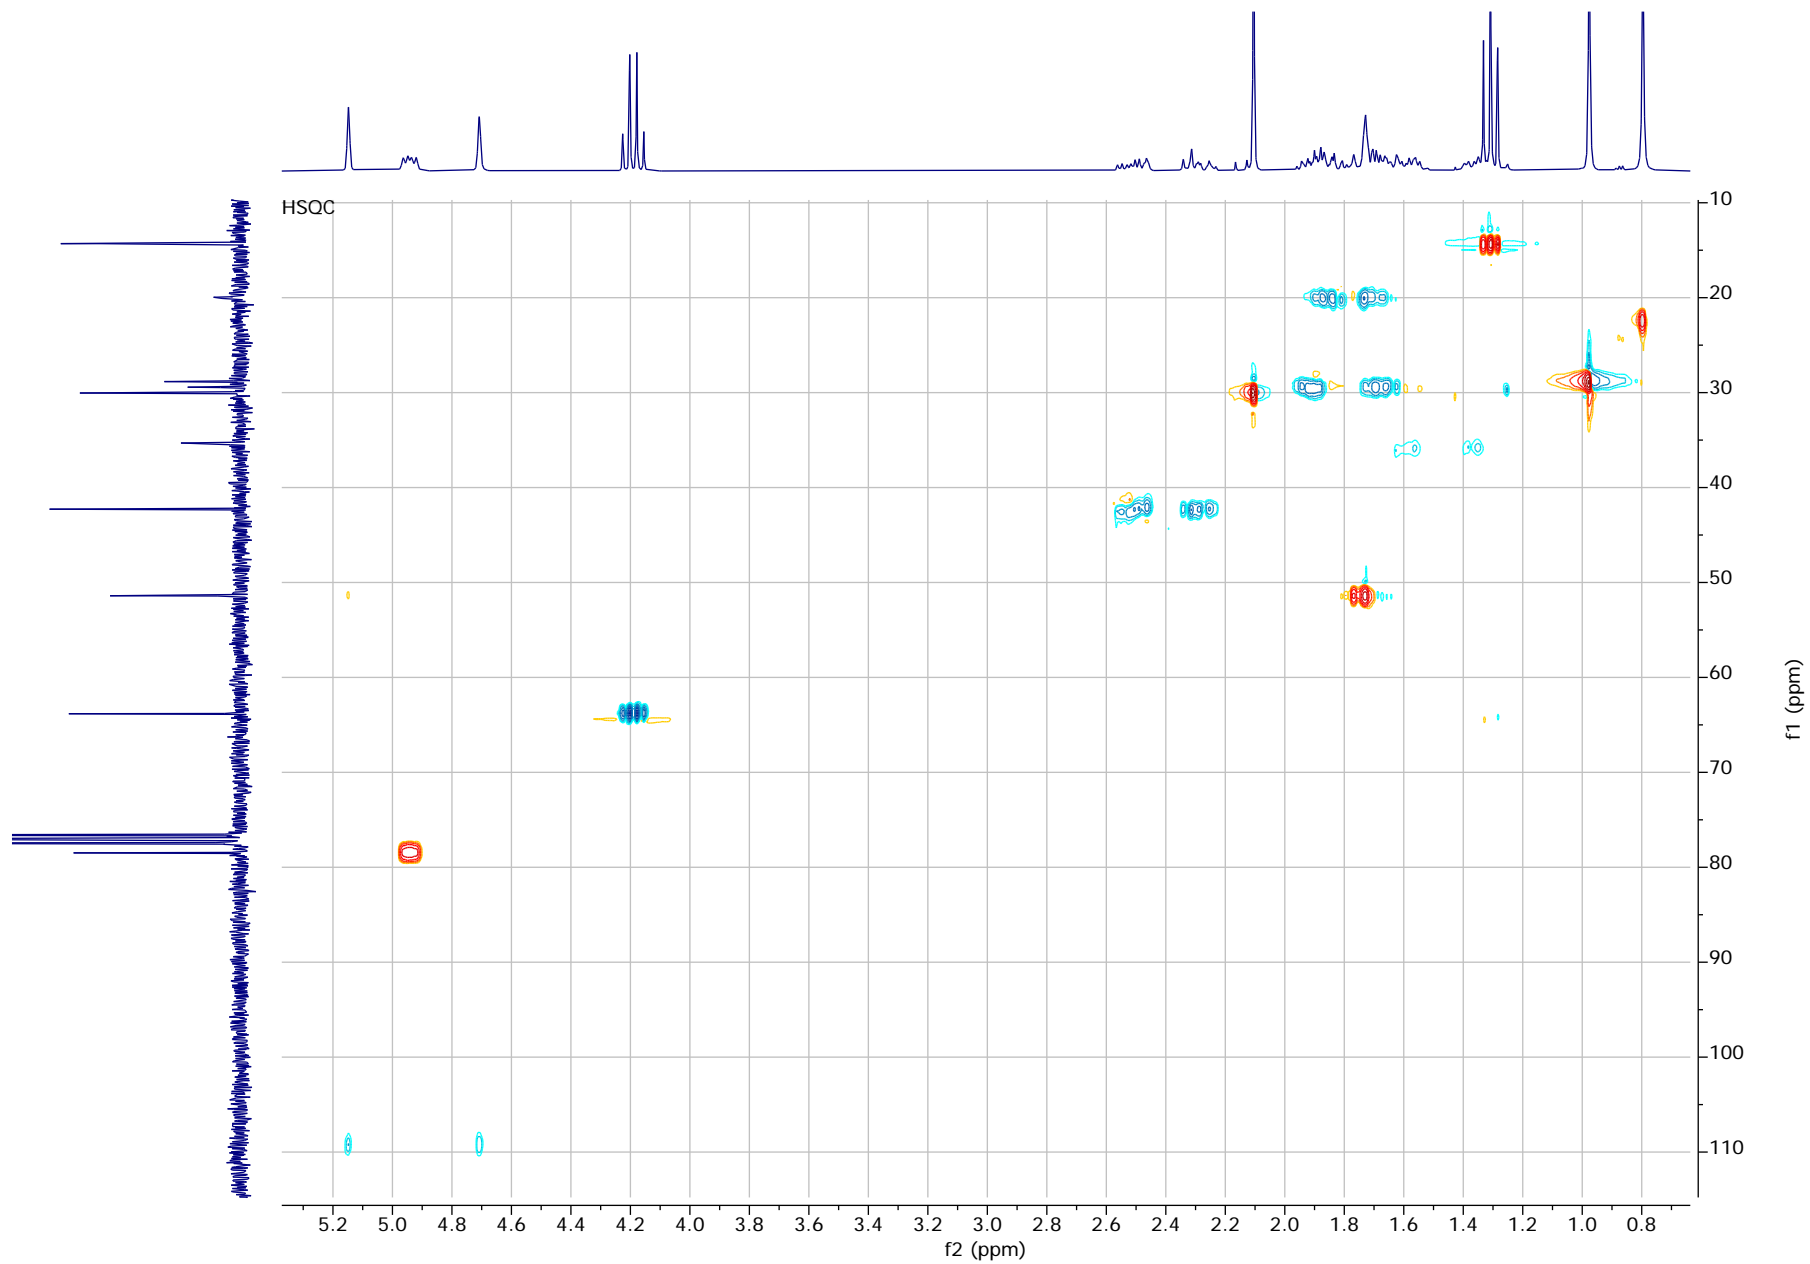

Figure S20

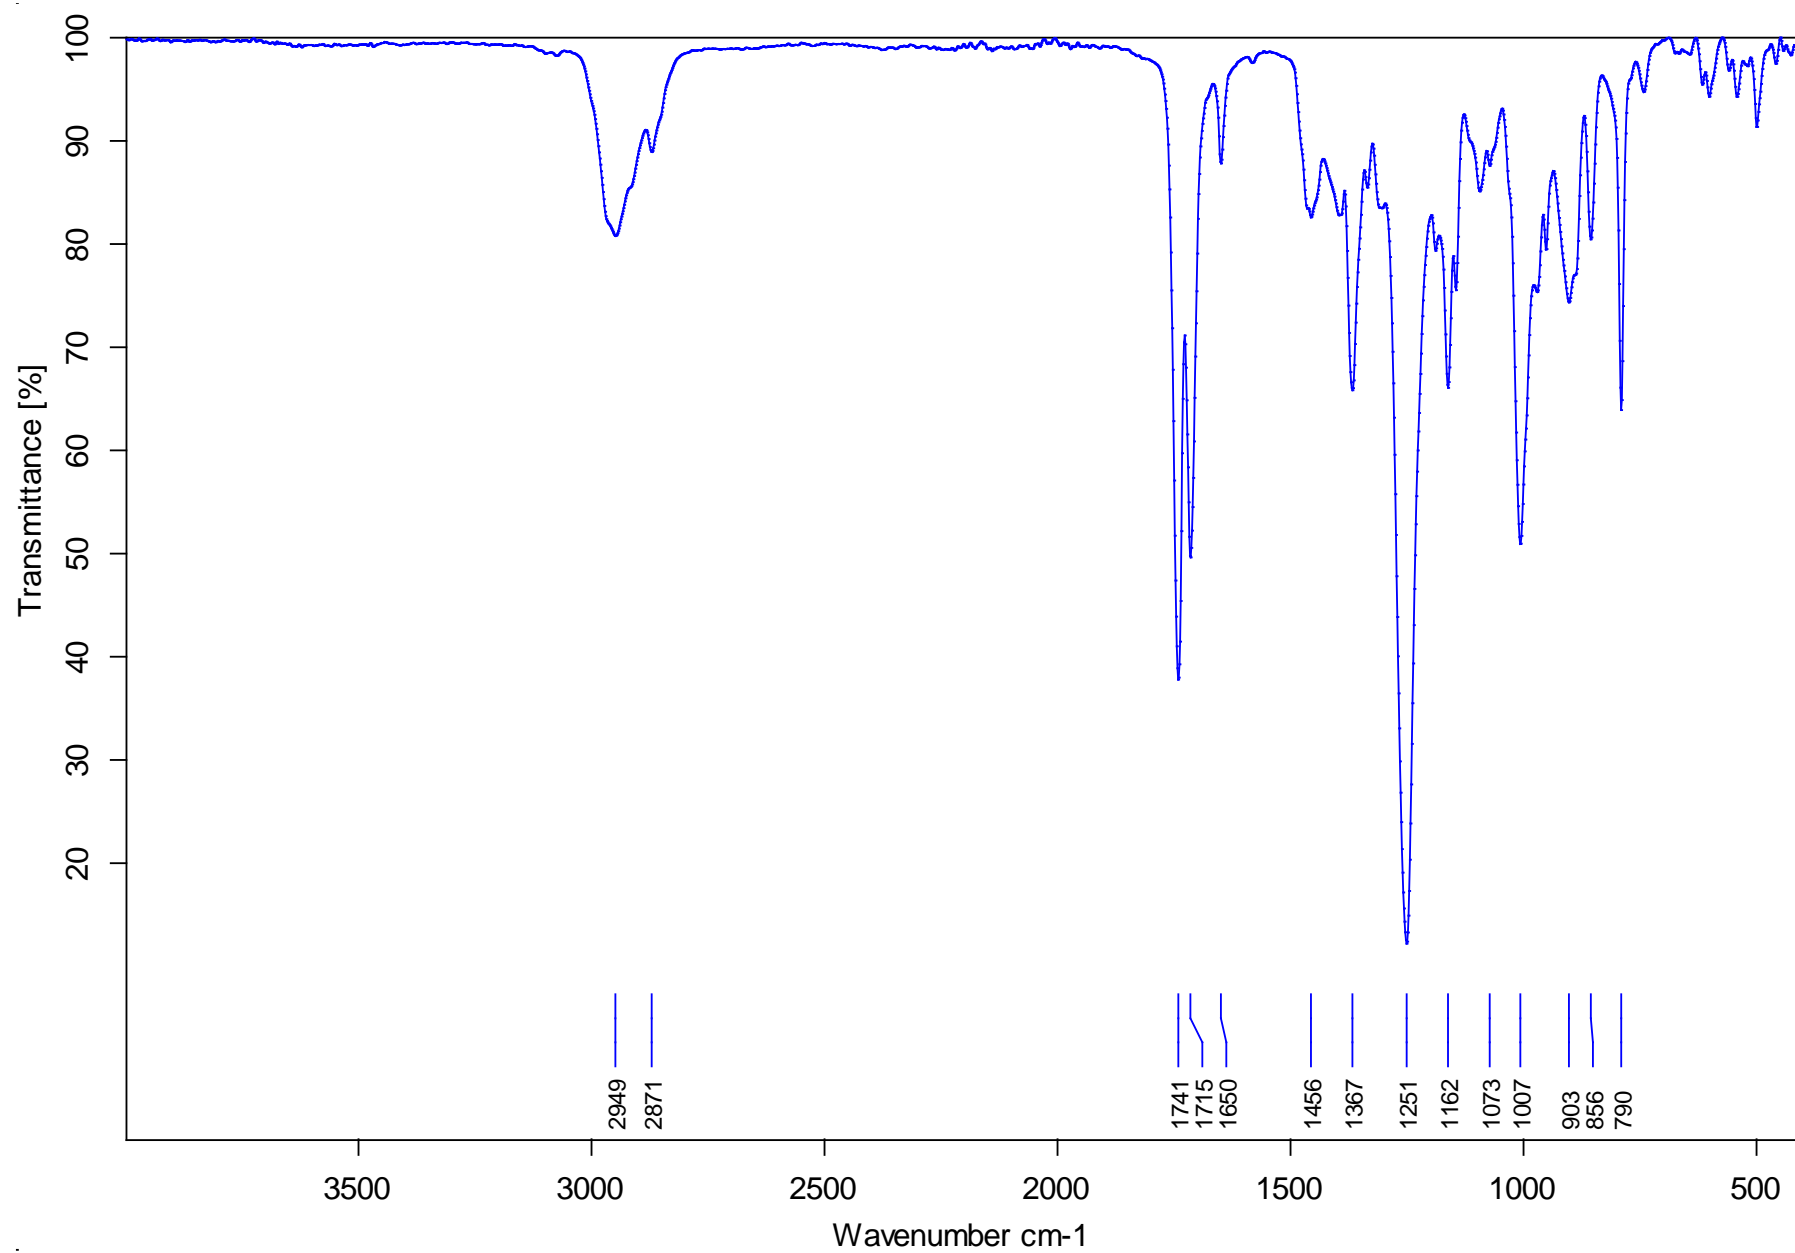

Figure S21

**$^1\text{H}$  NMR, DEPT 135,  $^{13}\text{C}$  NMR, HSQC, HMBC, COSY, NOESY 1D and IR of 6**

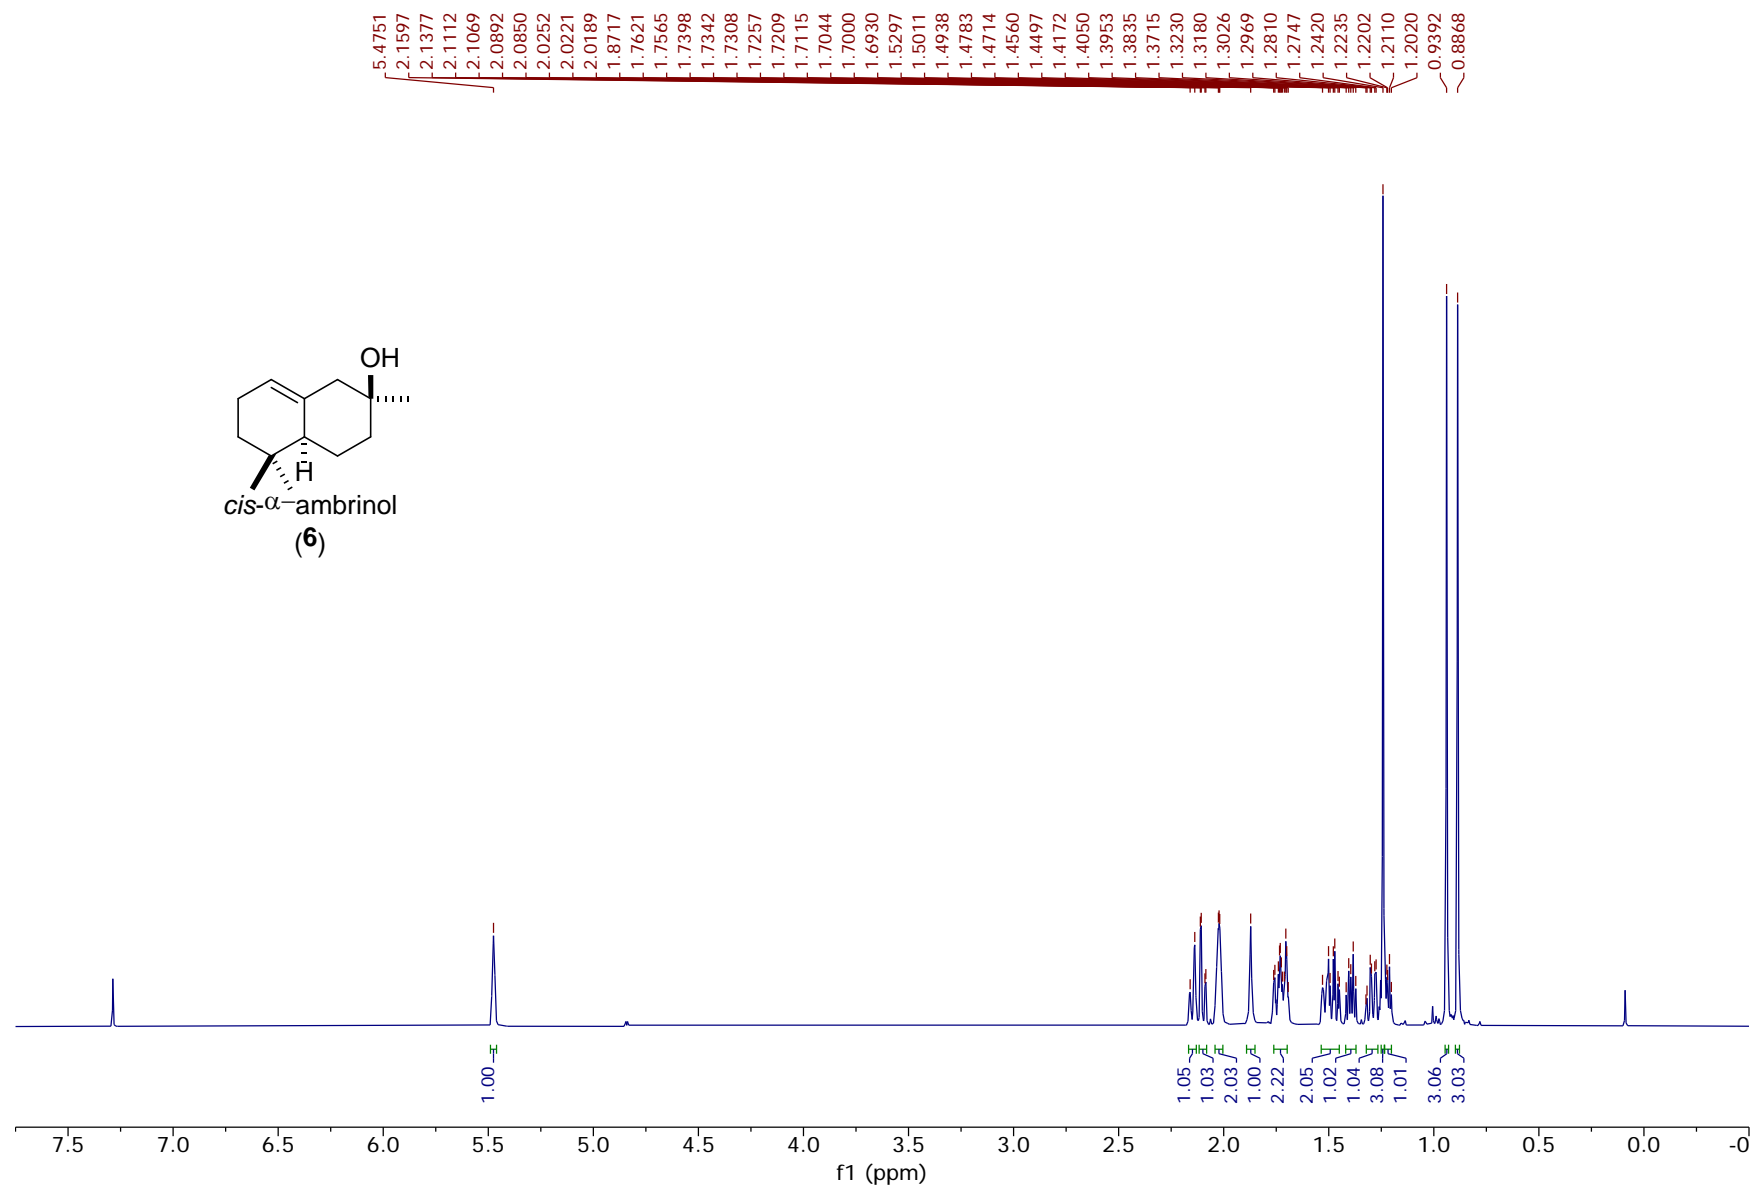

Figure S22

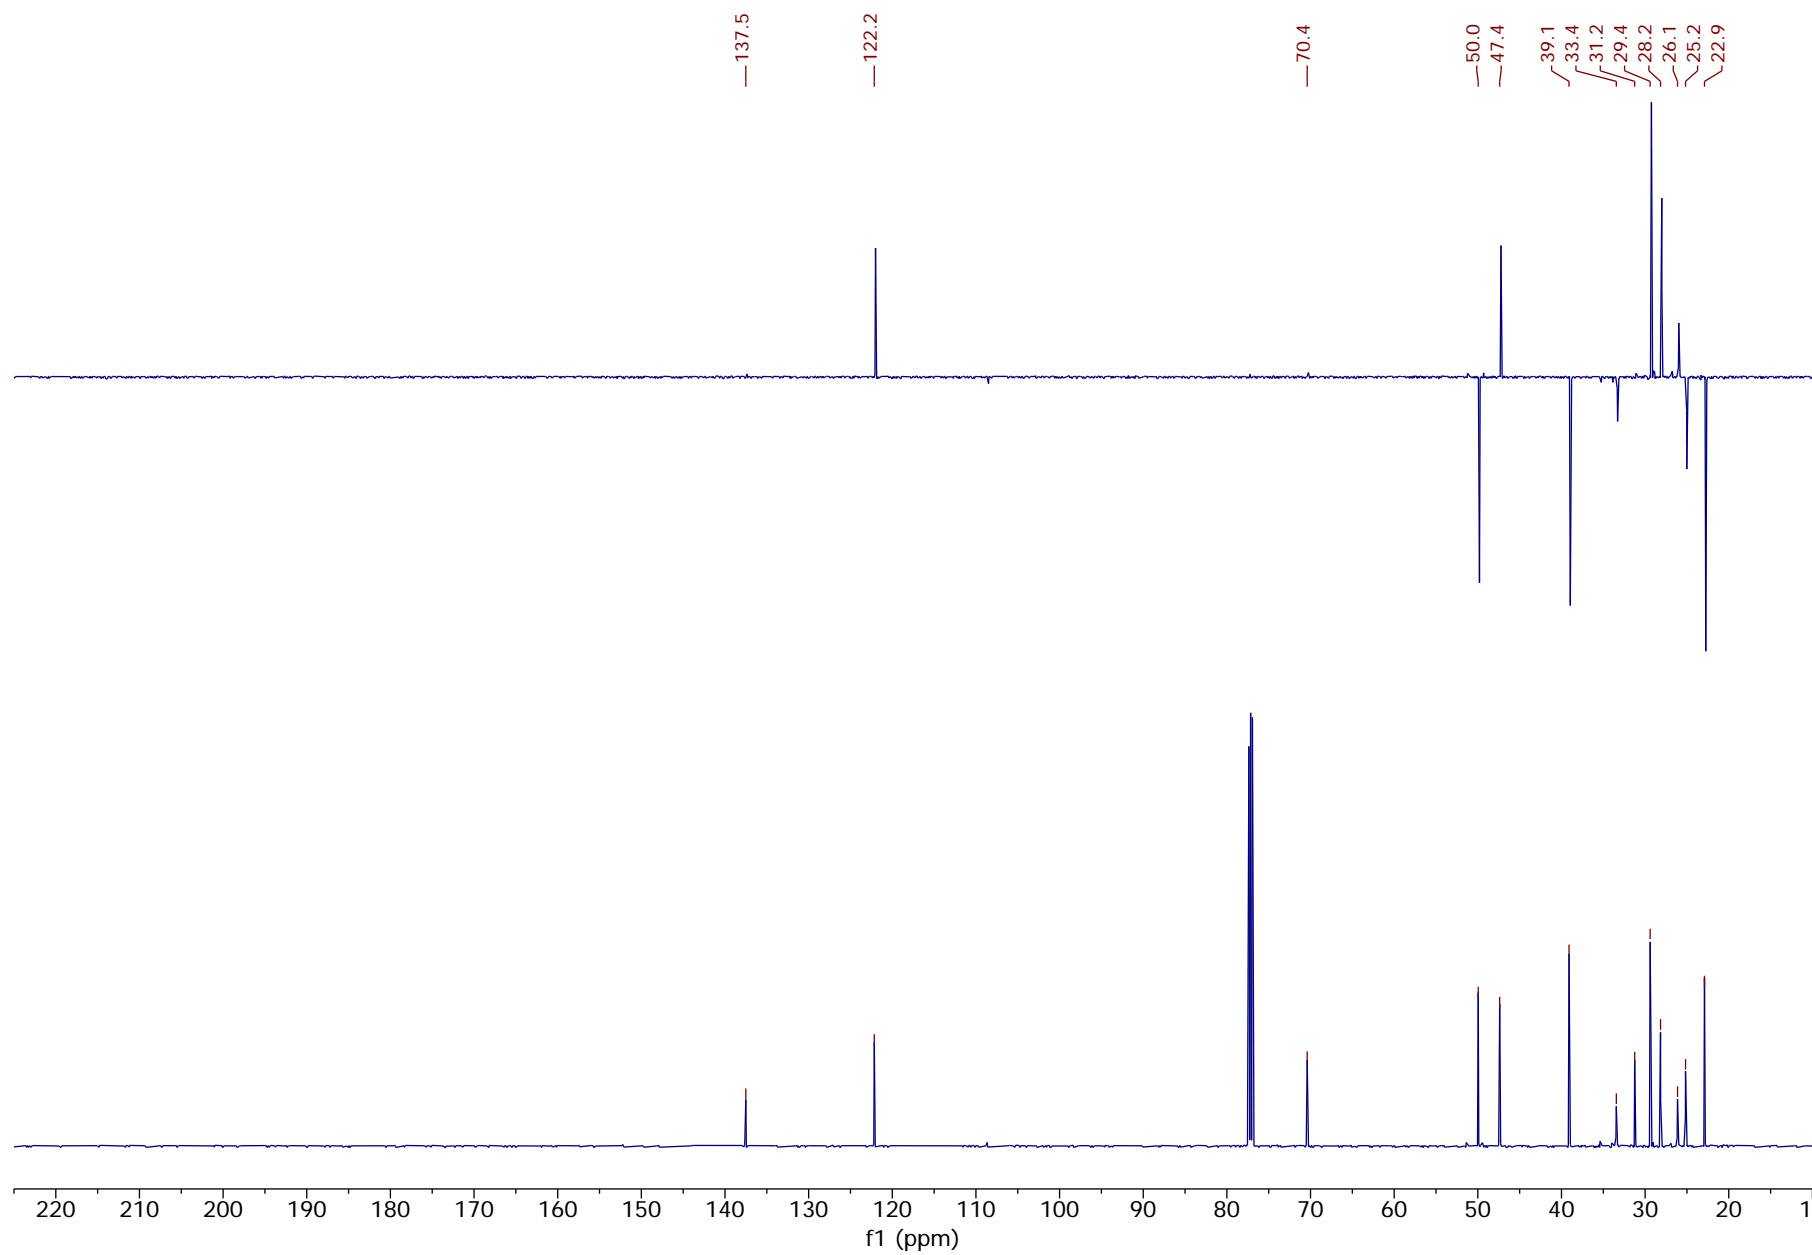

Figure S23



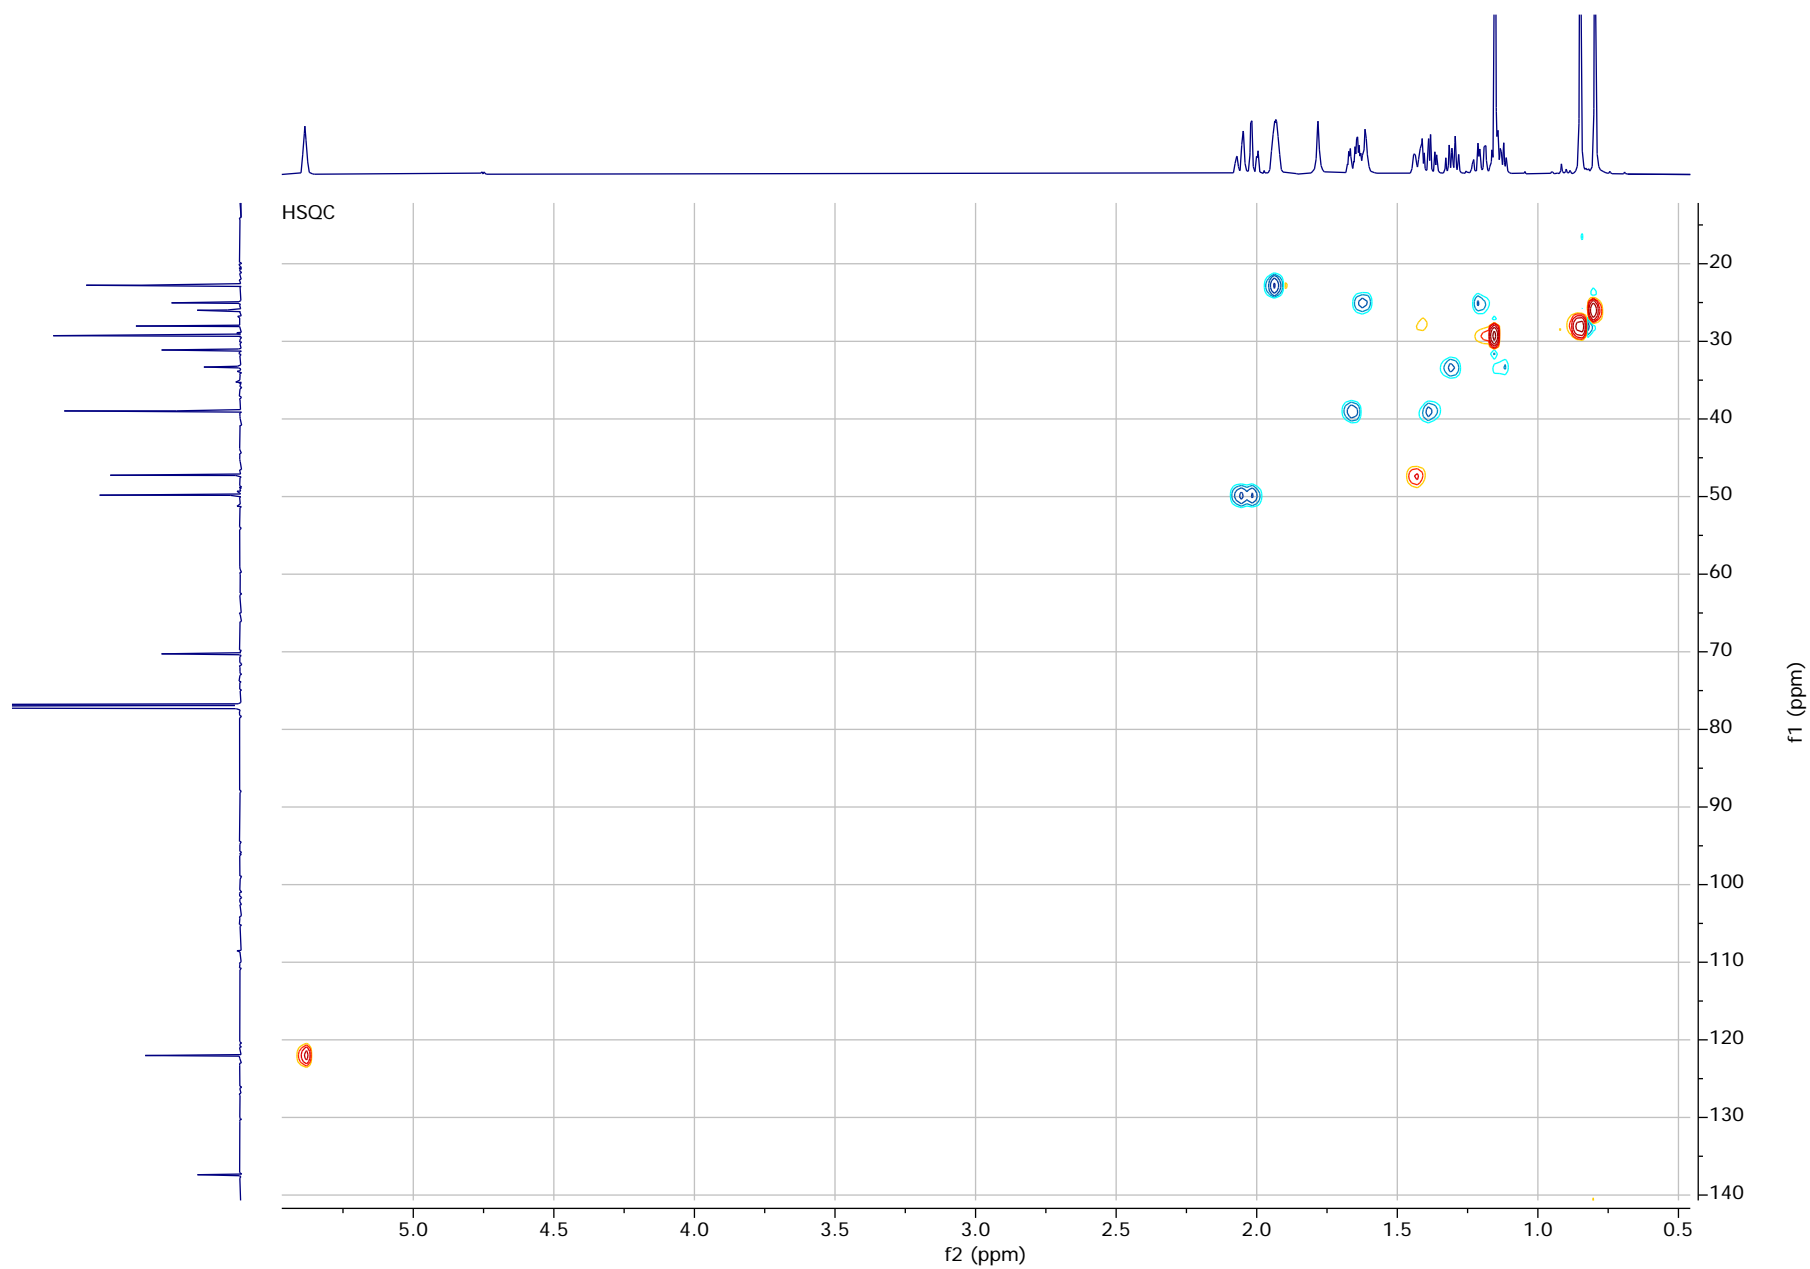

Figure S24

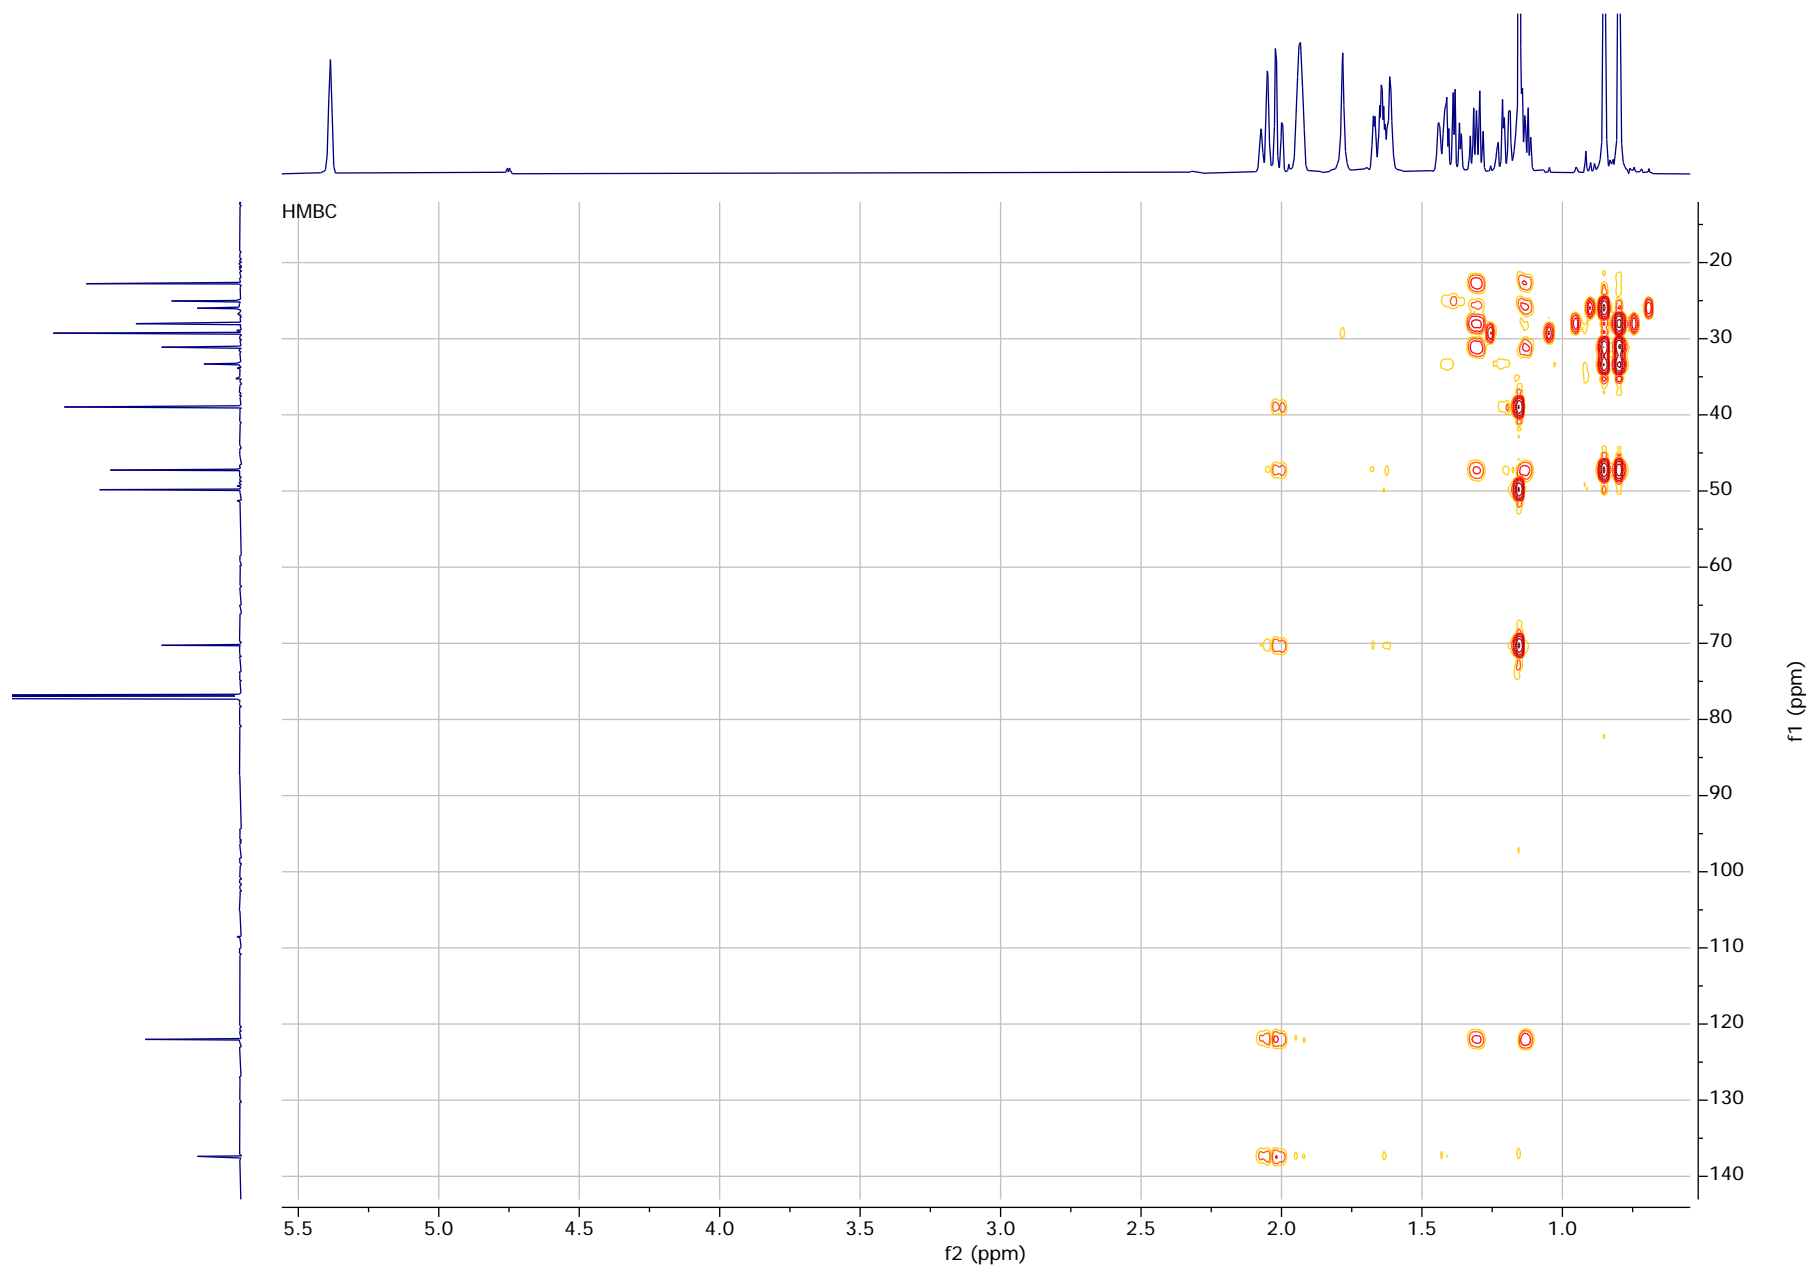

Figure S25



1D Selective Gradient NOESY  
freq: 0.938ppm

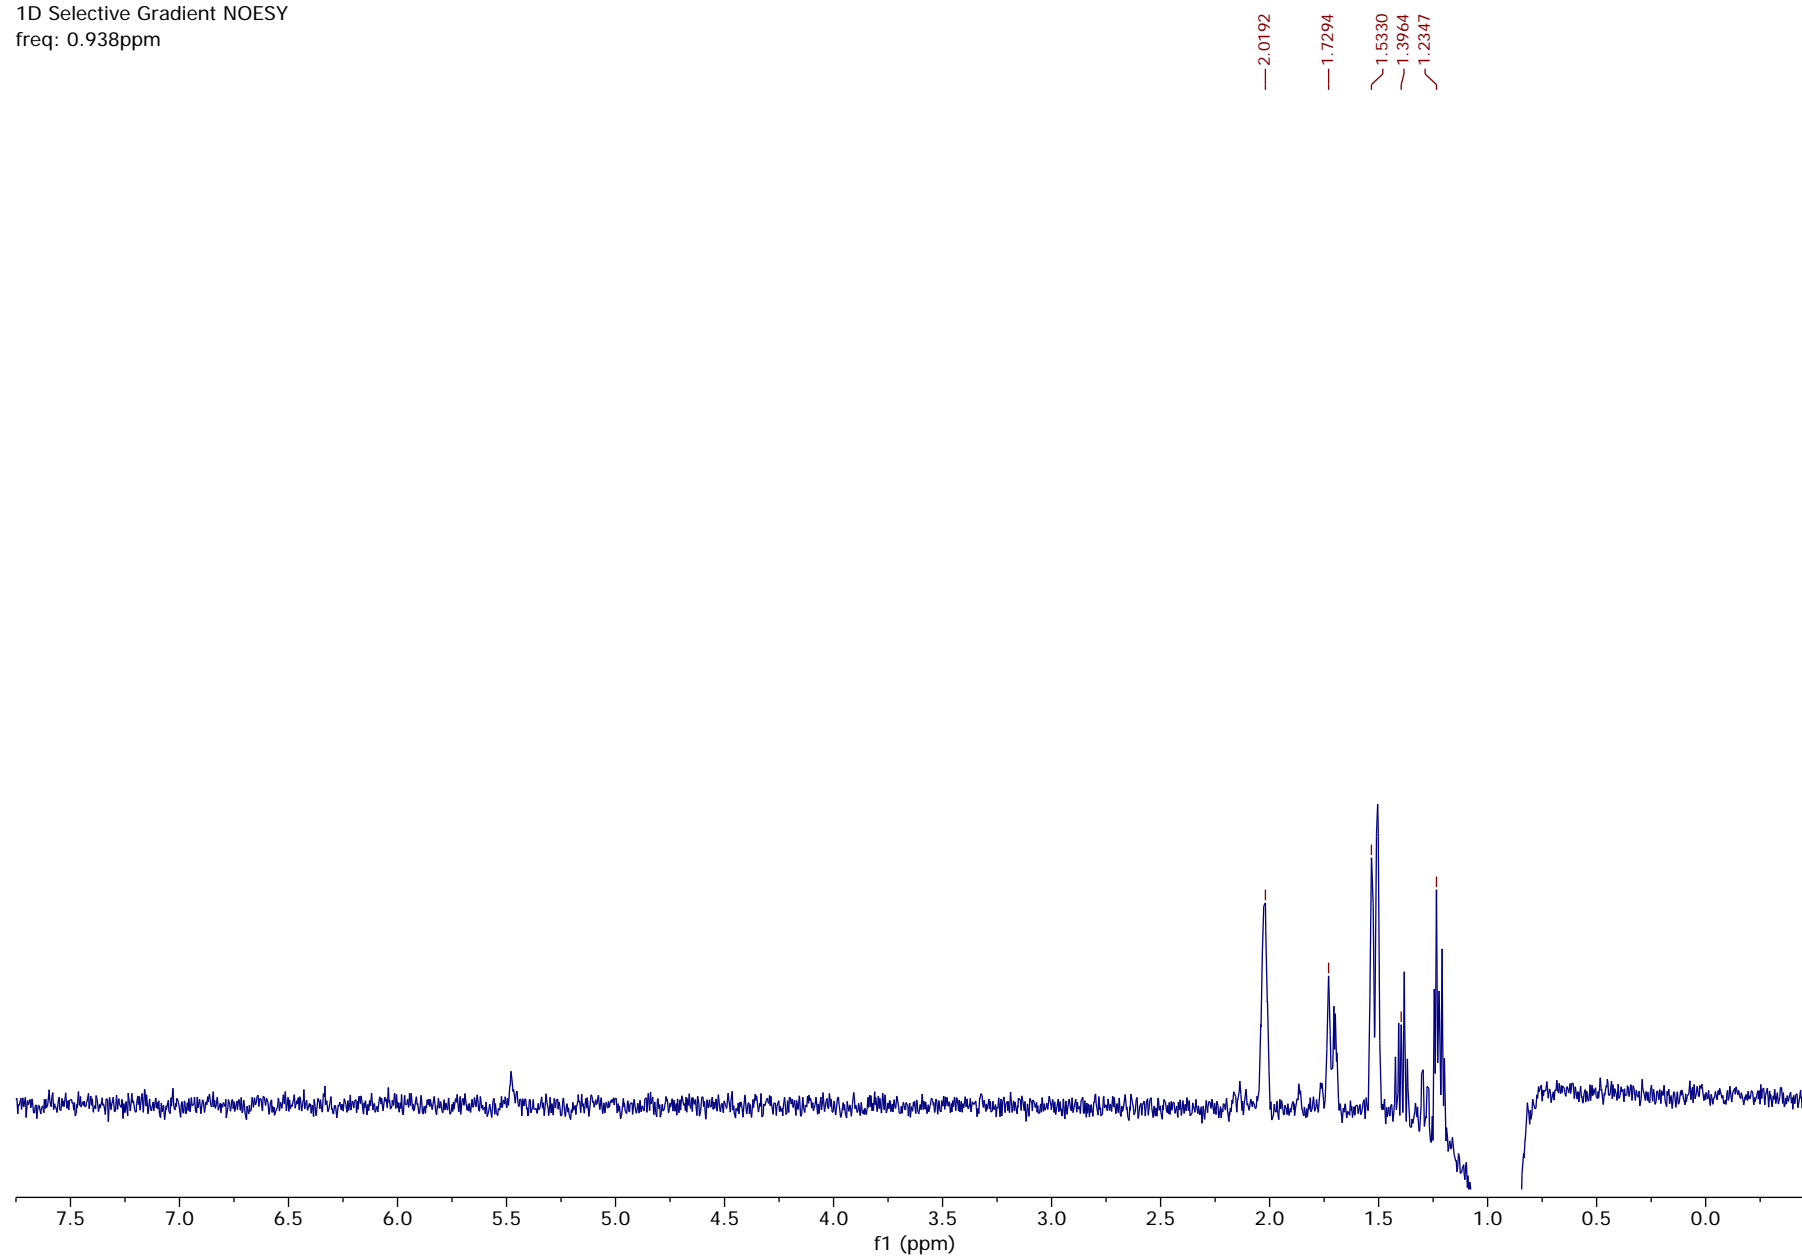

Figure S27

1D Selective Gradient NOESY  
freq: 1.244ppm

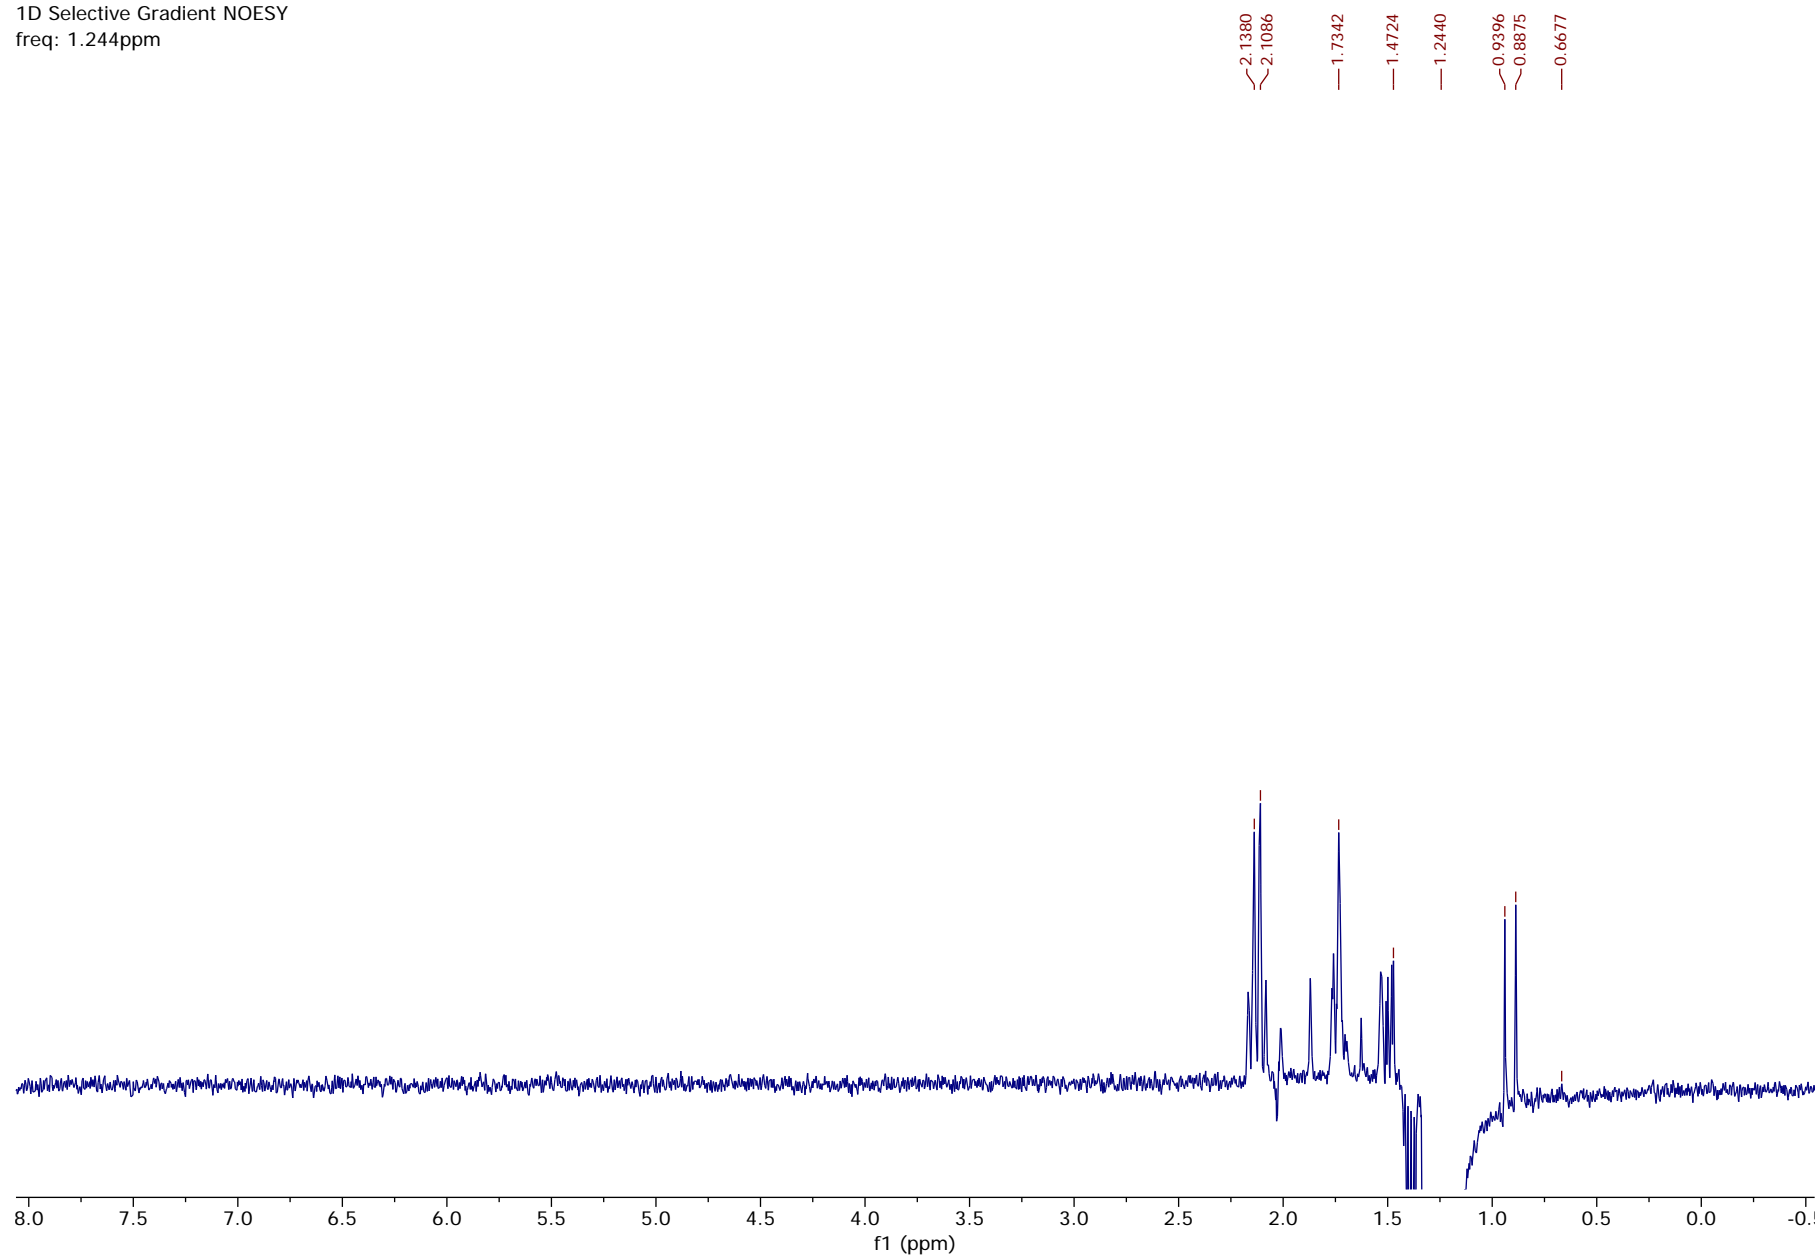

Figure S28

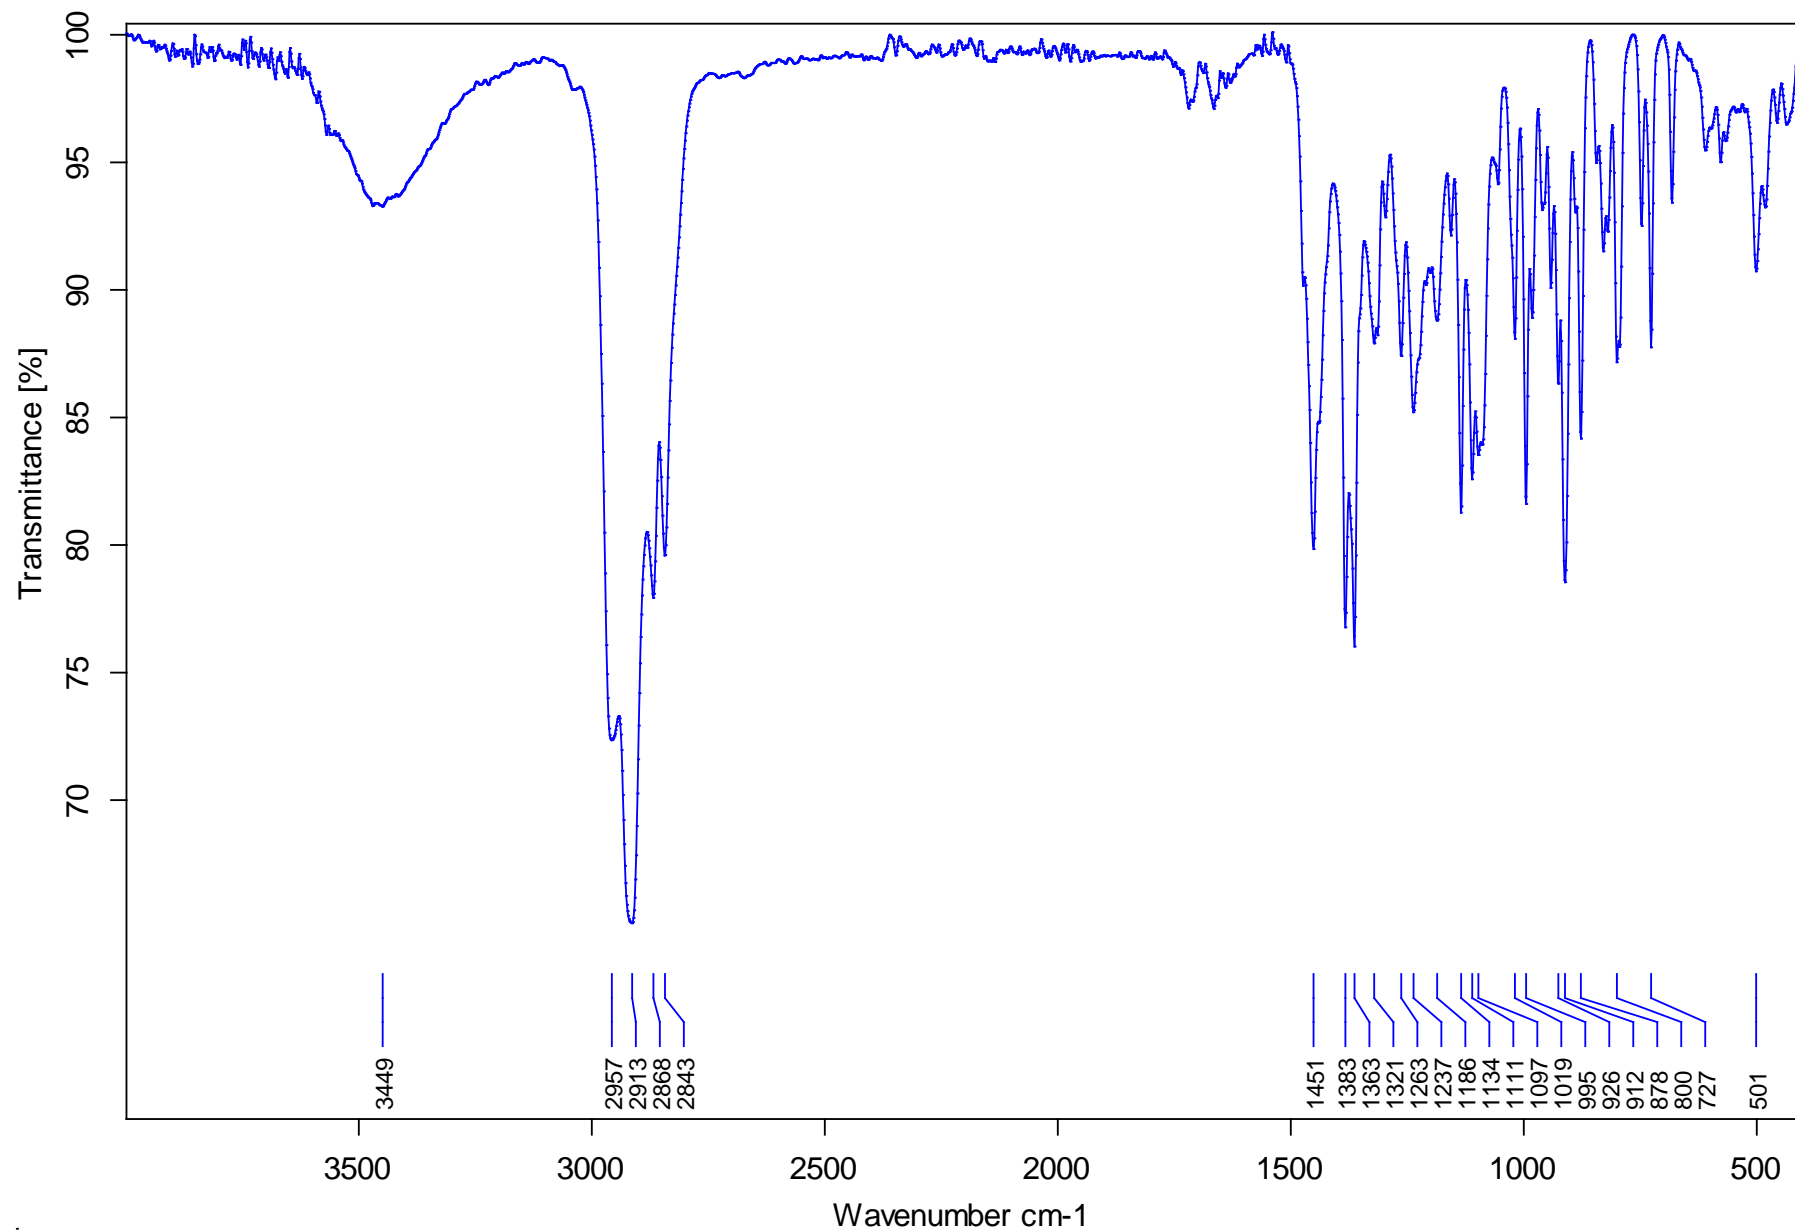

Figure S29

**$^1\text{H}$  NMR, DEPT 135,  $^{13}\text{C}$  NMR, HSQC, HMBC, COSY, NOESY 1D and IR of 24**

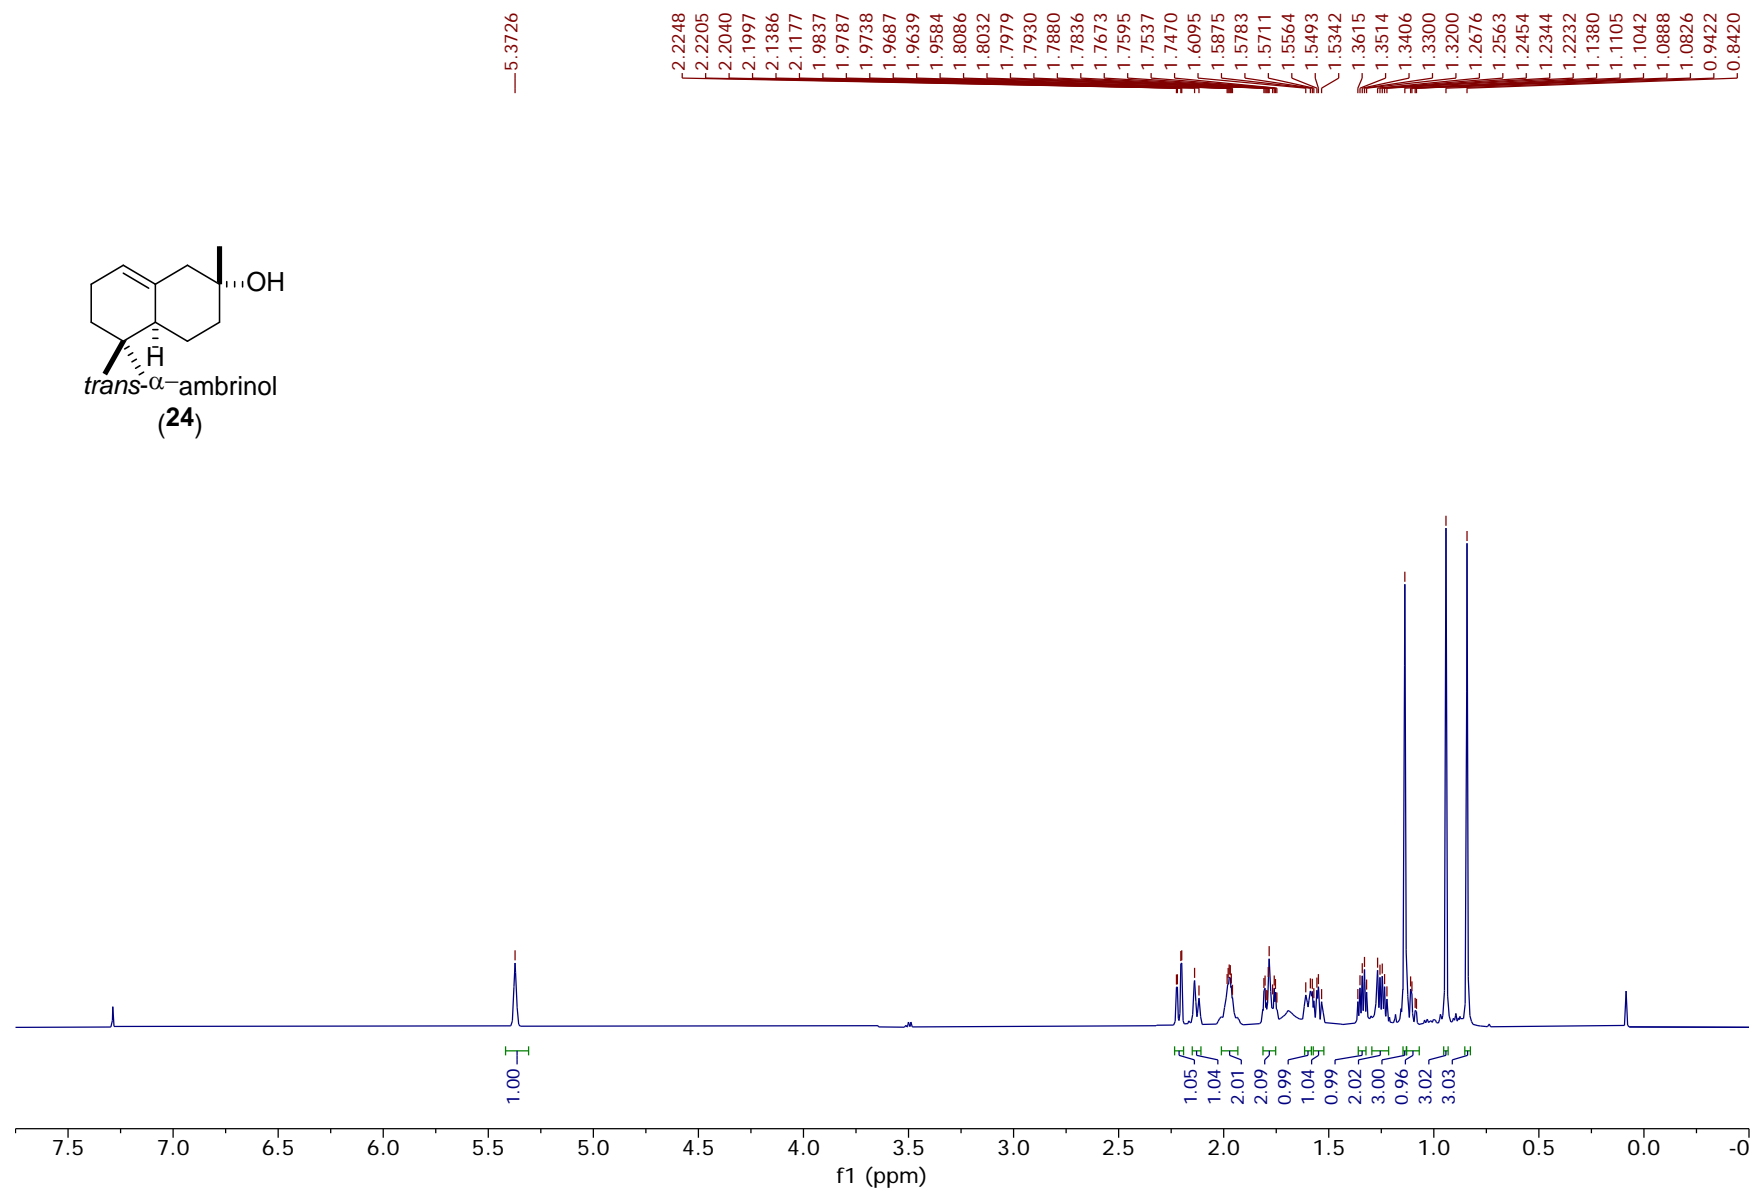

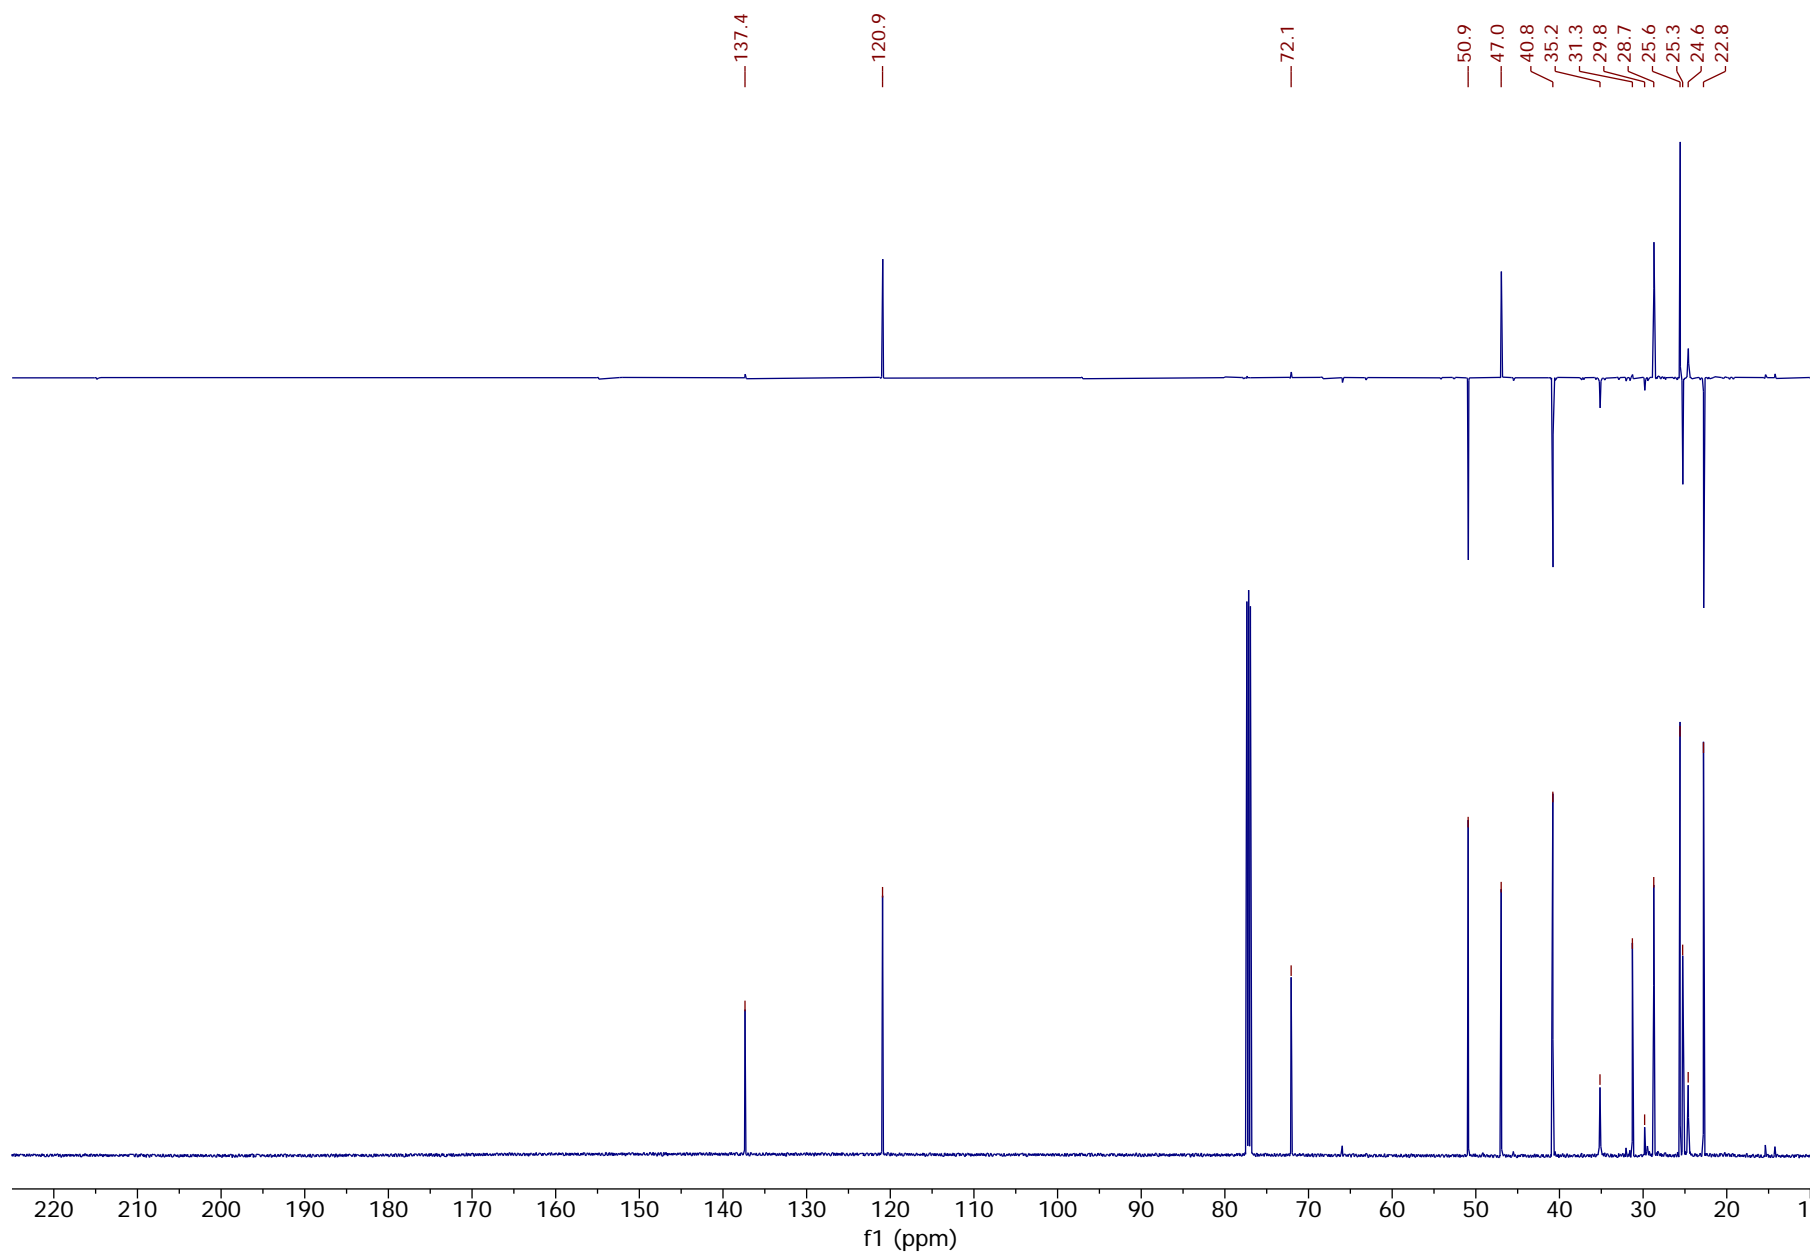

Figure S31



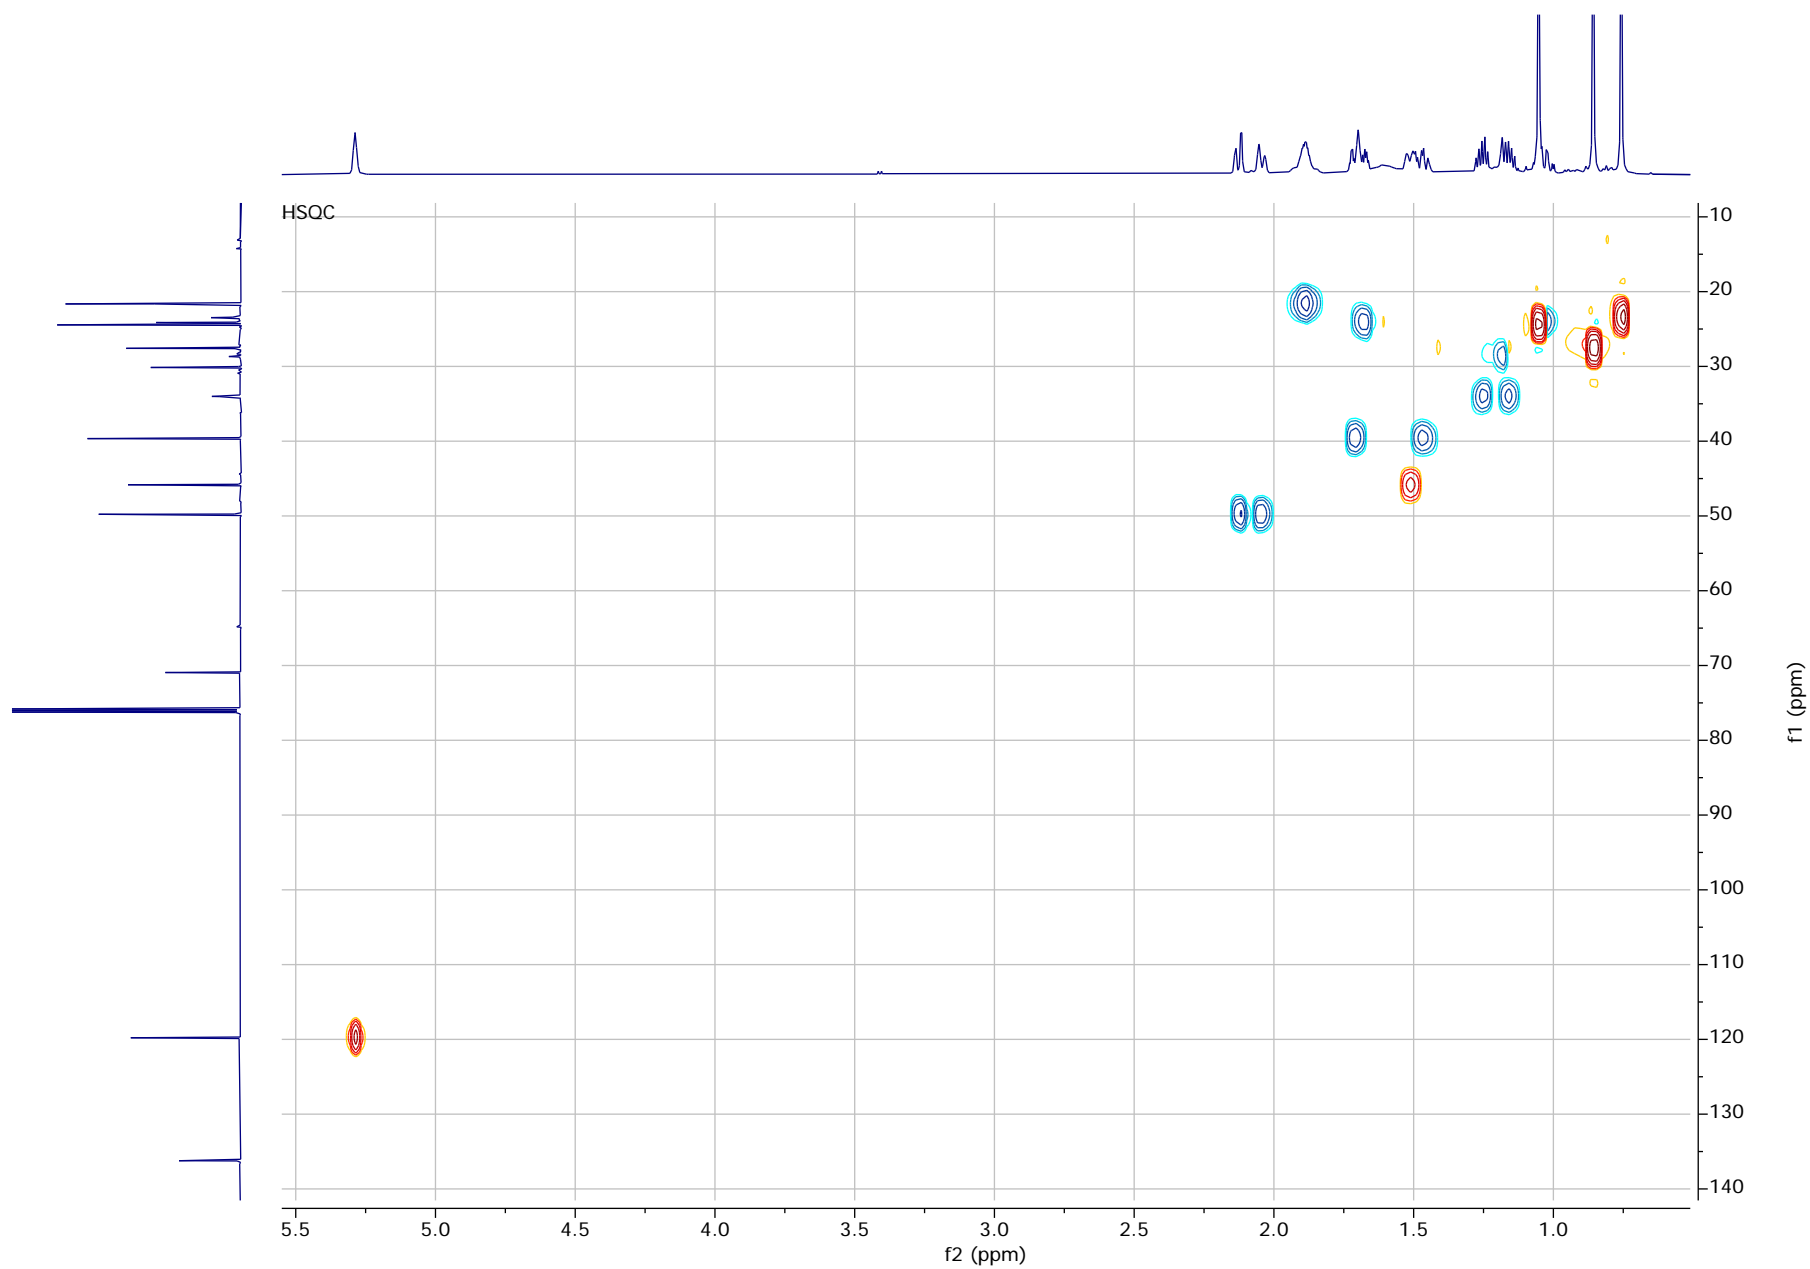

Figure S32

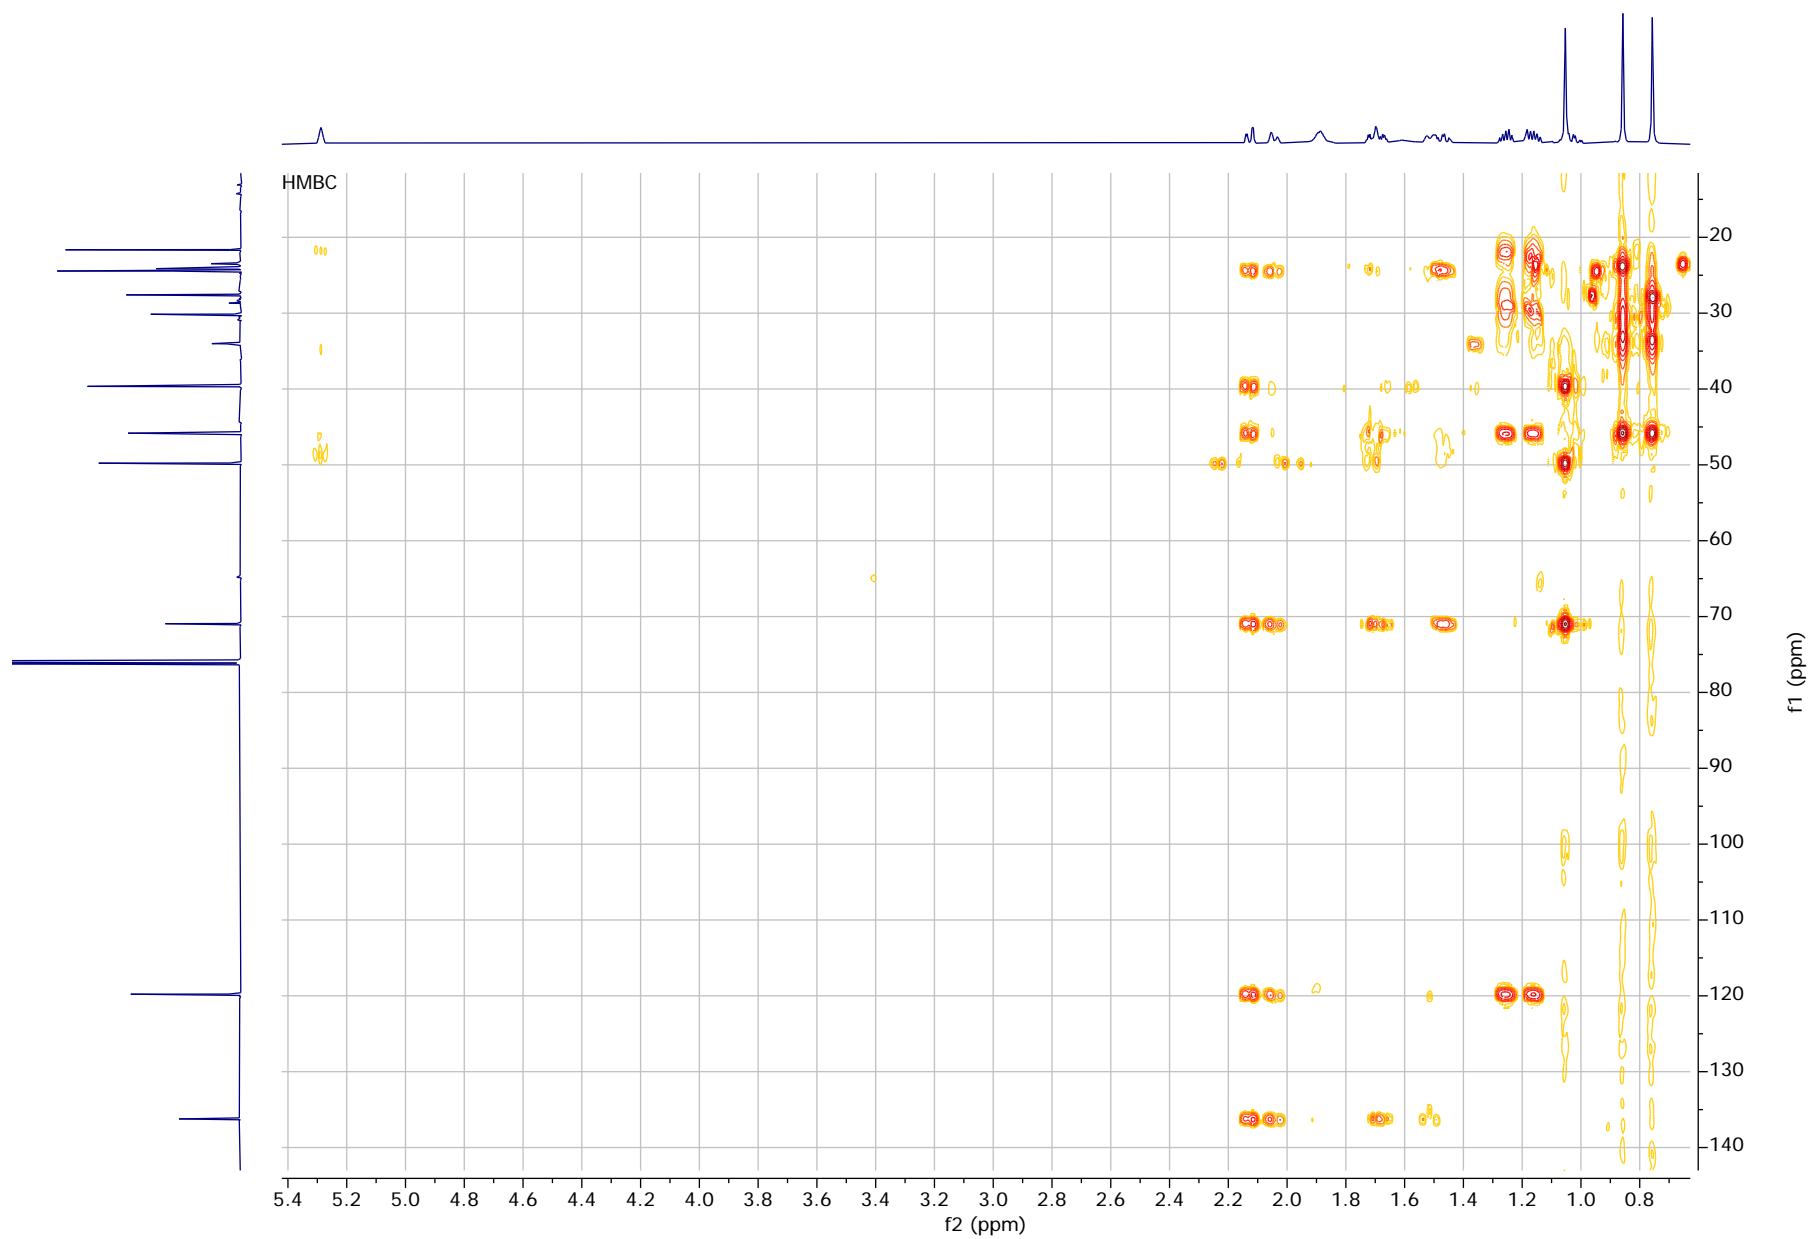

Figure S33

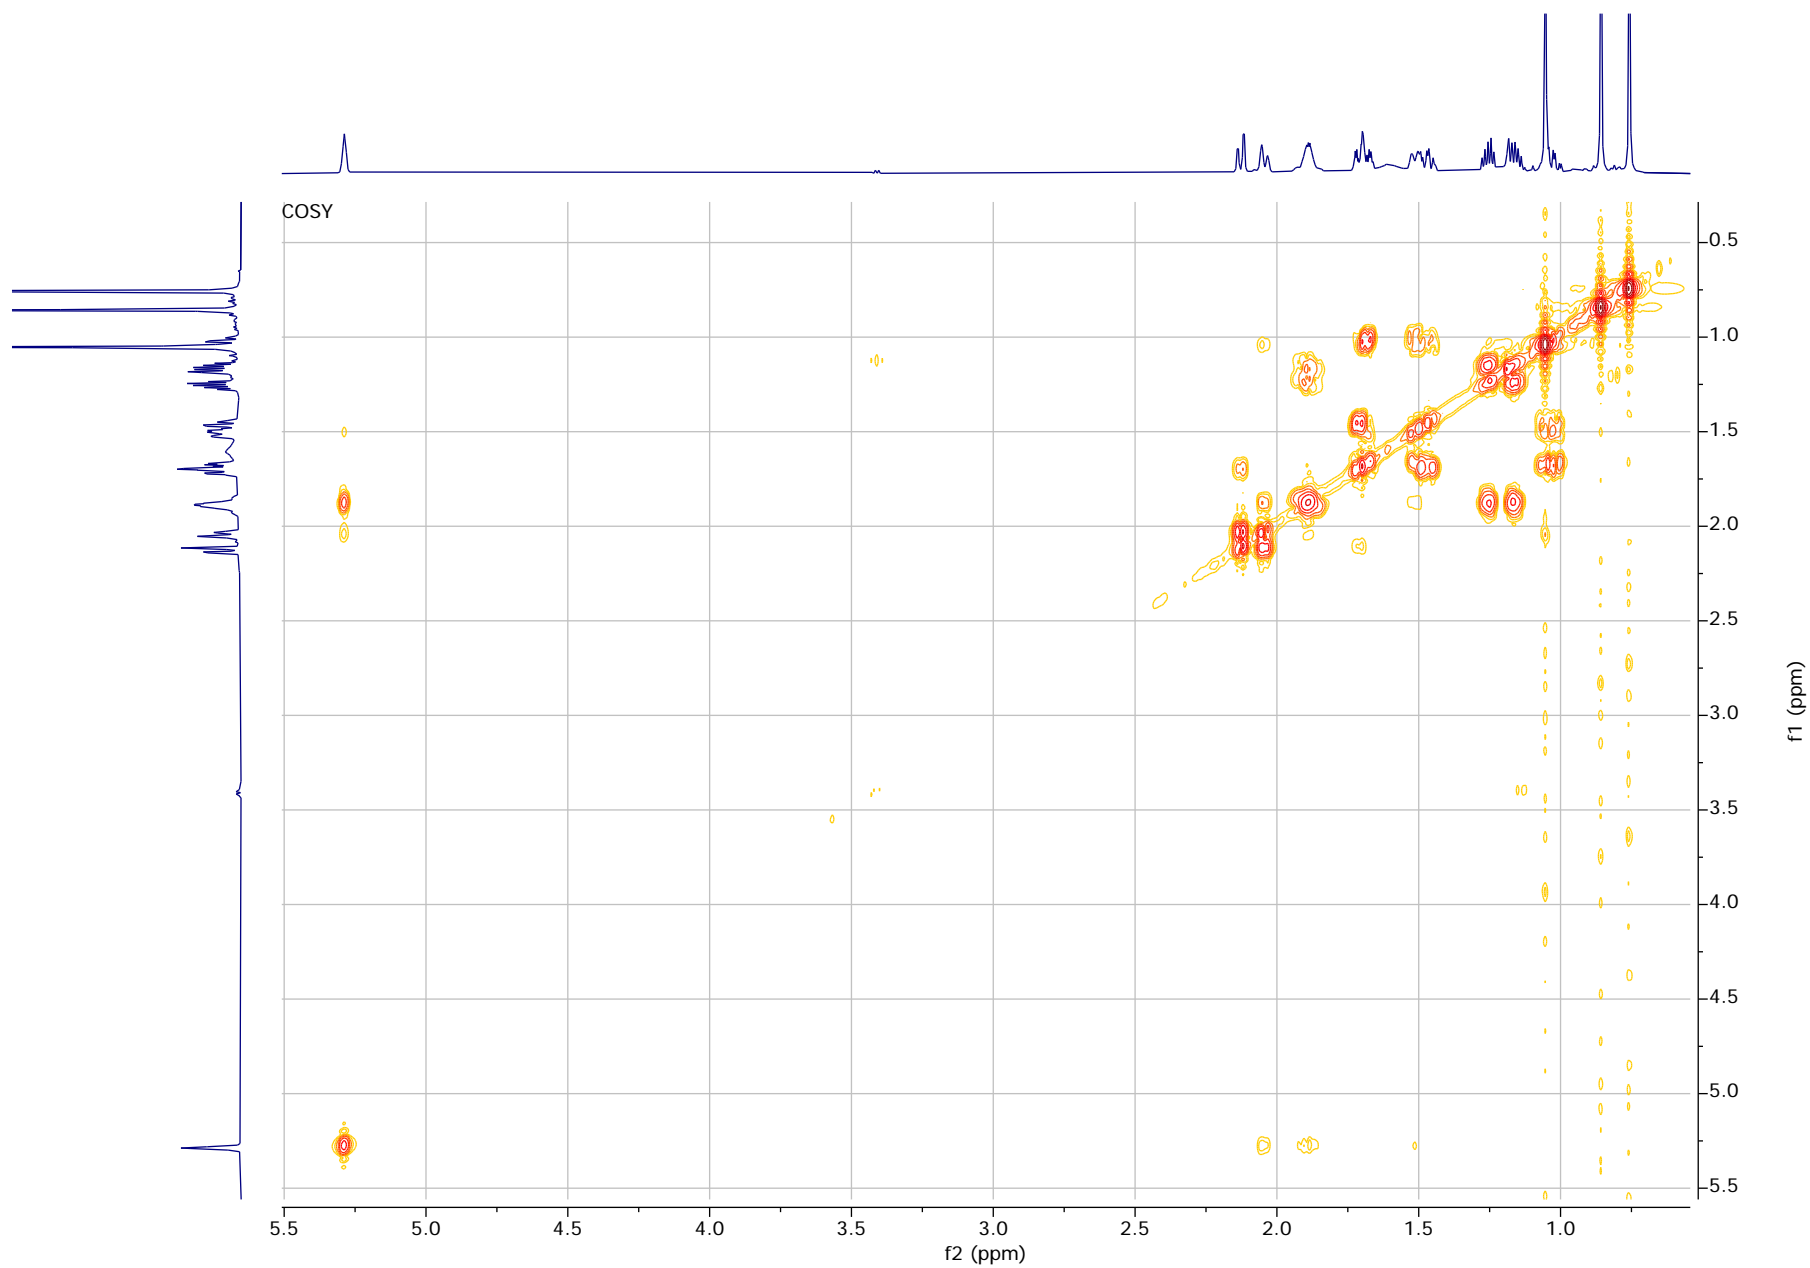

Figure S34

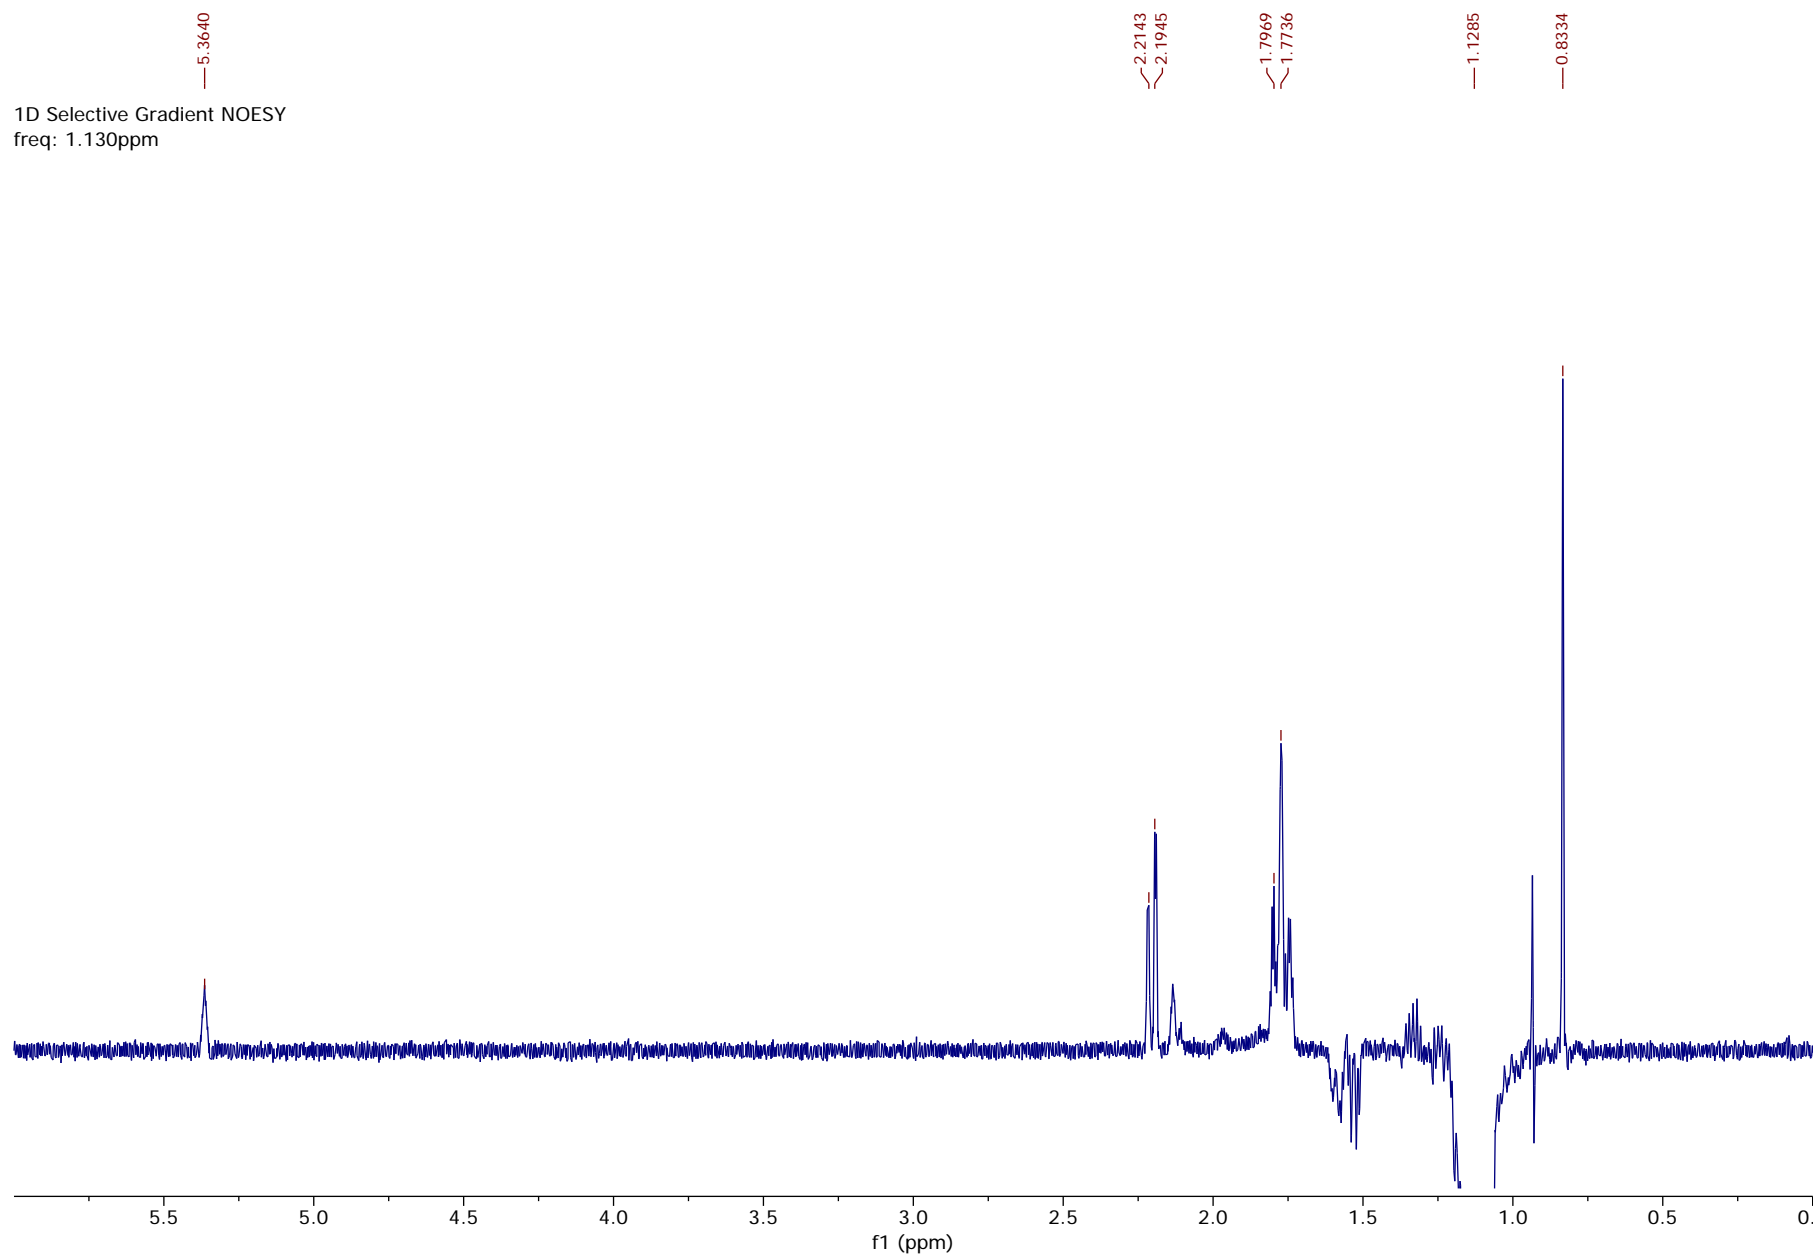

Figure S35

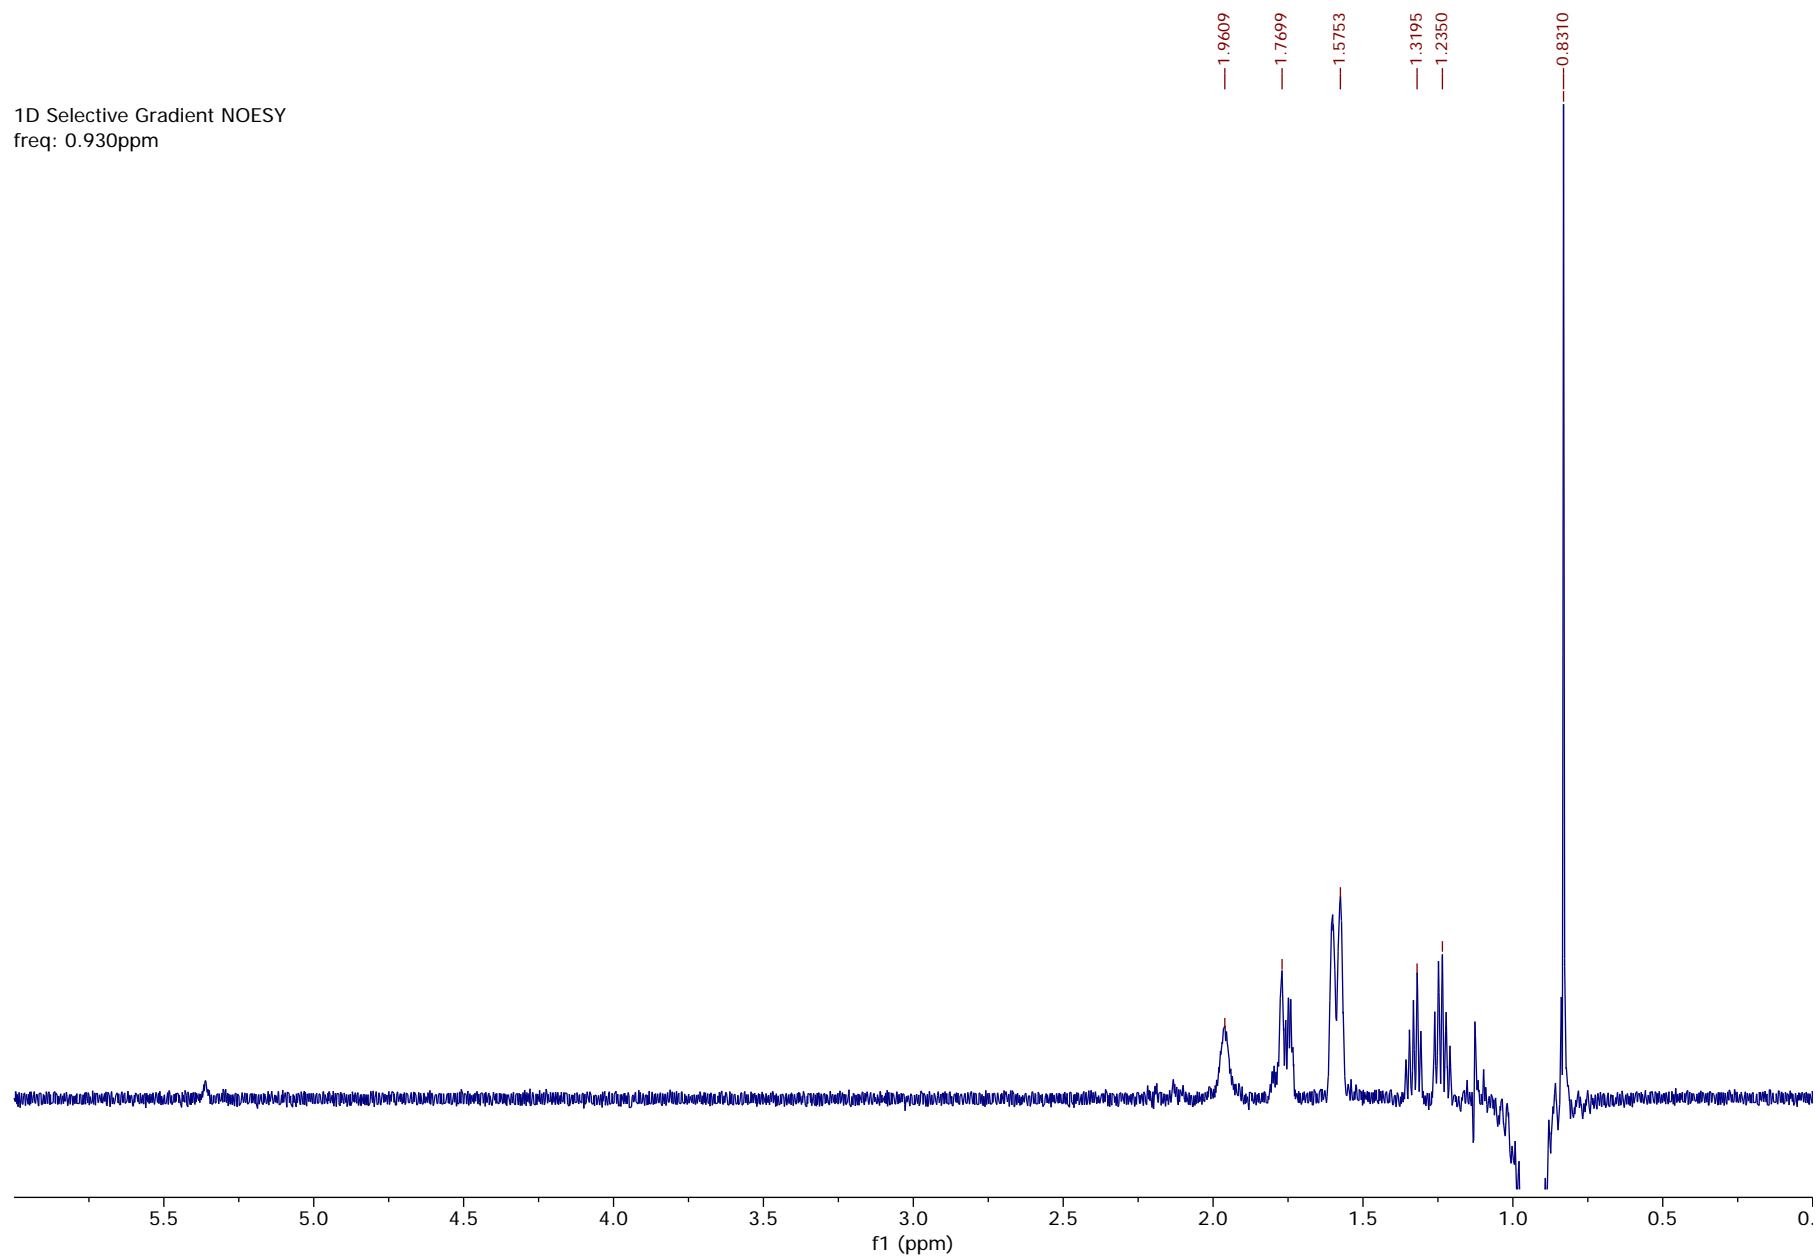

Figure S36

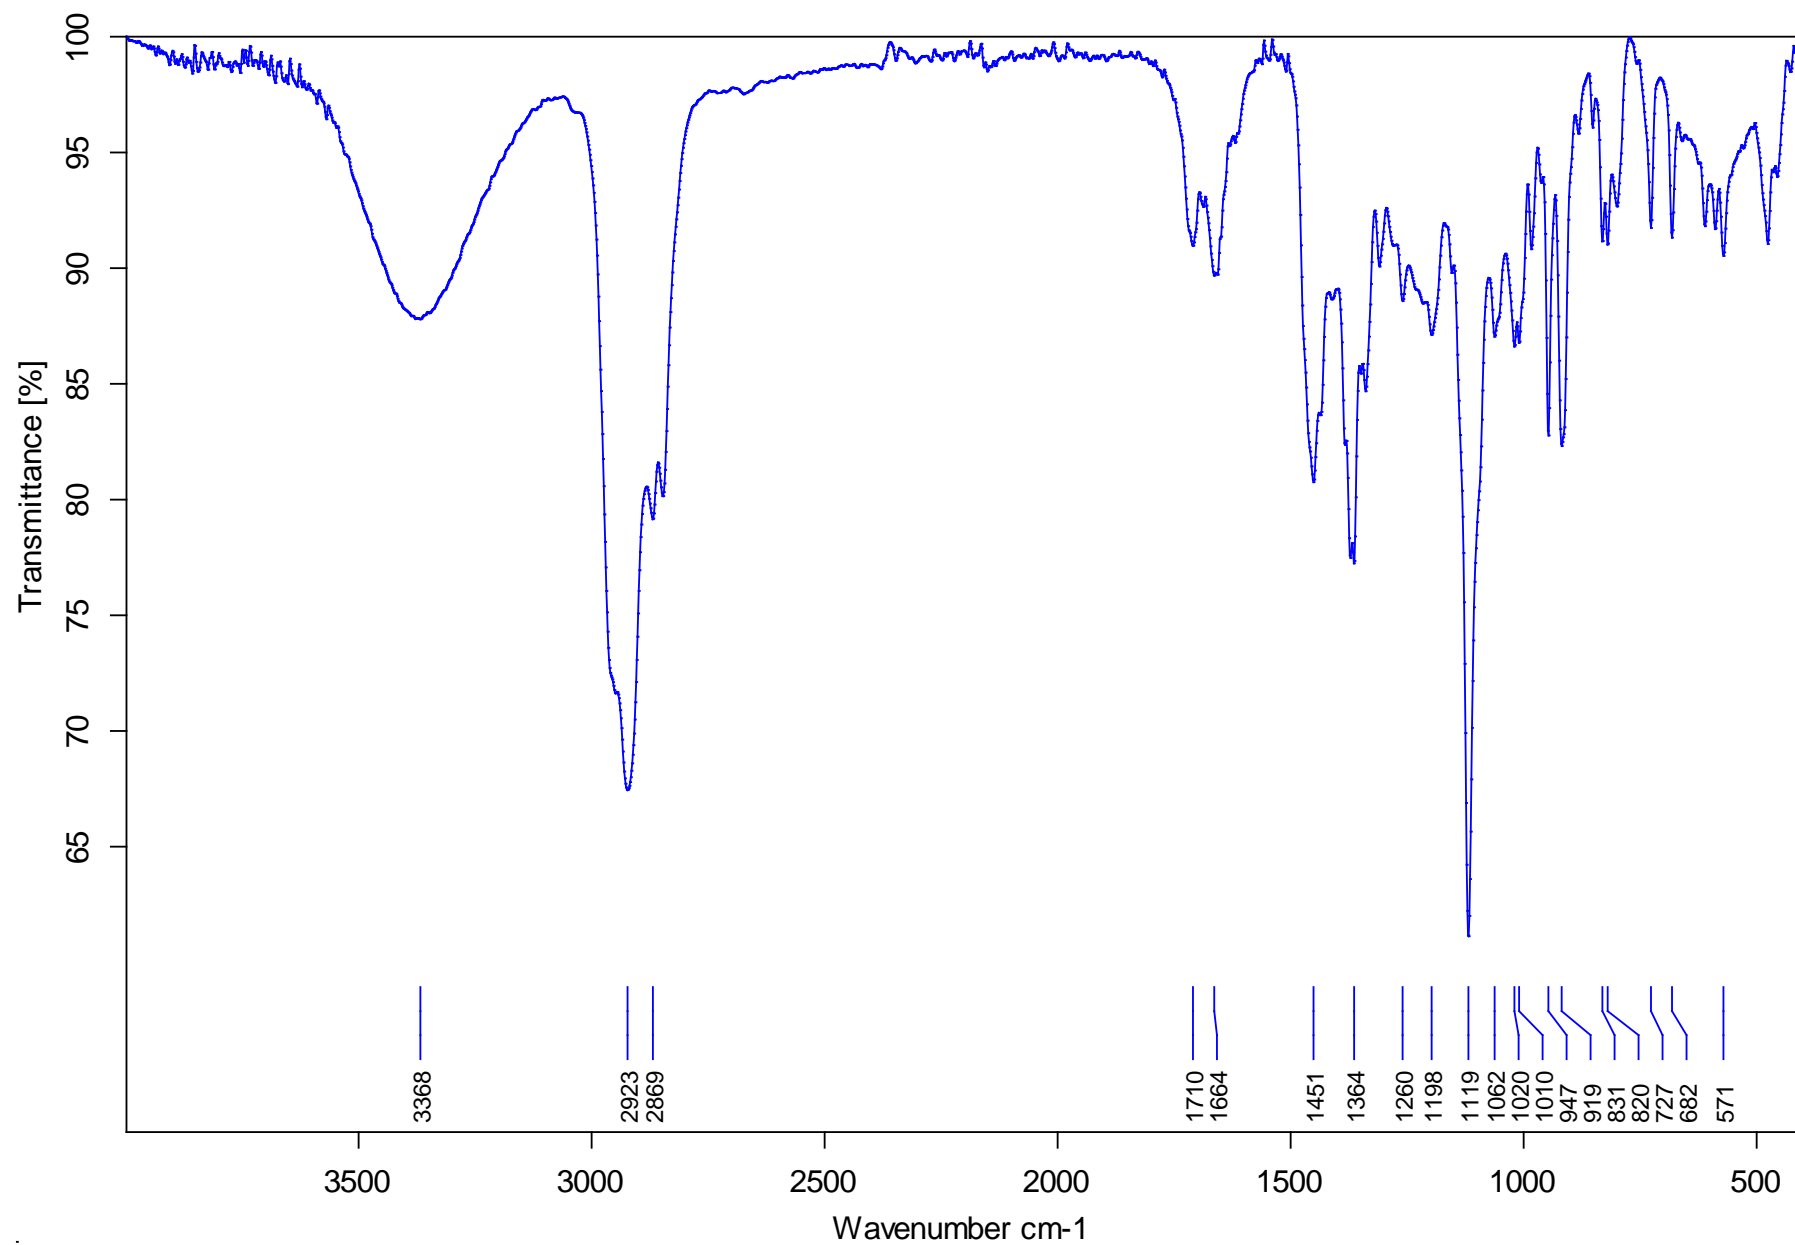

Figure S37

**<sup>1</sup>H NMR of 25**

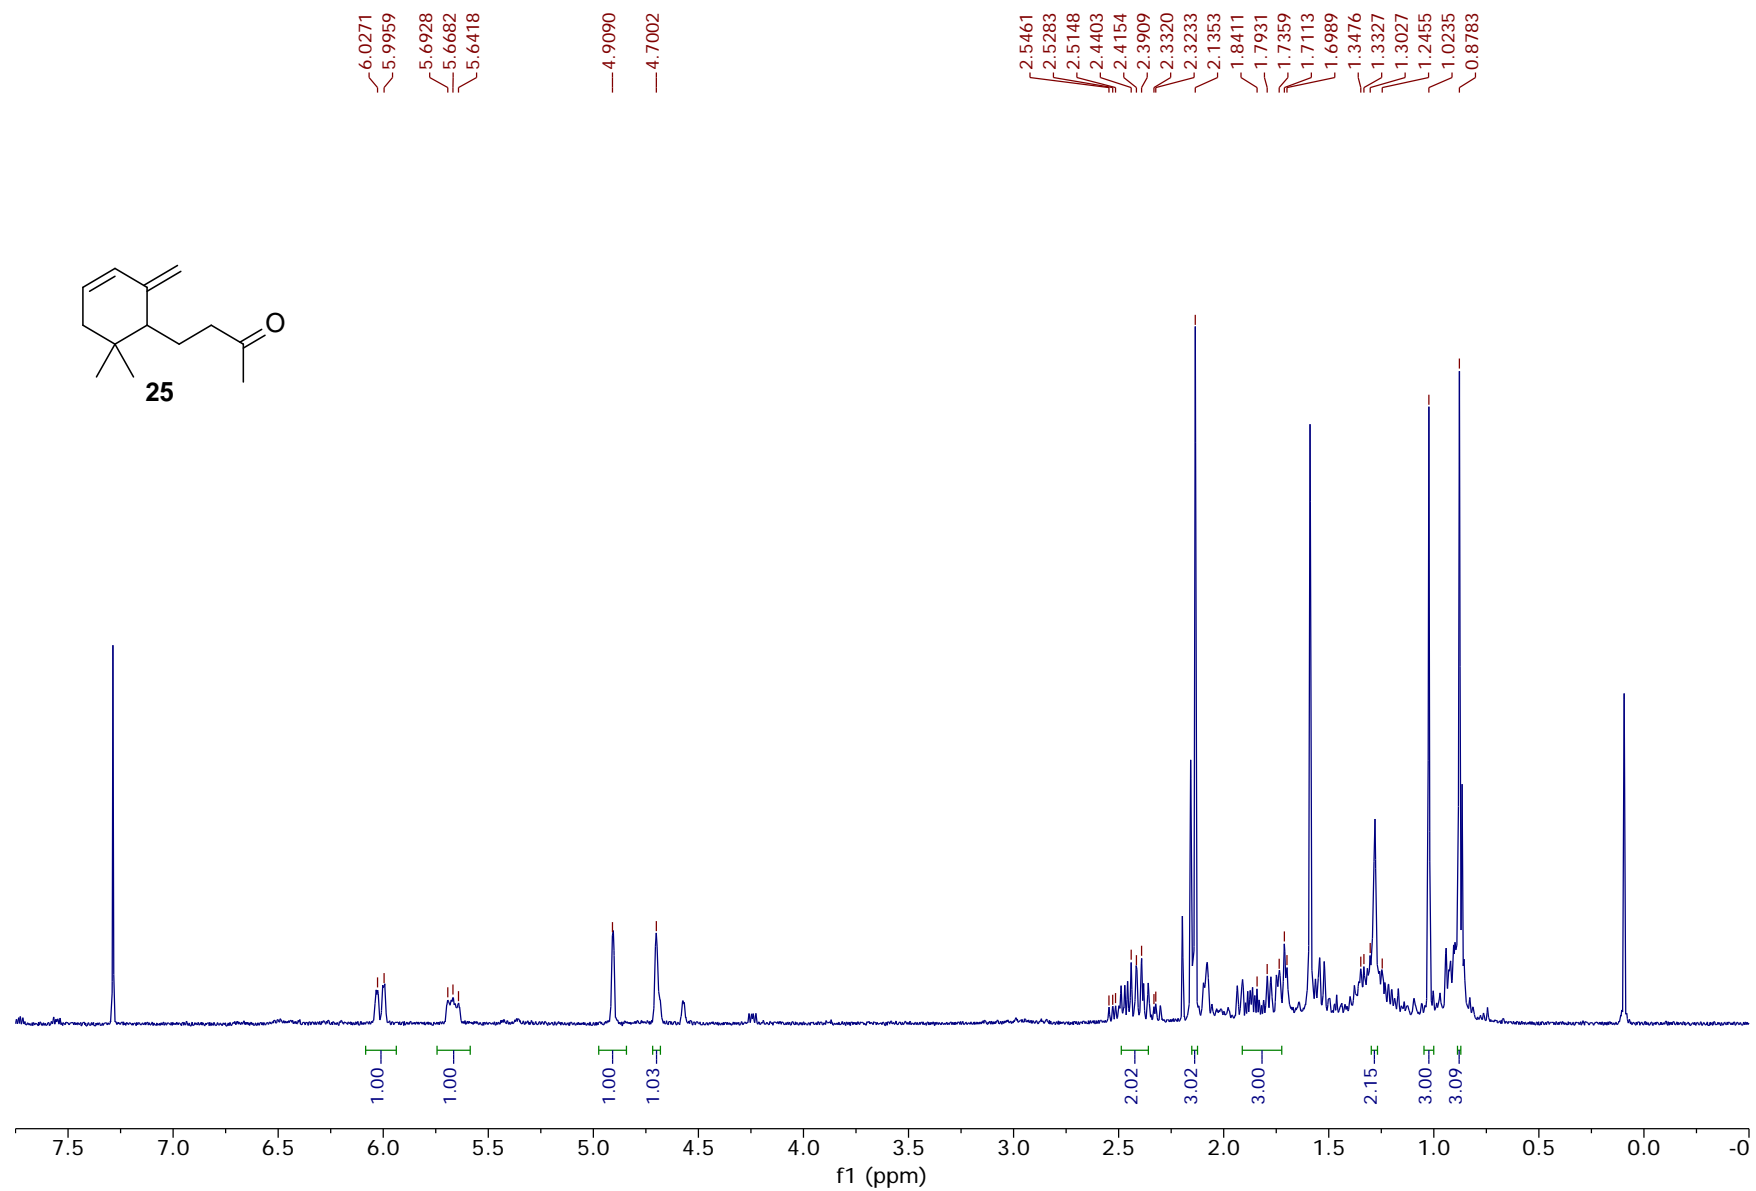

Figure S38

**$^1\text{H}$  NMR, DEPT 135,  $^{13}\text{C}$  NMR and IR of 22**

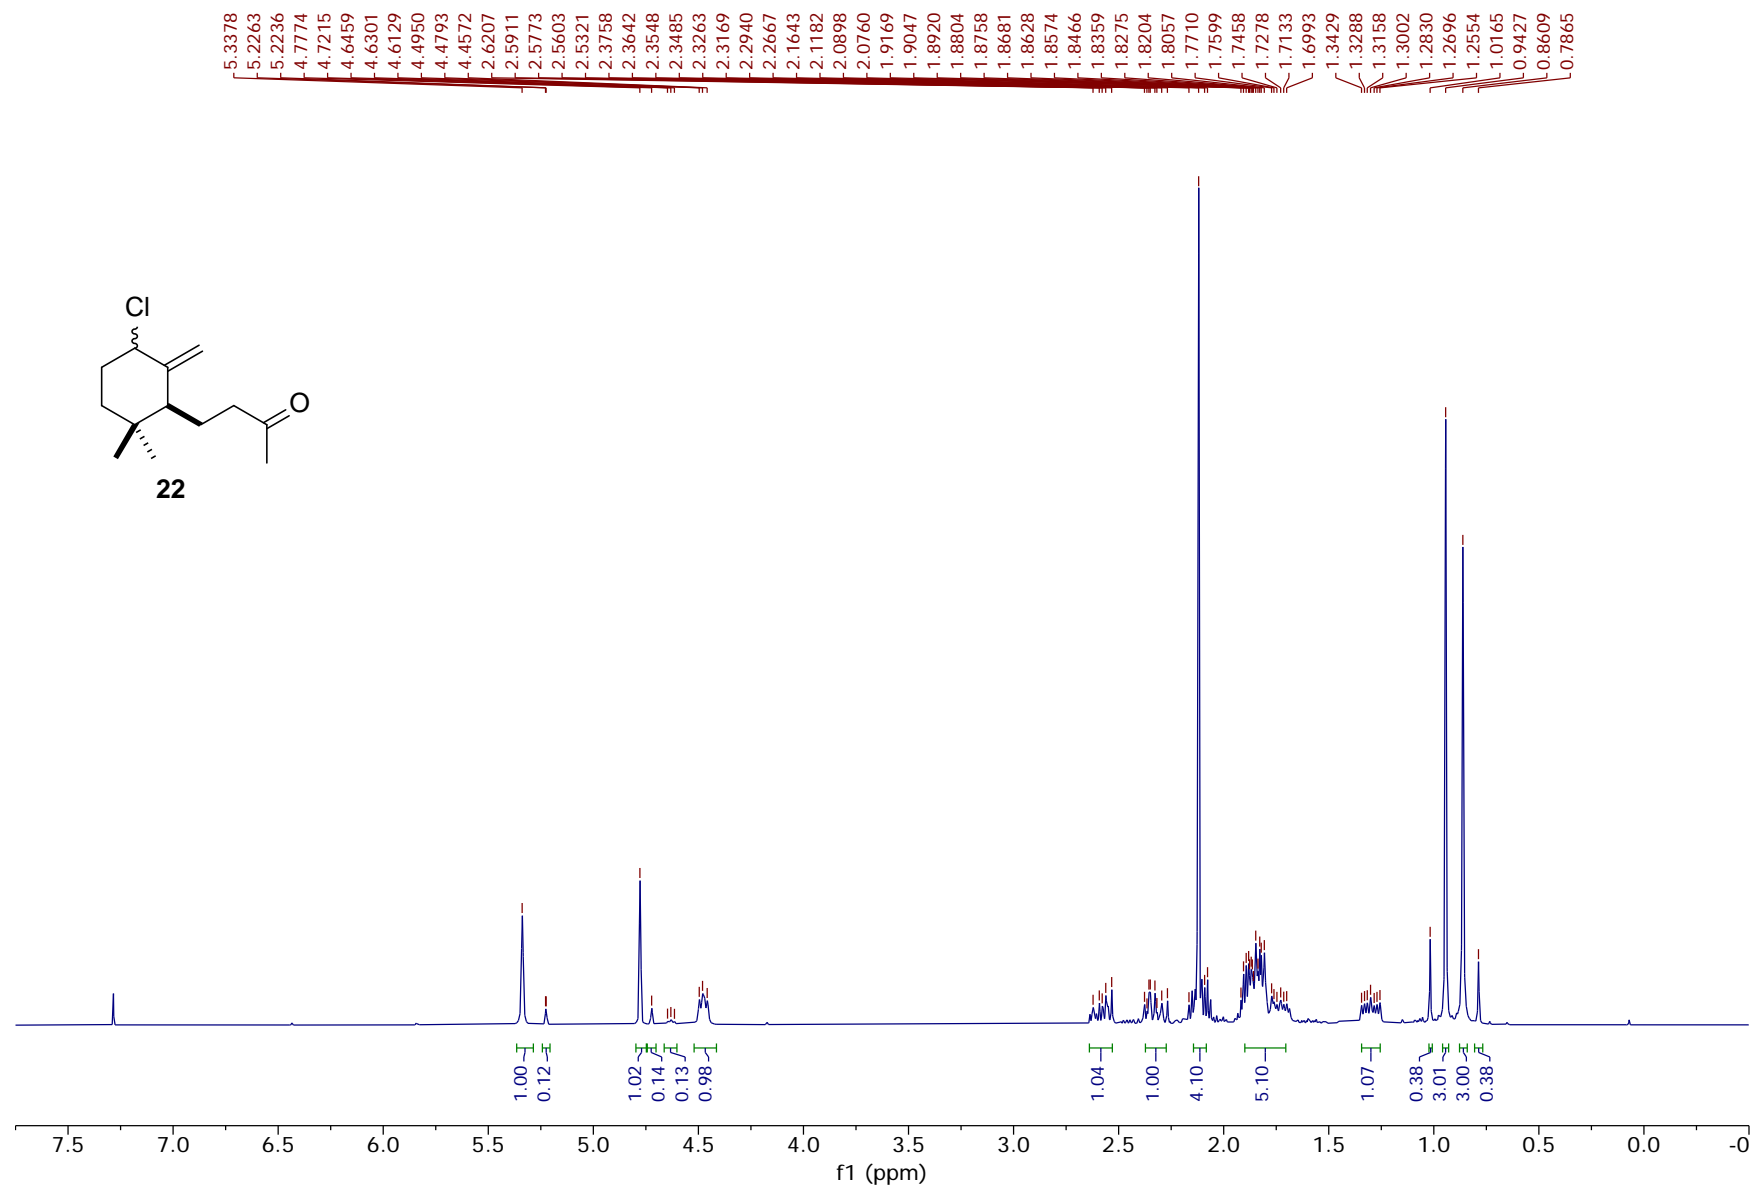

Figure S39



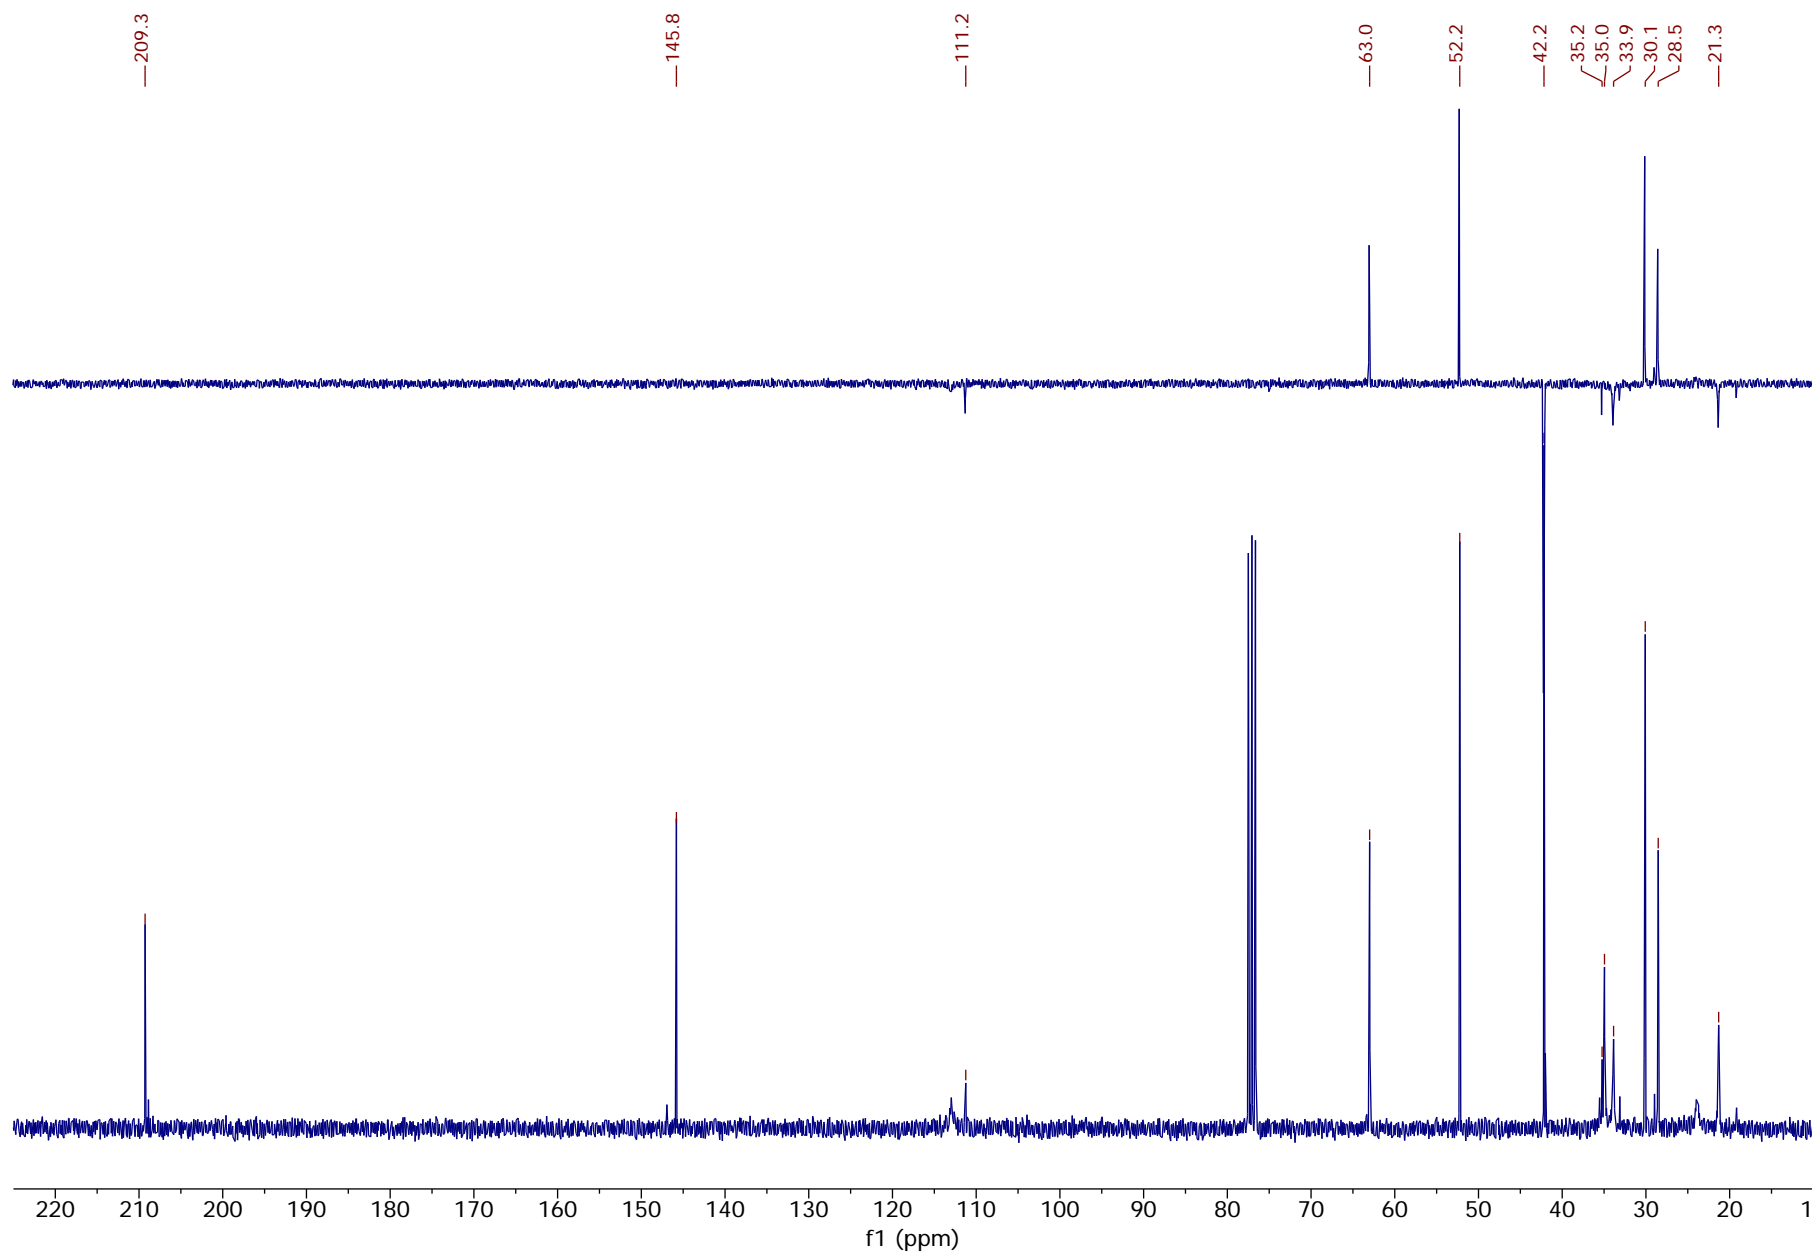

Figure S40

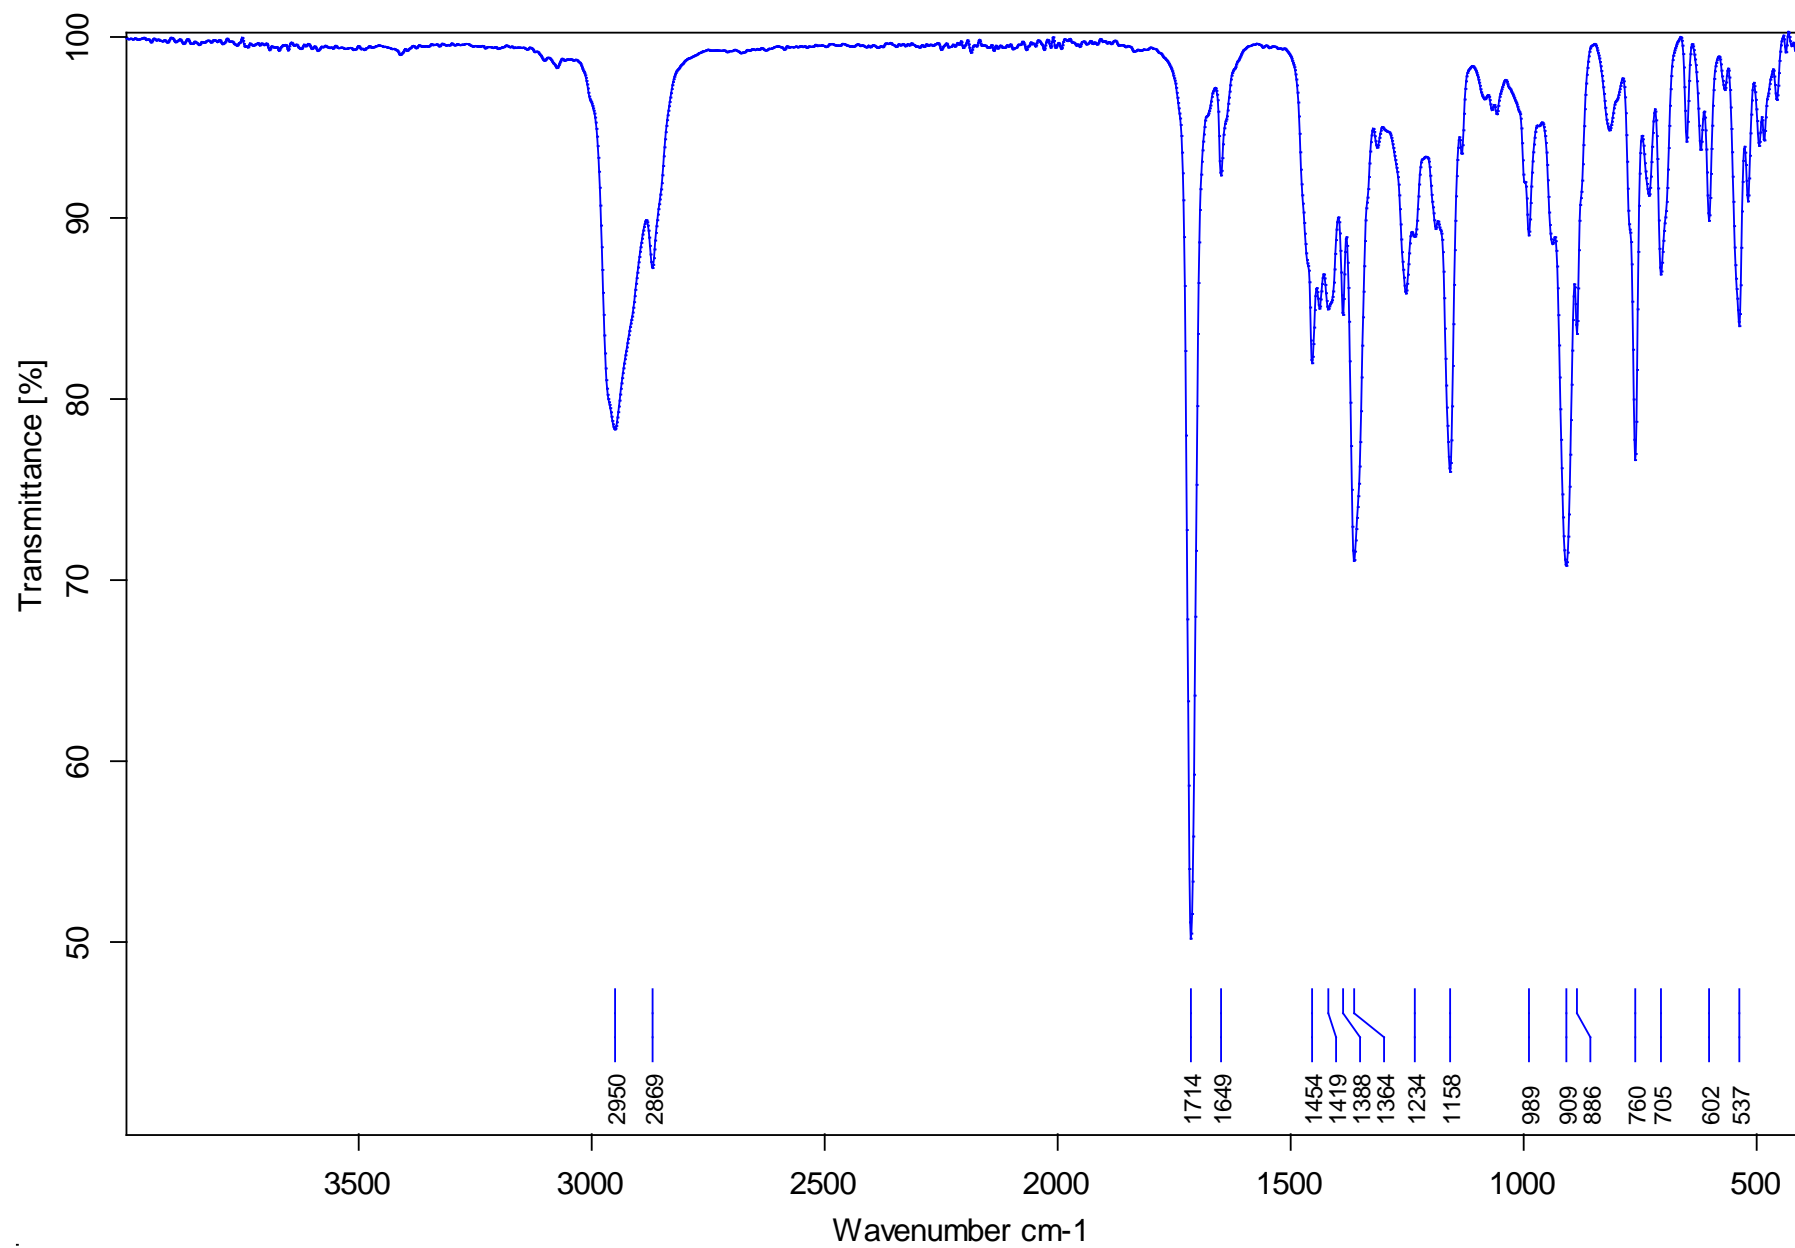

Figure S41

**$^1\text{H}$  NMR, DEPT 135,  $^{13}\text{C}$  NMR, HSQC, HMBC, COSY and IR of 26**

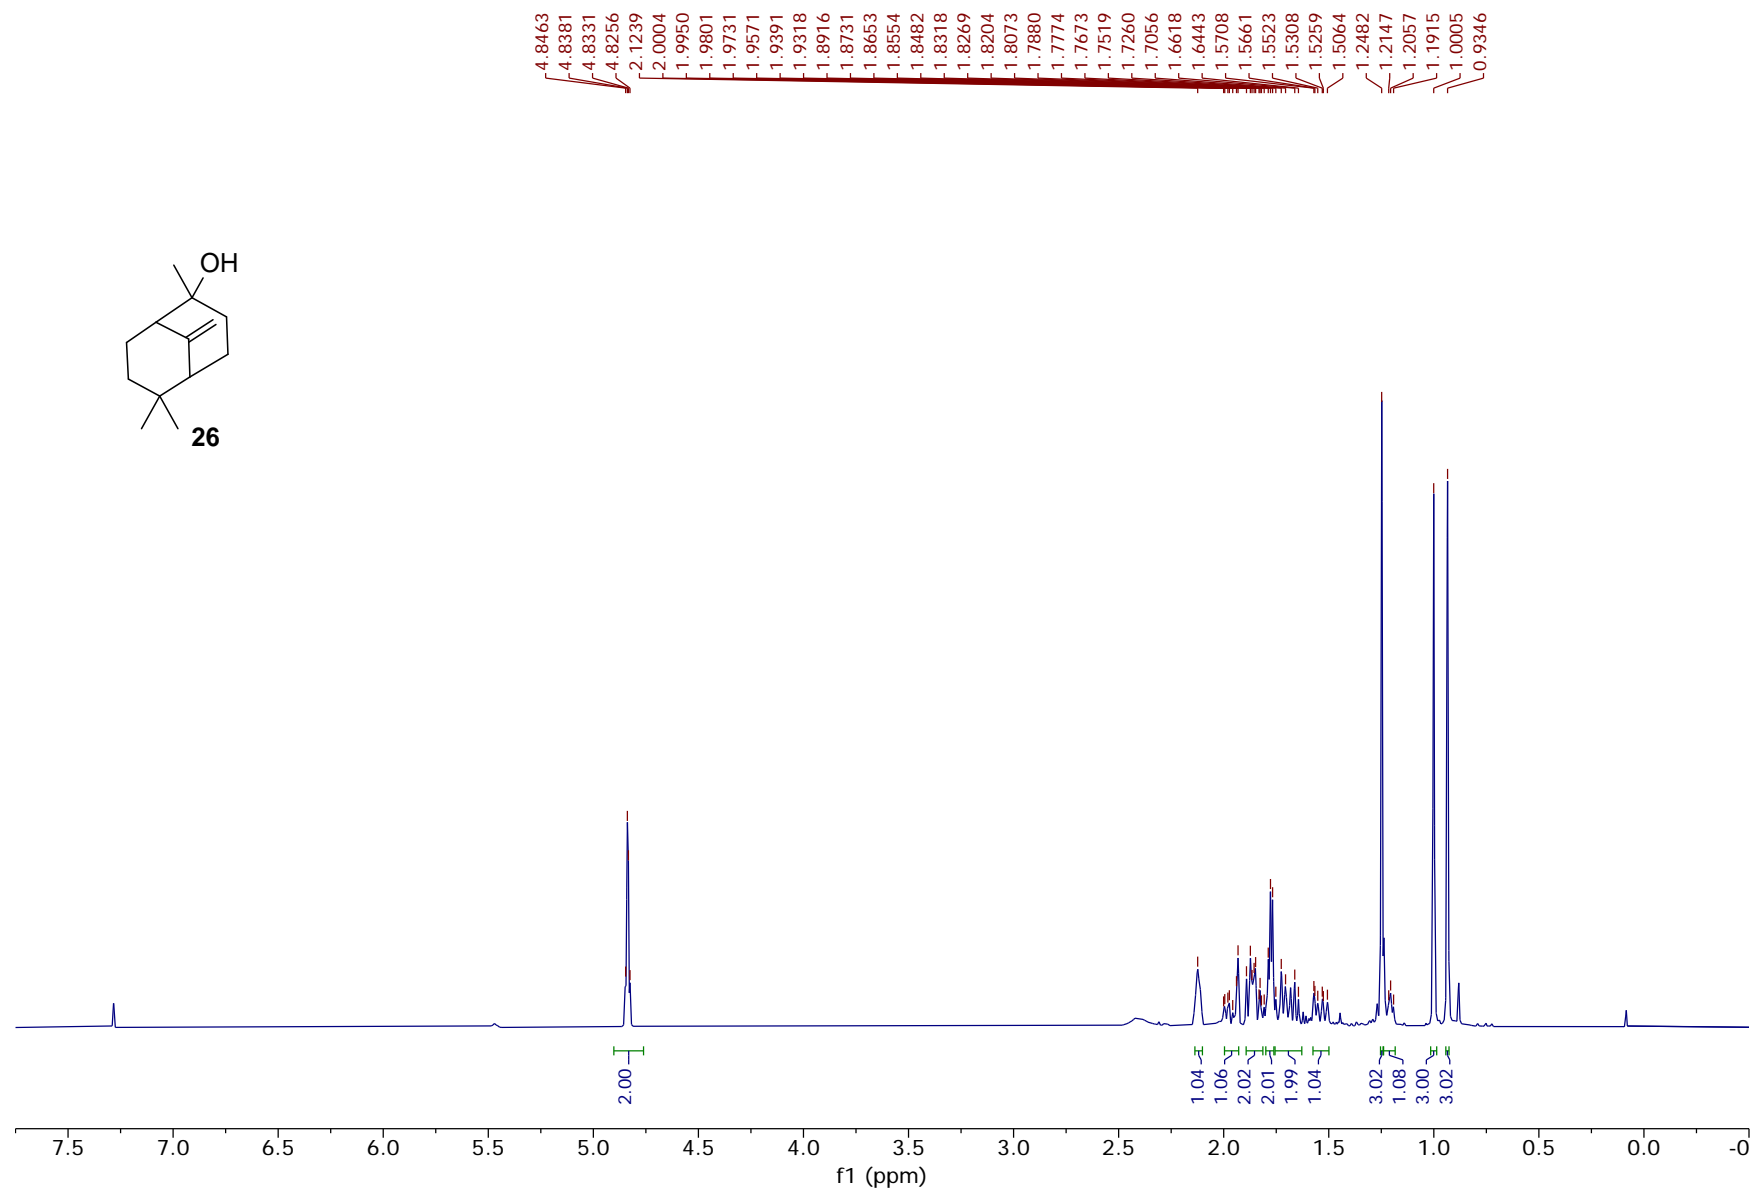

Figure S42

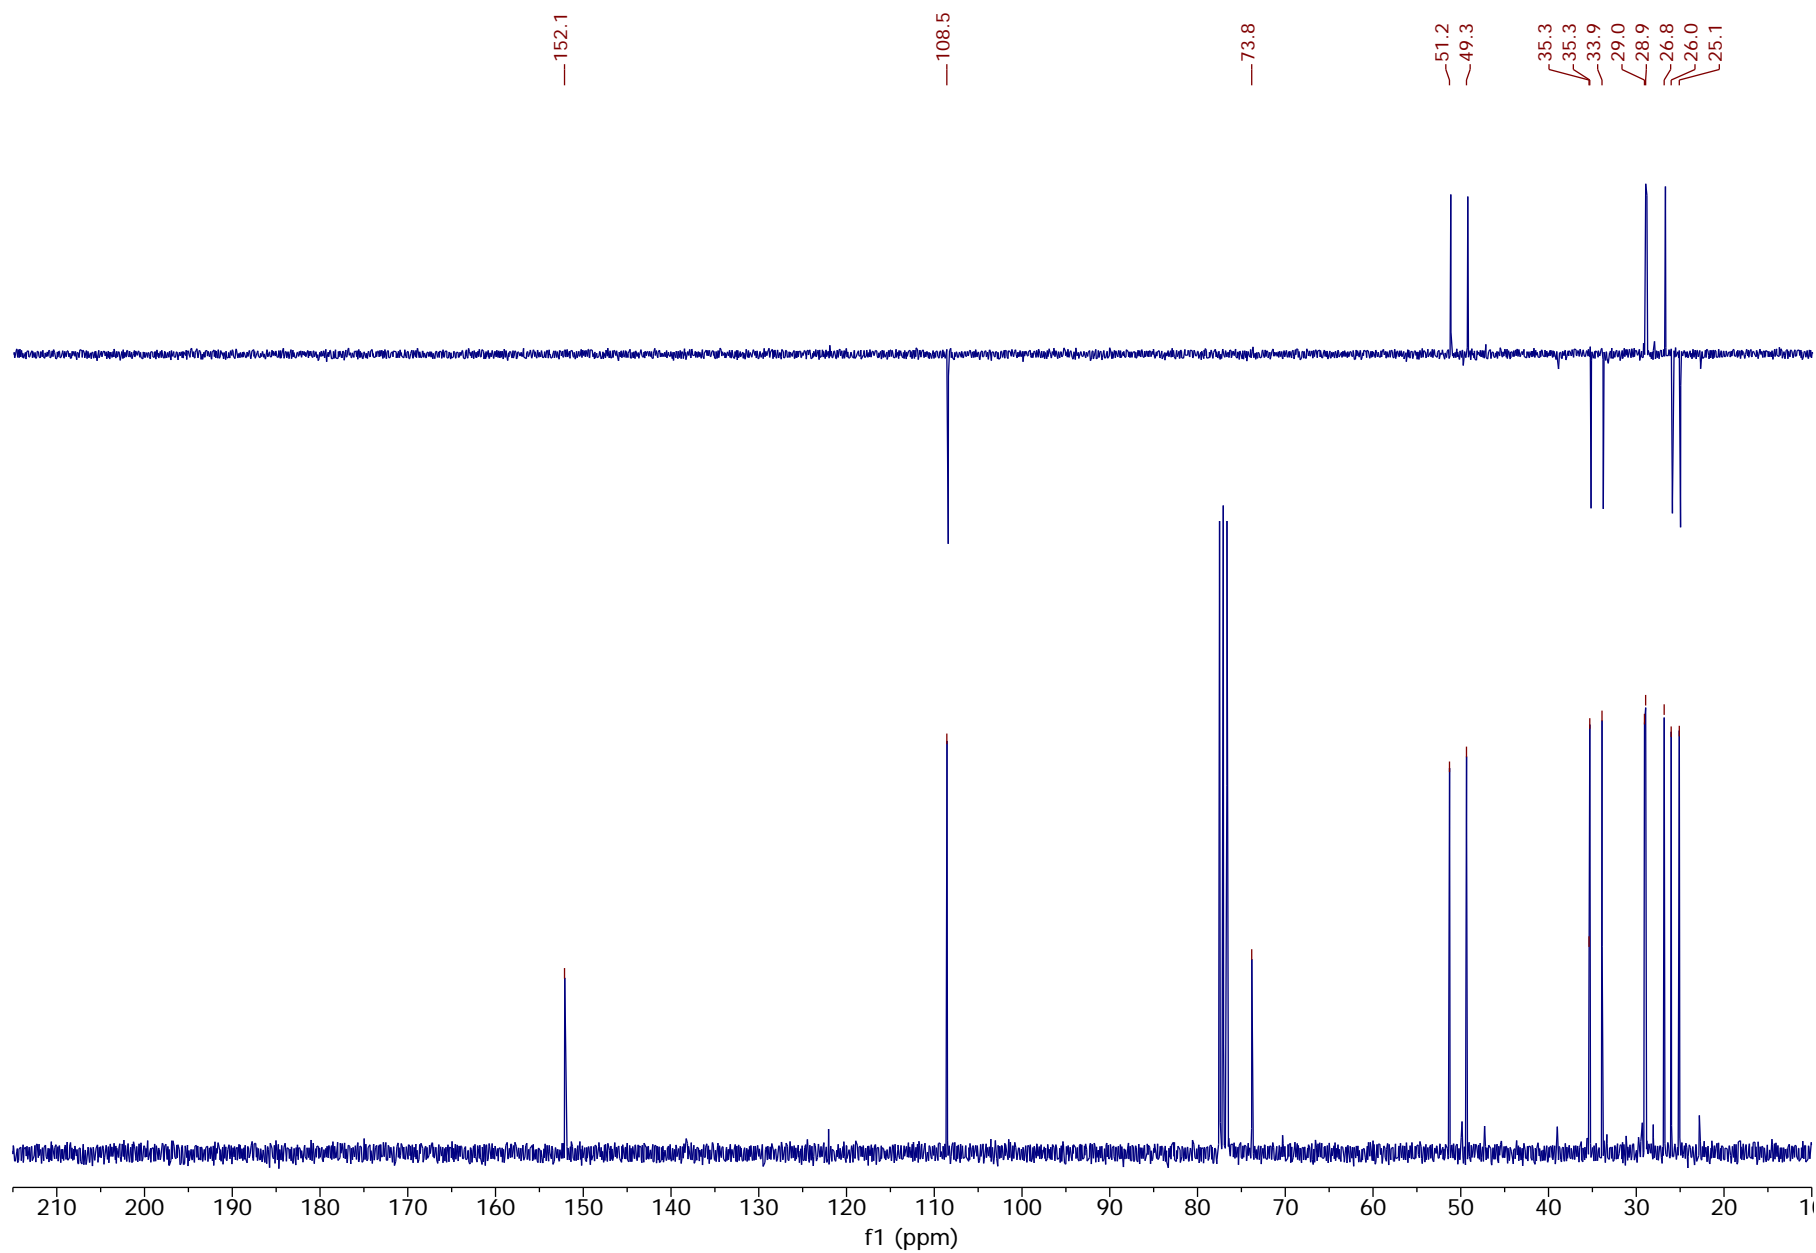

Figure S43

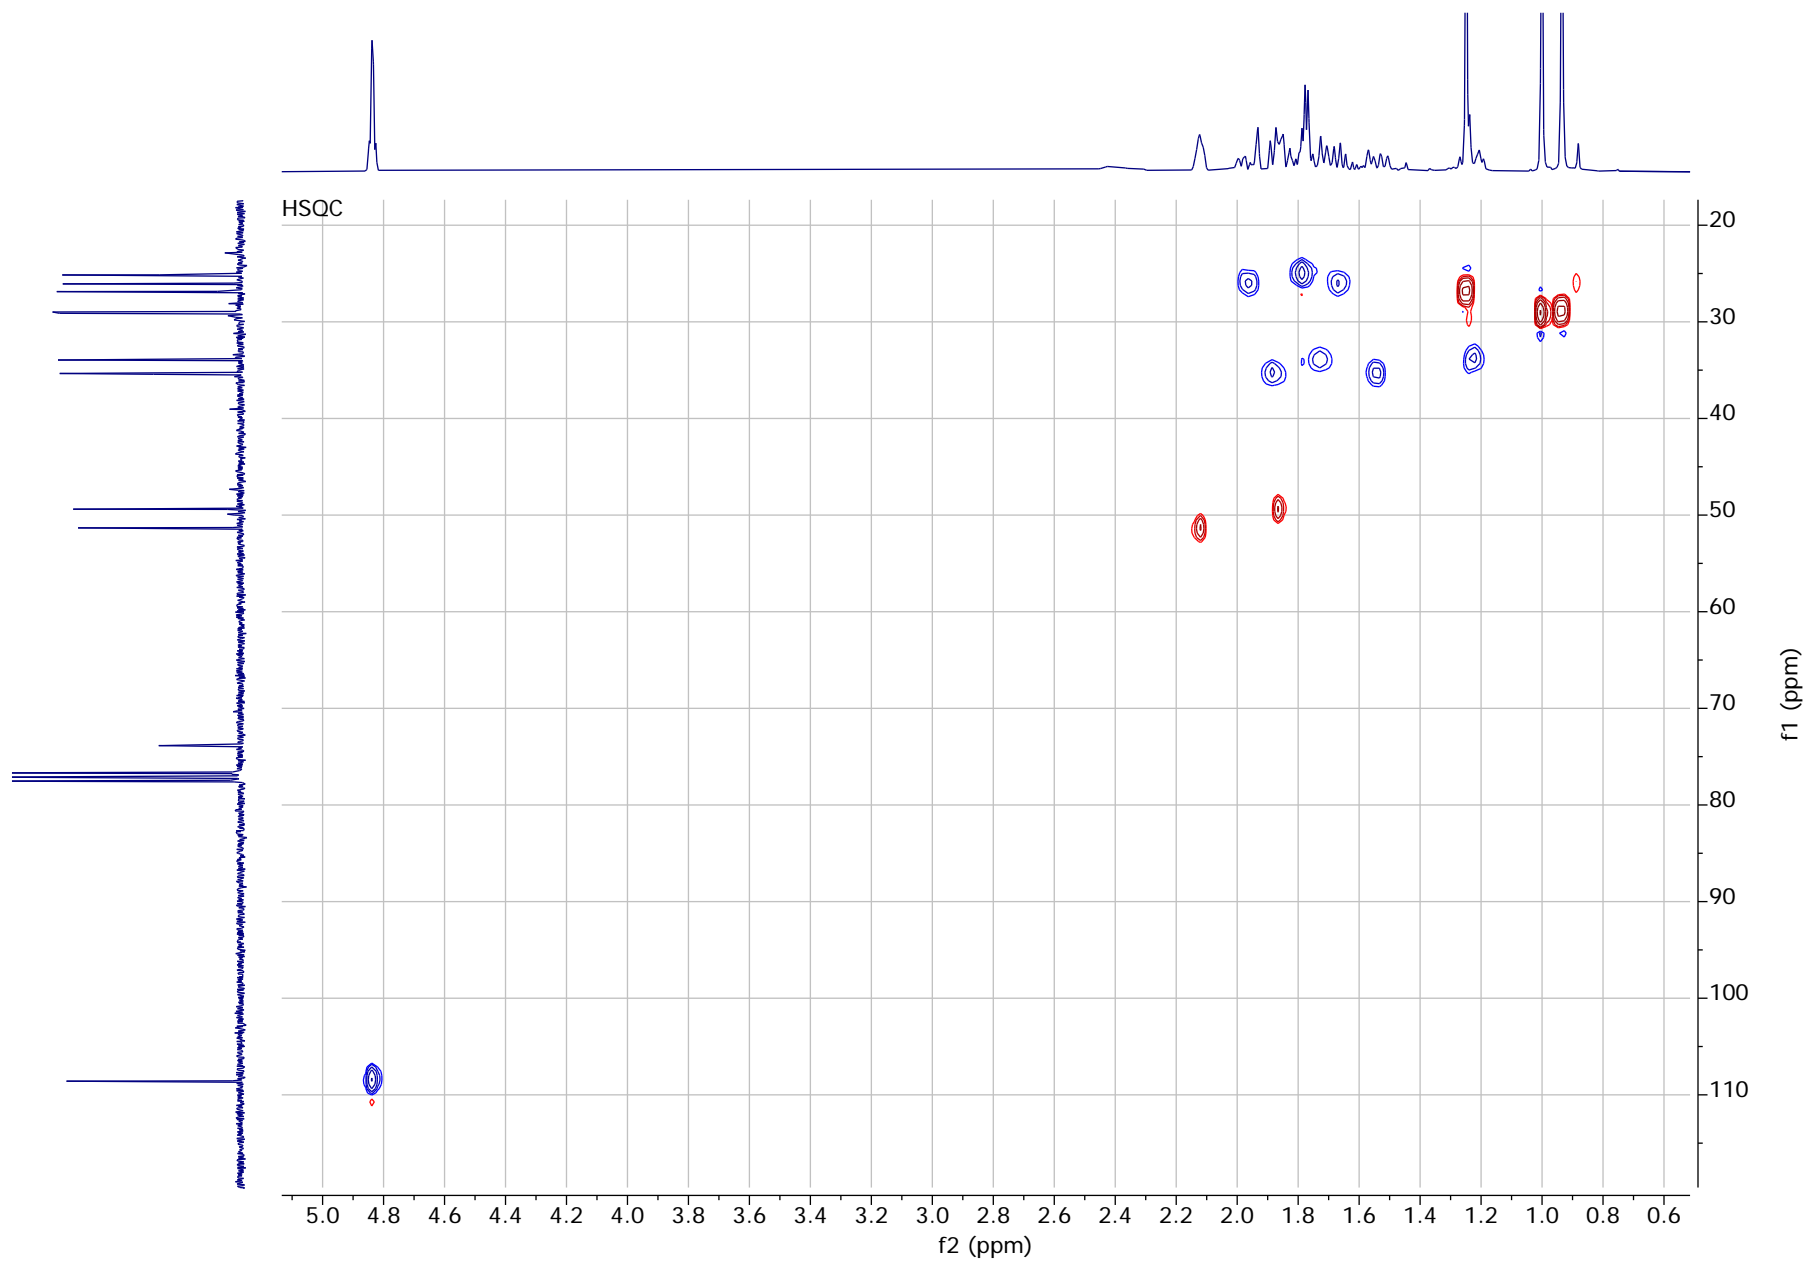

Figure S44

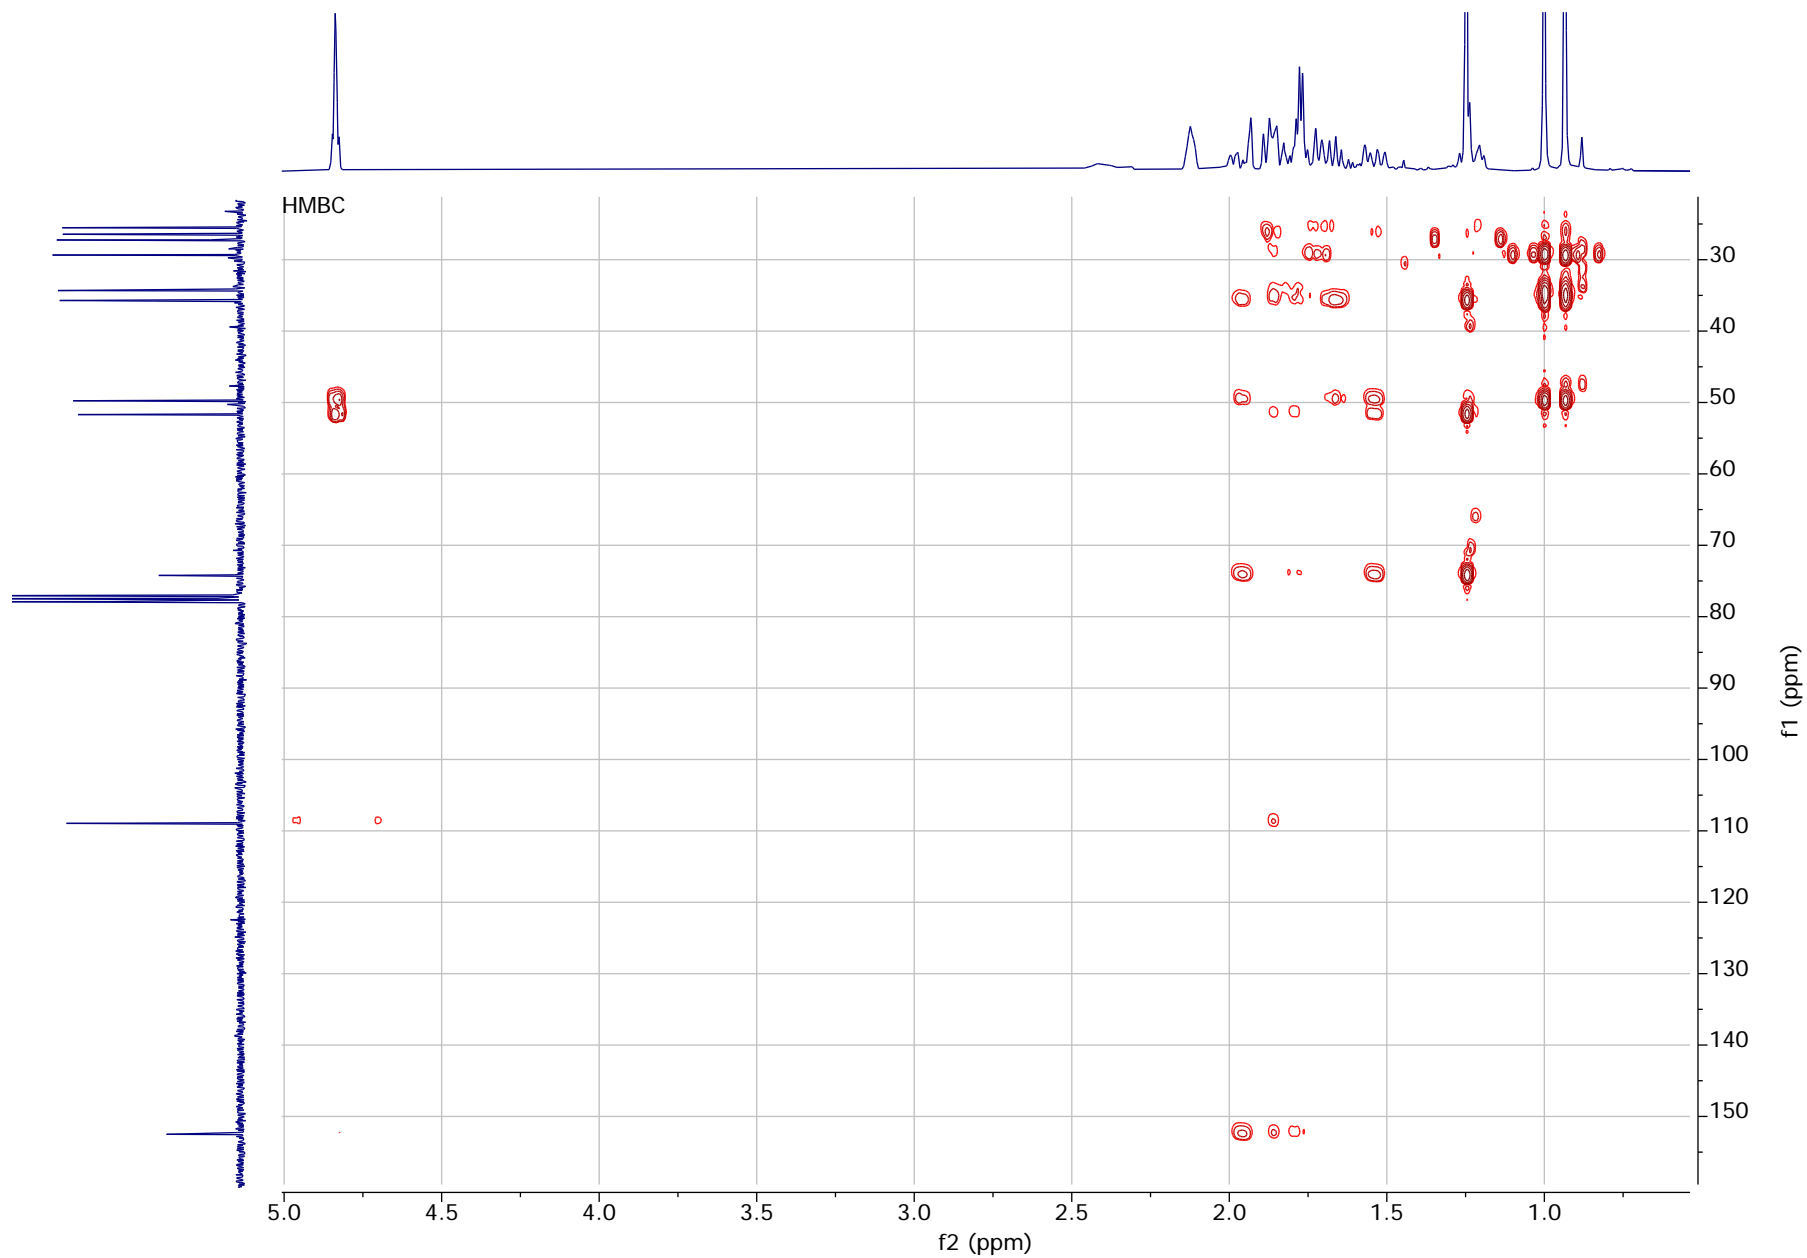

Figure S45

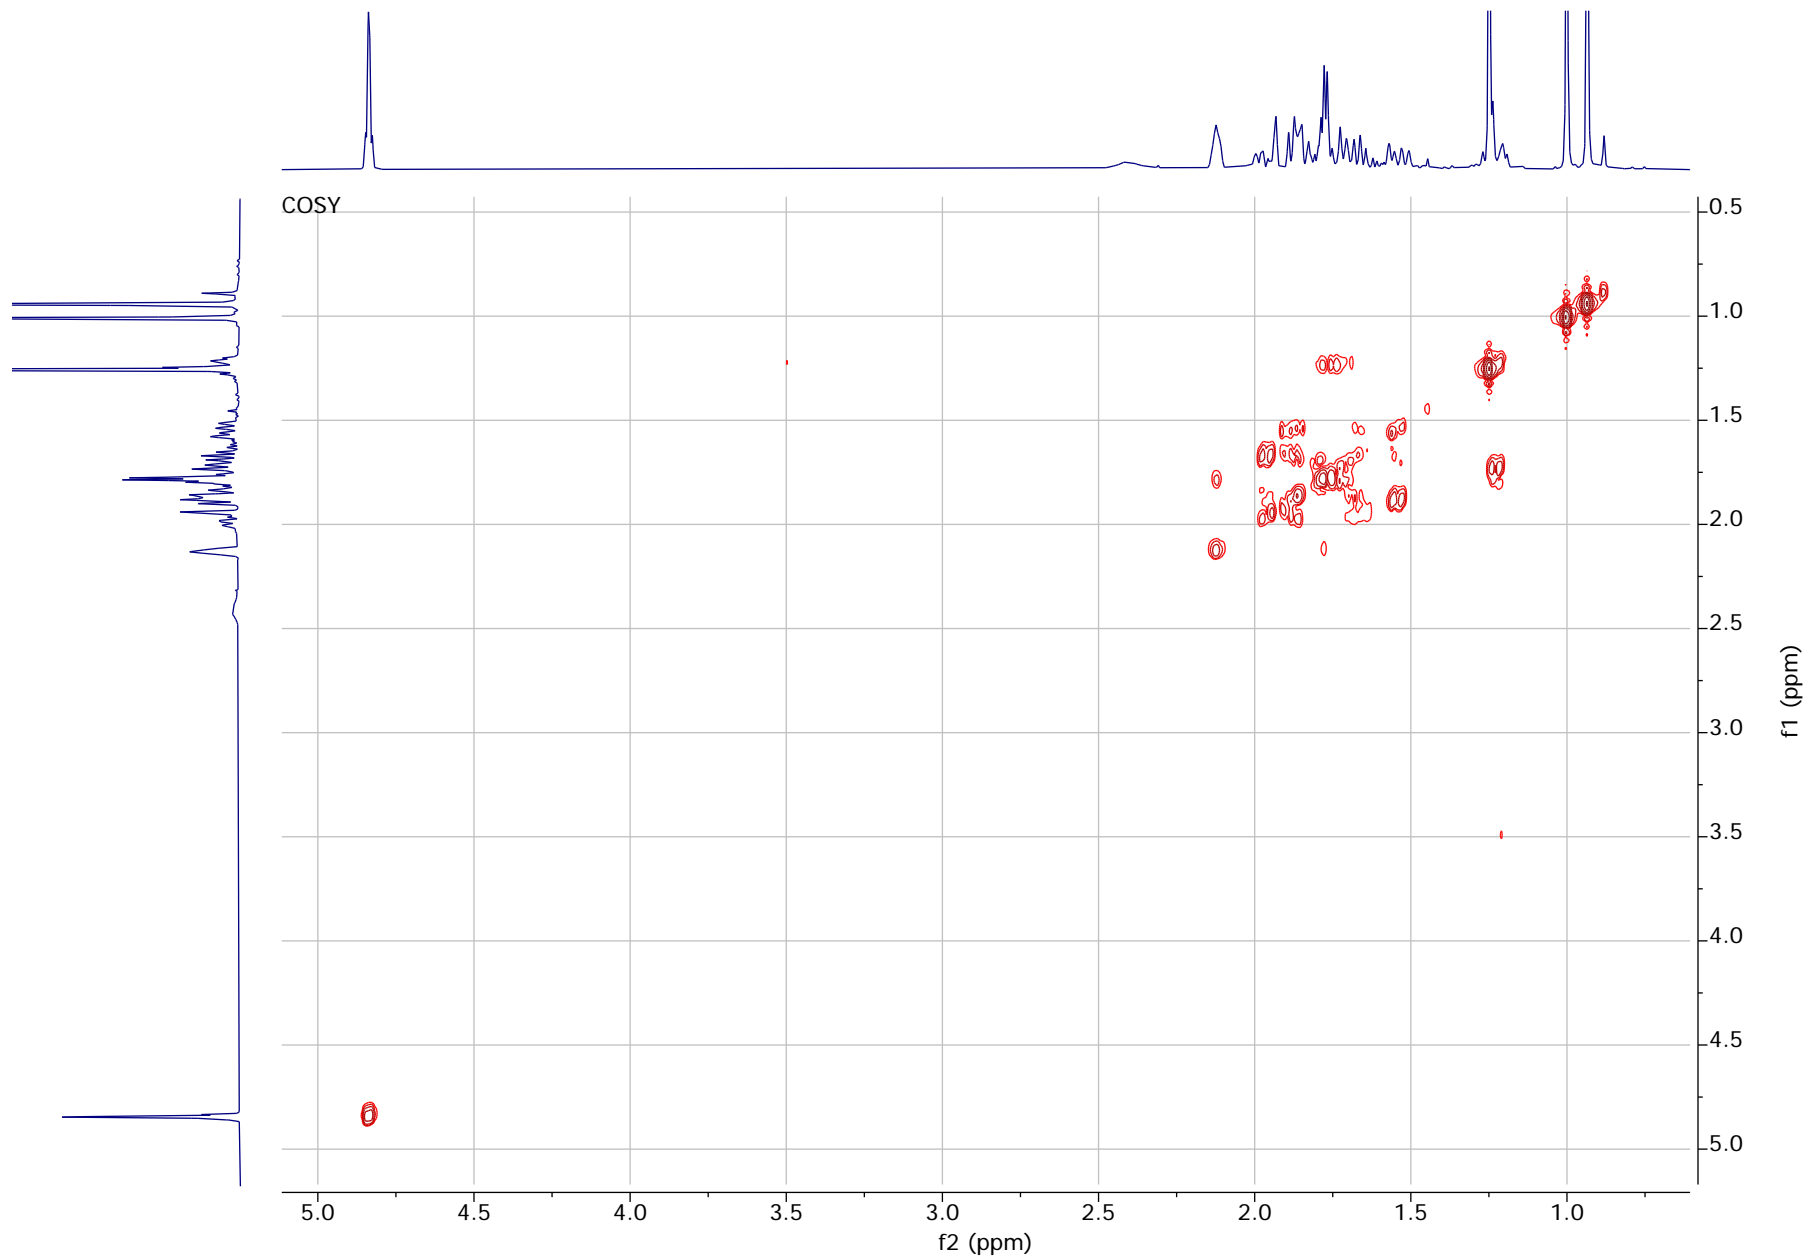

Figure S46

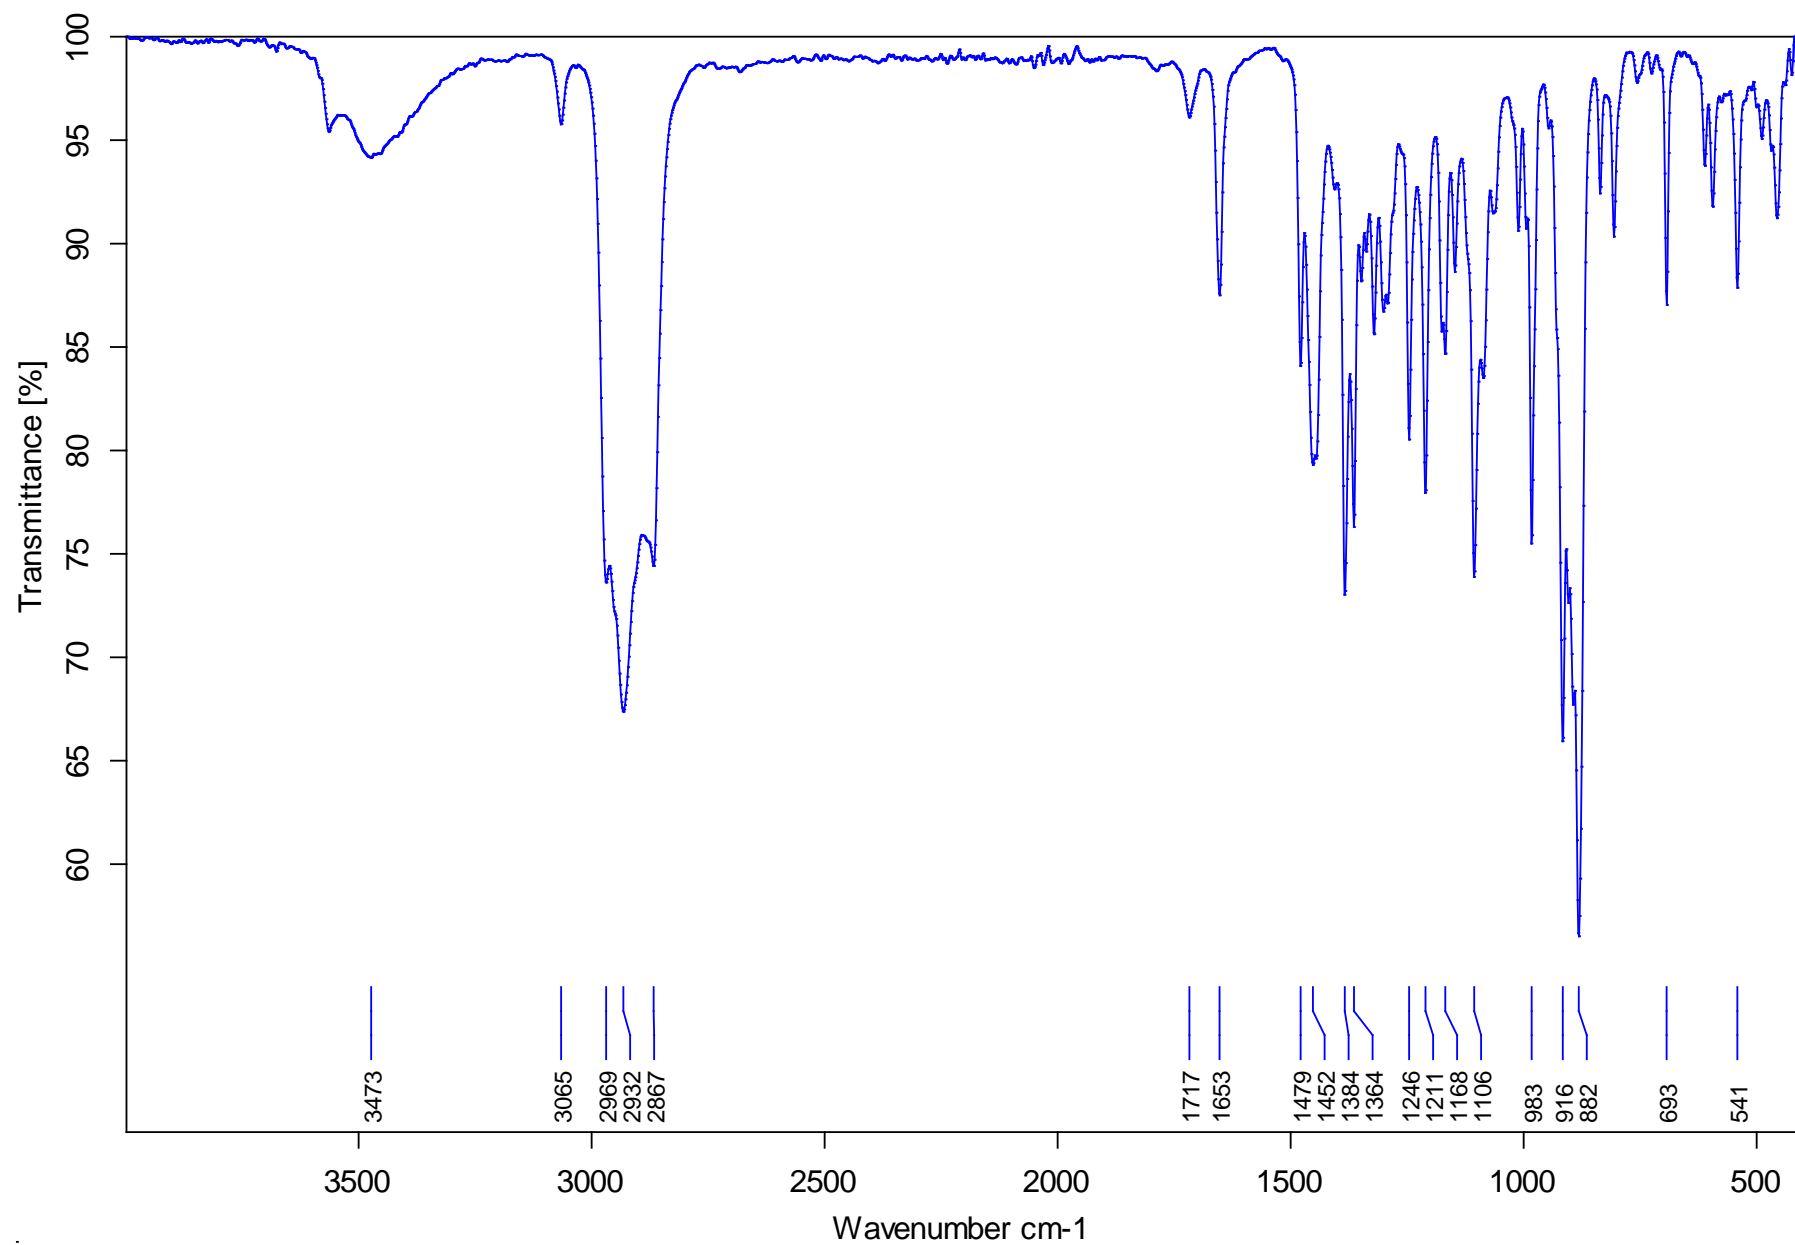

Figure S47
